# Supplementary material for: Efficient data extraction from neutron time-of-flight spin-echo raw data
Source: J Appl Crystallogr. 2019 Aug 29;52(Pt 5):1022–34. doi: 10.1107/S1600576719010847 (PMC6782076; doi:10.1107/S1600576719010847)
Supplement: Supplementary file 1 [file j-52-01022-sup1.pdf]

# report20670\_707.tex

Jülich Center of Neutron Science, Jülich, Garching, Oak Ridge

DrSpine NSE-data-harvesting Version: 0.42-f1a9f38 (build on Mar 13 2019 10:48:26, GNU Fortran)  
Report problems to p.zolnierczuk@fz-juelich.de and/or m.monkenbusch@fz-juelich.de

SDS5wD2O\_”SDS\_with\_NaCl\_in\_D2O\_0.05w\_in\_refpos,\_room\_temp”

## Macro call:

*Content of the macro as executed here can be found at the end of this report!*

Table 1: Overview of loaded data files

| num   | np | name            | $2\theta$    | $\lambda_{1,n}/\text{\AA}$ | $J_{\text{eff}}/\text{milliTm}$ | T/K    | up    | down  | role | mode     |
|-------|----|-----------------|--------------|----------------------------|---------------------------------|--------|-------|-------|------|----------|
| 20666 | 20 | actC2mm Sat Jun | $3.67^\circ$ | 8.00 -8.00                 | 0.9925 - 939.57                 | 0.0000 | 99.62 | 14.29 | ref  | standard |
| 20668 | 20 | actC2mm Sat Jun | $5.14^\circ$ | 8.00 -8.00                 | 0.9928 - 939.57                 | 0.0000 | 34.79 | 4.771 | ref  | standard |
| 20669 | 20 | actC2mm Sun Jun | $7.29^\circ$ | 8.00 -8.00                 | 0.9932 - 939.55                 | 0.0000 | 13.11 | 1.871 | ref  | standard |
| 20676 | 18 | actC4mm Sun Jun | $11.0^\circ$ | 8.00 -8.00                 | 0.9940 - 730.77                 | 0.0000 | 25.29 | 2.843 | ref  | standard |
| 20670 | 16 | SDS5wD2O Sun Ju | $3.69^\circ$ | 8.00 -8.00                 | 0.9925 - 730.77                 | 0.0000 | 51.53 | 5.682 | sam  | standard |
| 20672 | 4  | SDS5wD2O Sun Ju | $5.13^\circ$ | 8.00 -8.00                 | 0.9928 - 10.388                 | 0.0000 | 85.66 | 9.053 | sam  | standard |
| 20673 | 16 | SDS5wD2O Sun Ju | $5.13^\circ$ | 8.00 -8.00                 | 0.9928 - 730.77                 | 0.0000 | 84.54 | 8.979 | sam  | standard |
| 20674 | 16 | SDS5wD2O Sun Ju | $7.31^\circ$ | 8.00 -8.00                 | 0.9932 - 730.76                 | 0.0000 | 70.83 | 8.155 | sam  | standard |
| 20675 | 13 | SDS5wD2O Sun Ju | $11.0^\circ$ | 8.00 -8.00                 | 0.9940 - 417.56                 | 0.0000 | 19.36 | 2.773 | sam  | standard |

## Remarks:

Up and down intensity are given in terms of TOF summed, monitor(?) normalized counts in the central binned pixel, intensity units scaled by  $1.000 \times 10^3$

## Binning:

Detector area to  $8 \times 8$  pixels ,  $\lambda$ -bins from 1 TOF channles to 1  $\lambda$ -bins

Table 2: Active Reduction Parameters:

| Parameter                  | symbol                          | udf-name        | value                   | remark                                             |
|----------------------------|---------------------------------|-----------------|-------------------------|----------------------------------------------------|
| minimum counts             | $c_{\min}$                      | r.min_counts    | 100.00                  | use only pixels with $c > c_{\min}$                |
| minimum sigma              | $\sigma_{\min}$                 | r.min_sigma     | 0.0500                  | use only pixels with variation larger than sigma   |
| min. average               | $B_{\min}$                      | r.ave_min       | 0.0000                  | min. echo average value                            |
| max. average dev.          | $\Delta B = \frac{2B}{U+D} - 1$ | r.ave_maxdev    | 0.2500                  | max. echo average deviation from U/D average       |
| min resolution (fqt)       | Fqt min                         | r.fqt_min       | 0.2000                  | minimum pixel fqt value (res)                      |
| max resolution (fqt) error | max $\sigma(Fqt)$               | r.fqt_maxsigma  | 0.8000                  | maximum error for pixel fqt value (res)            |
| phase tolerance            | $\epsilon$                      | r.phase_tol     | $1.0000 \times 10^{-9}$ | echo phase fitting tolerance                       |
| phase limits               | $\Delta\phi_{\max}$             | r.phase_maxdev  | 1.2700                  | echo phase fitting limits [rad]                    |
| phase shift limits         | $\delta\phi_{\min}$             | r.phase_minoff  | $1.0000 \times 10^{-4}$ | symmetry phase offset minimum                      |
| phase smoothing step       | $\Delta\phi_{\text{smooth}}$    | r.phase_cstep   | 1.5700                  | symmetry phase correction step for smoothing [rad] |
| max chi**2                 | $\chi_{\max}^2$                 | r.max_chisq     | $1.0000 \times 10^3$    | max. chisquare for echo group fit                  |
| intensity factor           | $f$                             | -               | $1.0000 \times 10^3$    | all up, down, average values are scaled by it.     |
| Postcollection q-group     | $\Delta q$                      | r.postcoll_qcat | $2.5000 \times 10^7$    | Width for postcollection q-grouping                |

## Explanations:

- **num** = run number of \*.echo file
- **np** = number of field integral settings.
- $2\theta$  = nominal scattering angle (detector center).
- $\lambda_{1,n}$  = minimal and maximal wavelength in the selected frame.
- $J_{\text{eff}}$  = min, max effective field intergral settings.
- $T/\text{K}$  = sample temperature (reading of sample T-sensor).
- **up** = spin-up intensity at central detector pixel.

- **down** = spin-down intensity at central detector pixel.
- **role** = assigned role as reference, sample or background..
- **mode** = normal=std NSE mode, or shorty for very small field integrals.
- $\Delta q$  = q-banding width for q-groups in the dtr output files.

..for the tables shown below:

- **#** = number of  $\tau$  ( $J_0$ ) setting of that scan
- **J<sub>0</sub> /mTm** = effective field integral in milli Tesla meter
- **theta** =  $2\theta$  the nominal scattering angle (detector center).
- **nt** = number of  $\lambda$ -bins to cover the TOF-frame
- **npic** = total number of detector pixels
- **nact** = total number of usable (survived) detector pixels
- **average0** = average intensity at central pixel
- **<average>** = average intensity over active detector area (per pixel)
- **<amplitu>** = average echo amplitude over active detector area (per pixel)
- **dj0/muTm** = symmetry deviation  $\Delta J$  of central pixel in  $\mu Tm$
- **dja/muTm** = symmetry deviation  $\Delta J$  of average pixel in  $\mu Tm$
- **djv/muTm** = variance of symmetry deviation  $\Delta J$  over active detector in  $\mu Tm$
- **lam1** =  $\lambda_{\min}/\text{\AA}$  of wavelength bin
- **lam2** =  $\lambda_{\max}/\text{\AA}$  of wavelength bin
- **ref** = run number of matched reference (0=N.A.)
- **pt** = matching scan point of reference
- **bgr** = run number of matched background (0=N.A.)
- **pt** = matching scan point of background

#### PIXEL STATUS short letter- and (color- codes) in portrait plots:

- **R** : no resolution ( 1000)
- **B** : no background ( 2000)
- **O** : offset failed ( 4000)
- **F** : fit failed ( 10)
- **Q** : fit - chi2 too large ( 20)
- **I** : fit - amplitude too small ( 40)
- **N** : fit - negative amplitude ( 100)
- **C** : not enough counts ( 1)
- **a** : raw amplitude ( 2)(If abundand: reduce *minimum sigma*  $\sigma_{\min}$  ; **r.min.sigma** )
- **A** : average is out of bounds ( 4)
- **U** : average is not consistent with up/down ( 8)

# Detailed list of loaded run files<sub>(report details)</sub>

20666

m20666.echo

actC2mm Sat Jun 23 18:37:55 2018

actC2mm "actC 2mm at 18:37:55 2018"

reference 20 pnts

actC2mm "actC 2mm at sampos in spongebob"

actC2mm "actC 2mm at sampos in spongebob"

matching reference: 20666

matching background: -

wavelength  $\lambda = 8.0000 \text{ \AA}$

$Q/\text{\AA}^{-1} = 0.0503$  ( $2\theta = 3.6694^\circ$   $\Psi = -88.177^\circ$ )

Up = 99.617 Down = 14.289

Normalized echo amplitude ( $J_{min}, J_{max}$ )

( $\tau_{min} = 0.0947 \text{ ns} \cdots \tau_{max} = 89.647 \text{ ns}$ ) at detector center: 0.9929 0.6594

| #  | J0/muTm   | theta | nt | npic | nact | average0    | <average>   | <amplitu>   | dj0/muTm | dja/muTm | djv/muTm | lam1/Å | lam2/Å | ref pt   | bgr pt | distribution: dj-count per 1muTm |
|----|-----------|-------|----|------|------|-------------|-------------|-------------|----------|----------|----------|--------|--------|----------|--------|----------------------------------|
| 1  | 992.49    | 3.67  | 1  | 64   | 55   | 5.73689E+01 | 4.39137E+01 | 3.27160E+01 | -0.1060  | 0.4066   | 1.2311   | 8.000  | 8.000  | 20666 1  | -- --  | 0 0 0 0 0 9141113 8 0 0 0 0      |
| 2  | 2555.64   | 3.67  | 1  | 64   | 55   | 5.73661E+01 | 4.37655E+01 | 3.17700E+01 | 2.0418   | 0.9629   | 0.9103   | 8.000  | 8.000  | 20666 2  | -- --  | 0 0 0 0 0 4122018 1 0 0 0 0      |
| 3  | 5167.14   | 3.67  | 1  | 64   | 55   | 5.73920E+01 | 4.38151E+01 | 3.05228E+01 | 2.0377   | -0.6814  | 1.5604   | 8.000  | 8.000  | 20666 3  | -- --  | 0 0 0 0 0 1101311 7 9 4 0 0 0    |
| 4  | 10387.80  | 3.67  | 1  | 64   | 55   | 5.77502E+01 | 4.38357E+01 | 2.89909E+01 | 2.0073   | -2.6373  | 2.5767   | 8.000  | 8.000  | 20666 4  | -- --  | 0 0 1 2 7 810 4 6 5 5 2 0 0      |
| 5  | 20828.60  | 3.67  | 1  | 64   | 55   | 5.76188E+01 | 4.38942E+01 | 2.62313E+01 | 2.3638   | -4.3434  | 3.7086   | 8.000  | 8.000  | 20666 5  | -- --  | 1 2 1 7 210 6 4 3 2 6 2 2 4      |
| 6  | 31268.85  | 3.67  | 1  | 64   | 55   | 5.78067E+01 | 4.39953E+01 | 2.36736E+01 | 2.8559   | -5.0312  | 4.3748   | 8.000  | 8.000  | 20666 6  | -- --  | 3 2 5 2 5 8 3 2 3 5 2 2 2 6      |
| 7  | 52149.95  | 3.67  | 1  | 64   | 53   | 5.79779E+01 | 4.53609E+01 | 2.03504E+01 | 3.8519   | -5.2373  | 5.5050   | 8.000  | 8.000  | 20666 7  | -- --  | 8 3 1 4 5 1 4 2 2 2 4 6 1 2 8    |
| 8  | 73030.30  | 3.67  | 1  | 64   | 55   | 5.76254E+01 | 4.39888E+01 | 1.86736E+01 | 4.1990   | -5.4117  | 6.2483   | 8.000  | 8.000  | 20666 8  | -- --  | 12 1 3 3 5 3 1 1 2 2 2 5 1 113   |
| 9  | 104351.50 | 3.67  | 1  | 64   | 51   | 5.78409E+01 | 4.69354E+01 | 1.85230E+01 | 3.7853   | -7.4705  | 6.6768   | 8.000  | 8.000  | 20666 9  | -- --  | 11 2 3 2 2 5 3 2 0 1 3 2 3 210   |
| 10 | 156553.50 | 3.67  | 1  | 64   | 48   | 5.79636E+01 | 4.94329E+01 | 1.84769E+01 | 3.6255   | -7.2474  | 6.5432   | 8.000  | 8.000  | 20666 10 | -- --  | 7 5 3 3 3 2 3 0 1 2 3 3 3 1 9    |
| 11 | 260957.00 | 3.67  | 1  | 64   | 49   | 5.79652E+01 | 4.85365E+01 | 1.88011E+01 | 2.9301   | -7.4011  | 6.5453   | 8.000  | 8.000  | 20666 11 | -- --  | 6 2 3 8 1 5 0 2 1 0 6 3 2 1 9    |
| 12 | 313156.00 | 3.67  | 1  | 64   | 49   | 5.79658E+01 | 4.85239E+01 | 1.95152E+01 | 2.9319   | -5.6866  | 5.6910   | 8.000  | 8.000  | 20666 12 | -- --  | 5 3 3 4 6 0 2 2 1 5 7 1 0 010    |
| 13 | 365357.00 | 3.67  | 1  | 64   | 47   | 5.82870E+01 | 4.96845E+01 | 2.09099E+01 | 2.9646   | -4.8782  | 5.6239   | 8.000  | 8.000  | 20666 13 | -- --  | 5 1 4 2 3 4 2 2 3 5 4 3 0 2 7    |
| 14 | 417558.00 | 3.67  | 1  | 64   | 47   | 5.82872E+01 | 4.87499E+01 | 2.11791E+01 | 2.8250   | -3.3473  | 5.3218   | 8.000  | 8.000  | 20666 14 | -- --  | 5 1 4 3 1 2 2 4 5 4 2 4 2 2 6    |
| 15 | 469759.00 | 3.67  | 1  | 64   | 46   | 5.85783E+01 | 5.06609E+01 | 2.18474E+01 | 2.7424   | -2.0575  | 4.9074   | 8.000  | 8.000  | 20666 15 | -- --  | 5 2 4 1 3 1 2 2 5 6 1 4 3 5 2    |
| 16 | 521960.00 | 3.67  | 1  | 64   | 46   | 5.84757E+01 | 5.09441E+01 | 2.14316E+01 | 2.7259   | -1.2144  | 5.4557   | 8.000  | 8.000  | 20666 16 | -- --  | 7 2 2 3 1 2 1 1 5 6 1 5 4 3 3    |
| 17 | 626364.00 | 3.67  | 1  | 64   | 43   | 5.87149E+01 | 4.87692E+01 | 2.02147E+01 | 2.5790   | 1.8025   | 6.6004   | 8.000  | 8.000  | 20666 17 | -- --  | 7 1 3 2 4 1 1 3 4 3 3 2 2 1 6    |
| 18 | 730765.50 | 3.67  | 1  | 64   | 34   | 5.88602E+01 | 5.36053E+01 | 2.15563E+01 | 2.4903   | 2.4282   | 5.1992   | 8.000  | 8.000  | 20666 18 | -- --  | 4 2 1 1 3 2 0 3 1 8 2 1 0 2 4    |
| 19 | 835167.50 | 3.67  | 1  | 64   | 29   | 5.90731E+01 | 5.49400E+01 | 2.09141E+01 | 2.2479   | 3.4940   | 5.4596   | 8.000  | 8.000  | 20666 19 | -- --  | 3 3 1 2 1 0 2 1 2 3 5 1 1 1 3    |
| 20 | 939569.50 | 3.67  | 1  | 64   | 27   | 5.92515E+01 | 5.19553E+01 | 1.80749E+01 | 2.0020   | 4.1719   | 5.2117   | 8.000  | 8.000  | 20666 20 | -- --  | 3 2 2 2 1 2 0 1 1 3 2 1 4 1 2    |

Table 3: Applied phase offsets and  $10^6 \times \chi^2$  of aux. parameters ( $B_x, B_y, \dots$  And  $\Delta$  = difference ref-sample in  $10^{-3}$  units (B:milliGauss).

| nt  | $\Delta J/\mu Tm$ | $\simeq \Delta\Phi$ | Bx  | By  | Bz  | B2x | B2y | B2z | B1x | B1y | B1z |
|-----|-------------------|---------------------|-----|-----|-----|-----|-----|-----|-----|-----|-----|
| 1   | 0.000             | 0.0000 <sup>o</sup> | 2.2 | 1.3 | 0.0 | 0.1 | 0.3 | 0.0 | 0.1 | 0.1 | 0.1 |
| 2   | 0.000             | 0.0000 <sup>o</sup> | 0.1 | 0.0 | 0.0 | 0.0 | 0.1 | 0.0 | 0.1 | 0.1 | 0.0 |
| 3   | 0.000             | 0.0000 <sup>o</sup> | 0.2 | 0.0 | 0.0 | 0.0 | 0.0 | 0.0 | 0.1 | 0.1 | 0.0 |
| 4   | 0.000             | 0.0000 <sup>o</sup> | 0.6 | 0.0 | 0.0 | 0.0 | 0.0 | 0.0 | 0.1 | 0.0 | 0.1 |
| 5   | 0.000             | 0.0000 <sup>o</sup> | 0.8 | 0.0 | 0.0 | 0.2 | 0.0 | 0.0 | 0.0 | 0.1 | 0.1 |
| 6   | 0.000             | 0.0000 <sup>o</sup> | 1.0 | 0.0 | 0.0 | 0.2 | 0.0 | 0.0 | 0.1 | 0.0 | 0.1 |
| 7   | 0.000             | 0.0000 <sup>o</sup> | 2.0 | 0.0 | 0.0 | 0.0 | 0.0 | 0.1 | 0.1 | 0.0 | 0.1 |
| 8   | 0.000             | 0.0000 <sup>o</sup> | 1.7 | 0.0 | 0.1 | 0.2 | 0.1 | 0.1 | 0.0 | 0.1 | 0.1 |
| 9   | 0.000             | 0.0000 <sup>o</sup> | 1.5 | 1.1 | 0.0 | 0.2 | 0.2 | 0.0 | 0.1 | 0.2 | 0.1 |
| 10  | 0.000             | 0.0000 <sup>o</sup> | 1.5 | 0.0 | 0.0 | 0.0 | 0.1 | 0.0 | 0.1 | 0.1 | 0.1 |
| 11  | 0.000             | 0.0000 <sup>o</sup> | 0.9 | 0.0 | 0.0 | 0.0 | 0.1 | 0.0 | 0.1 | 0.1 | 0.1 |
| 12  | 0.000             | 0.0000 <sup>o</sup> | 1.3 | 0.2 | 0.0 | 0.1 | 0.1 | 0.1 | 0.1 | 0.1 | 0.1 |
| 13  | 0.000             | 0.0000 <sup>o</sup> | 1.9 | 1.1 | 0.0 | 0.1 | 0.4 | 0.1 | 0.1 | 0.1 | 0.1 |
| 14  | 0.000             | 0.0000 <sup>o</sup> | 0.7 | 0.0 | 0.0 | 0.1 | 0.1 | 0.0 | 0.1 | 0.1 | 0.1 |
| 15  | 0.000             | 0.0000 <sup>o</sup> | 0.4 | 0.0 | 0.0 | 0.1 | 0.1 | 0.2 | 0.1 | 0.1 | 0.1 |
| 16  | 0.000             | 0.0000 <sup>o</sup> | 0.4 | 0.0 | 0.0 | 0.1 | 0.1 | 0.1 | 0.1 | 0.1 | 0.1 |
| 17  | 0.000             | 0.0000 <sup>o</sup> | 0.1 | 0.0 | 0.0 | 0.1 | 0.1 | 0.0 | 0.1 | 0.1 | 0.1 |
| 18  | 0.000             | 0.0000 <sup>o</sup> | 1.1 | 1.0 | 0.0 | 0.0 | 0.3 | 0.0 | 0.1 | 0.1 | 0.1 |
| 19  | 0.000             | 0.0000 <sup>o</sup> | 0.1 | 0.0 | 0.0 | 0.0 | 0.1 | 0.1 | 0.1 | 0.1 | 0.1 |
| 20  | 0.000             | 0.0000 <sup>o</sup> | 0.1 | 0.0 | 0.1 | 0.0 | 0.1 | 0.1 | 0.1 | 0.1 | 0.1 |
| Ave | 0.0000            | 0.0000 <sup>o</sup> | -   | -   | -   | -   | -   | -   | -   | -   | -   |
| Var | 0.0000            | 0.0000 <sup>o</sup> | -   | -   | -   | -   | -   | -   | -   | -   | -   |

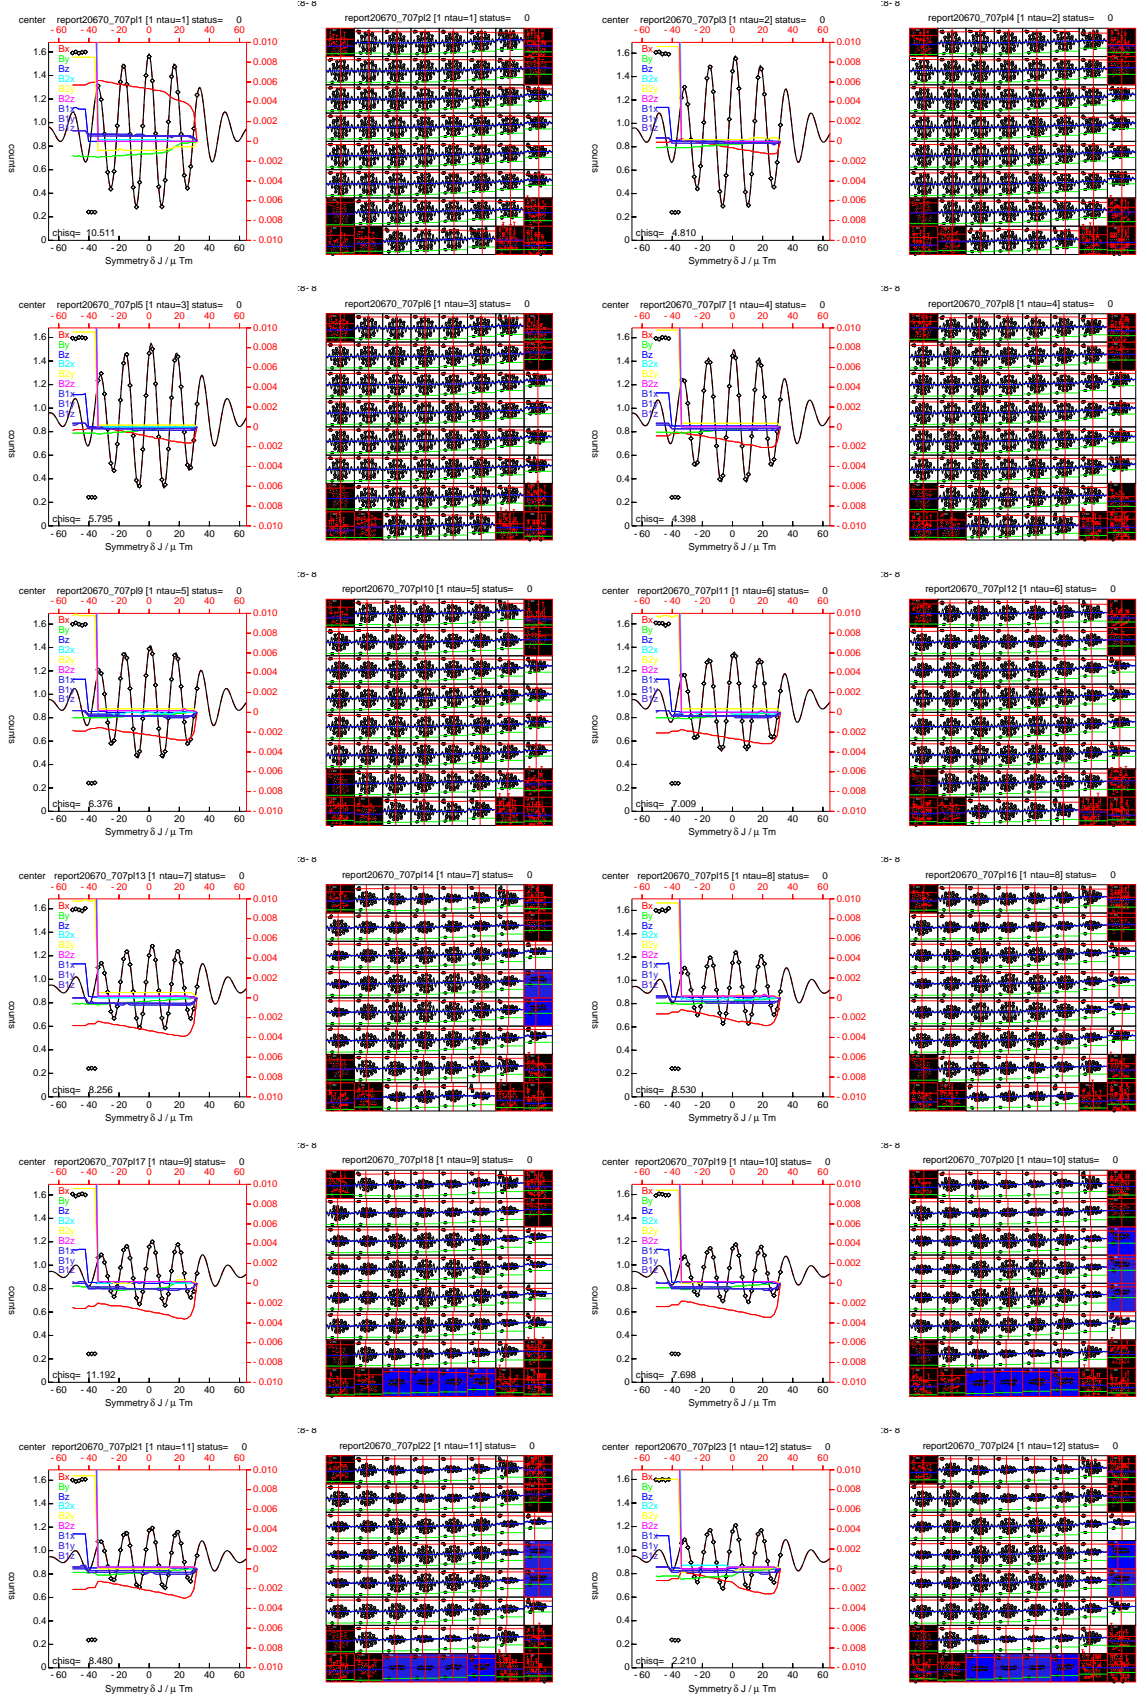

Figure 1: Center phase scan plots. Dashed red line + diamonds: scaled reference.

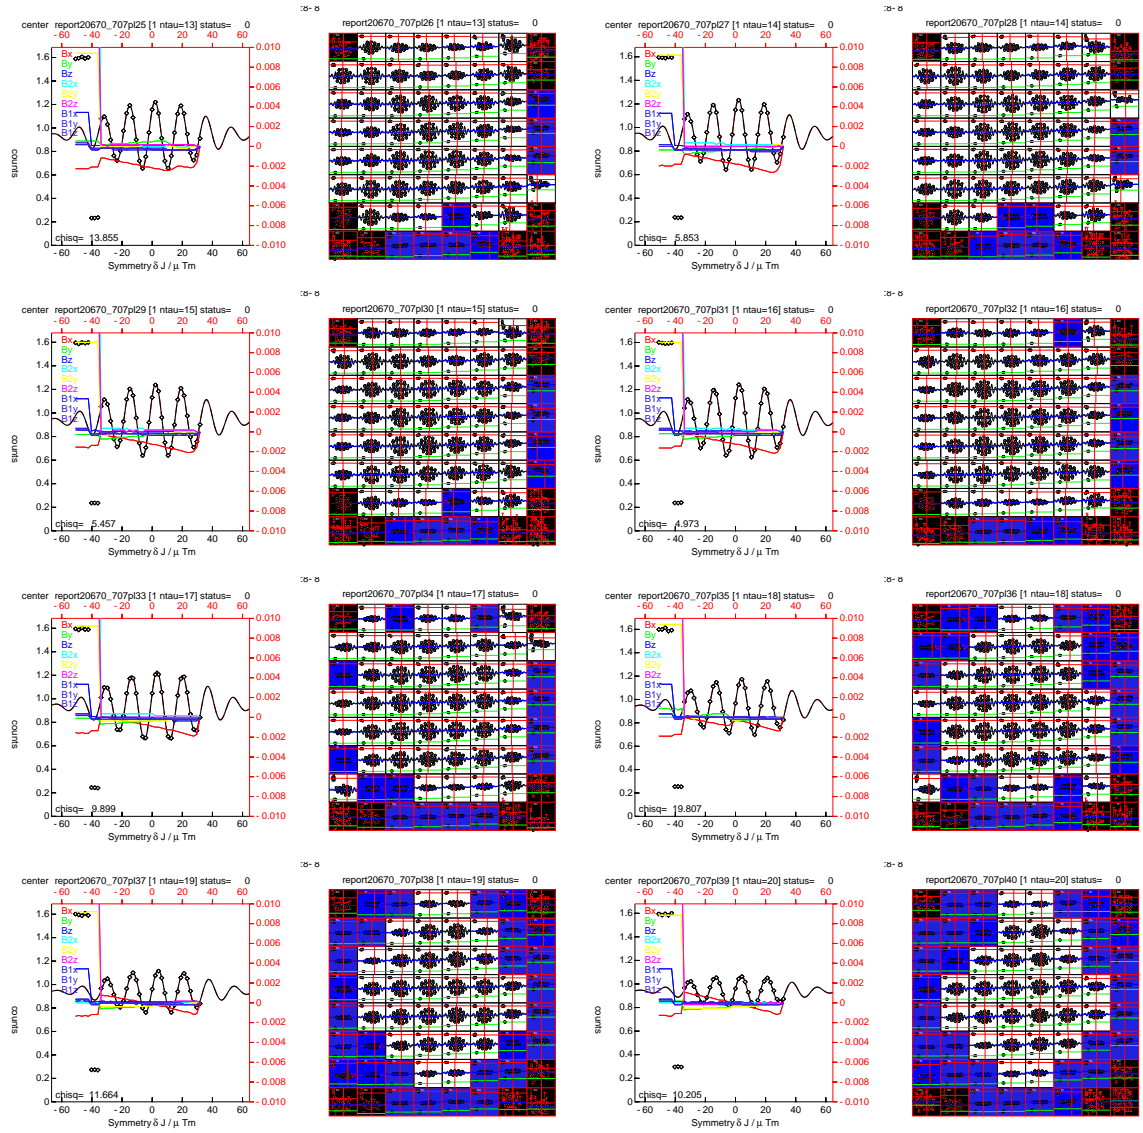

Figure 2: Continuation: Center phase scan plots. Dashed red line + diamonds: scaled reference.

|                                                                                                              |             |                                           |                                           |      |      |             |             |             |          |          |          |        |        |          |        |                                  |
|--------------------------------------------------------------------------------------------------------------|-------------|-------------------------------------------|-------------------------------------------|------|------|-------------|-------------|-------------|----------|----------|----------|--------|--------|----------|--------|----------------------------------|
| 20668                                                                                                        | m20668.echo | actC2mm Sat Jun 23                        | actC2mm "actC 2mm at                      |      |      |             |             |             |          |          |          |        |        |          |        |                                  |
| reference                                                                                                    | 20 pnts     | 23:35:32 2018                             |                                           |      |      |             |             |             |          |          |          |        |        |          |        |                                  |
|                                                                                                              |             | actC2mm "actC 2mm at sampos in spongebob" | actC2mm "actC 2mm at sampos in spongebob" |      |      |             |             |             |          |          |          |        |        |          |        |                                  |
| matching reference: 20668                                                                                    |             |                                           |                                           |      |      |             |             |             |          |          |          |        |        |          |        |                                  |
| matching background: -                                                                                       |             |                                           |                                           |      |      |             |             |             |          |          |          |        |        |          |        |                                  |
| wavelength $\lambda = 8.0000 \text{ \AA}$                                                                    |             |                                           |                                           |      |      |             |             |             |          |          |          |        |        |          |        |                                  |
| $Q/\text{\AA}^{-1} = 0.0704$ ( $2\theta = 5.1361^\circ$ $\Psi = -87.440^\circ$ )                             |             |                                           |                                           |      |      |             |             |             |          |          |          |        |        |          |        |                                  |
| Up = 34.794 Down= 4.7706                                                                                     |             |                                           |                                           |      |      |             |             |             |          |          |          |        |        |          |        |                                  |
| Normalized echo amplitude ( $J_{min}, J_{max}$ )                                                             |             |                                           |                                           |      |      |             |             |             |          |          |          |        |        |          |        |                                  |
| ( $\tau_{min} = 0.0947 \text{ ns} \cdots \tau_{max} = 89.647 \text{ ns}$ ) at detector center: 0.9965 0.6495 |             |                                           |                                           |      |      |             |             |             |          |          |          |        |        |          |        |                                  |
| #                                                                                                            | J0/muTm     | theta                                     | nt                                        | npic | nact | average0    | <average>   | <amplitu>   | dj0/muTm | dja/muTm | djv/muTm | lam1/A | lam2/A | ref pt   | bgr pt | distribution: dj-count per 1muTm |
| 1                                                                                                            | 992.78      | 5.14                                      | 1                                         | 64   | 53   | 1.99043E+01 | 1.46839E+01 | 1.07440E+01 | -0.3326  | 0.2739   | 1.2488   | 8.000  | 8.000  | 20668 1  | -- --  | 0 0 0 0 0 9131111 9 0 0 0 0 0    |
| 2                                                                                                            | 2555.62     | 5.14                                      | 1                                         | 64   | 53   | 1.97367E+01 | 1.46228E+01 | 1.04258E+01 | 2.0853   | 1.1369   | 0.8146   | 8.000  | 8.000  | 20668 2  | -- --  | 0 0 0 0 0 3122117 0 0 0 0 0 0    |
| 3                                                                                                            | 5167.15     | 5.14                                      | 1                                         | 64   | 53   | 1.98578E+01 | 1.47038E+01 | 1.00479E+01 | 1.9238   | -0.6020  | 1.4311   | 8.000  | 8.000  | 20668 3  | -- --  | 0 0 0 0 0 91410 9 9 2 0 0 0 0    |
| 4                                                                                                            | 10387.80    | 5.14                                      | 1                                         | 64   | 53   | 1.99443E+01 | 1.47013E+01 | 9.42770E+00 | 1.8498   | -2.5585  | 2.4564   | 8.000  | 8.000  | 20668 4  | -- --  | 0 0 1 1 6 910 5 5 7 2 6 1 0 0    |
| 5                                                                                                            | 20828.60    | 5.14                                      | 1                                         | 64   | 53   | 1.98512E+01 | 1.47150E+01 | 8.46855E+00 | 2.1668   | -4.2937  | 3.6218   | 8.000  | 8.000  | 20668 5  | -- --  | 1 1 2 6 4 9 6 3 3 4 3 2 3 4 2    |
| 6                                                                                                            | 31268.85    | 5.14                                      | 1                                         | 64   | 53   | 1.99540E+01 | 1.47073E+01 | 7.61948E+00 | 2.6623   | -4.9788  | 4.3291   | 8.000  | 8.000  | 20668 6  | -- --  | 2 2 5 3 4 5 7 4 1 3 5 2 2 6 1    |
| 7                                                                                                            | 52149.95    | 5.14                                      | 1                                         | 64   | 52   | 1.98128E+01 | 1.49183E+01 | 6.53963E+00 | 3.7189   | -5.0996  | 5.5841   | 8.000  | 8.000  | 20668 7  | -- --  | 8 3 1 3 5 4 1 2 2 3 7 2 1 1 9    |
| 8                                                                                                            | 73030.35    | 5.14                                      | 1                                         | 64   | 53   | 1.99486E+01 | 1.46947E+01 | 6.01409E+00 | 4.0789   | -5.1745  | 6.5089   | 8.000  | 8.000  | 20668 8  | -- --  | 11 1 3 5 3 3 1 0 2 3 3 3 0 213   |
| 9                                                                                                            | 104351.50   | 5.14                                      | 1                                         | 64   | 50   | 2.01081E+01 | 1.53936E+01 | 5.80079E+00 | 3.8648   | -6.9235  | 6.6429   | 8.000  | 8.000  | 20668 9  | -- --  | 10 2 3 3 4 3 2 1 0 2 3 3 3 011   |
| 10                                                                                                           | 156553.50   | 5.14                                      | 1                                         | 64   | 48   | 2.00913E+01 | 1.59377E+01 | 5.69090E+00 | 3.5699   | -6.2763  | 7.3972   | 8.000  | 8.000  | 20668 10 | -- --  | 12 2 3 2 2 3 0 0 2 4 2 3 0 112   |
| 11                                                                                                           | 260957.00   | 5.14                                      | 1                                         | 64   | 46   | 1.99715E+01 | 1.58463E+01 | 6.01734E+00 | 3.1360   | -6.6601  | 7.1142   | 8.000  | 8.000  | 20668 11 | -- --  | 7 3 3 4 3 1 2 1 0 3 4 4 1 010    |
| 12                                                                                                           | 313156.00   | 5.14                                      | 1                                         | 64   | 46   | 1.99806E+01 | 1.59175E+01 | 6.28476E+00 | 2.9362   | -6.3225  | 6.4299   | 8.000  | 8.000  | 20668 12 | -- --  | 5 2 2 5 5 1 2 2 1 1 6 4 1 0 9    |
| 13                                                                                                           | 365357.00   | 5.14                                      | 1                                         | 64   | 45   | 2.01129E+01 | 1.61484E+01 | 6.65269E+00 | 2.9559   | -4.2853  | 5.8699   | 8.000  | 8.000  | 20668 13 | -- --  | 5 4 1 3 4 1 1 4 3 3 6 0 1 2 7    |
| 14                                                                                                           | 417558.00   | 5.14                                      | 1                                         | 64   | 46   | 2.01473E+01 | 1.58687E+01 | 6.72008E+00 | 2.7517   | -3.5454  | 5.9673   | 8.000  | 8.000  | 20668 14 | -- --  | 5 4 3 1 1 3 2 3 5 3 4 2 2 2 6    |
| 15                                                                                                           | 469759.00   | 5.14                                      | 1                                         | 64   | 44   | 2.01701E+01 | 1.64805E+01 | 7.07439E+00 | 2.7208   | -2.3521  | 4.9182   | 8.000  | 8.000  | 20668 15 | -- --  | 4 4 2 1 2 1 4 1 6 4 2 3 5 2 3    |
| 16                                                                                                           | 521960.00   | 5.14                                      | 1                                         | 64   | 44   | 2.02780E+01 | 1.61395E+01 | 6.93977E+00 | 2.6683   | -0.8375  | 5.4906   | 8.000  | 8.000  | 20668 16 | -- --  | 6 3 1 2 2 1 1 4 6 3 1 6 1 3 4    |
| 17                                                                                                           | 626364.00   | 5.14                                      | 1                                         | 64   | 40   | 2.01450E+01 | 1.65047E+01 | 6.95806E+00 | 2.6409   | 1.2594   | 5.7966   | 8.000  | 8.000  | 20668 17 | -- --  | 6 0 5 2 2 1 2 1 5 3 3 3 2 2 3    |
| 18                                                                                                           | 730766.50   | 5.14                                      | 1                                         | 64   | 34   | 2.04302E+01 | 1.77566E+01 | 7.11444E+00 | 2.4163   | 3.0952   | 5.0262   | 8.000  | 8.000  | 20668 18 | -- --  | 4 1 1 3 2 1 2 2 7 3 2 0 2 1 3    |
| 19                                                                                                           | 835168.50   | 5.14                                      | 1                                         | 64   | 28   | 2.05208E+01 | 1.87455E+01 | 7.20477E+00 | 2.2389   | 3.5110   | 5.3087   | 8.000  | 8.000  | 20668 19 | -- --  | 4 2 0 3 0 0 2 1 3 5 3 1 0 1 3    |
| 20                                                                                                           | 939570.50   | 5.14                                      | 1                                         | 64   | 25   | 2.05438E+01 | 1.84340E+01 | 6.54465E+00 | 2.0678   | 4.1064   | 5.1959   | 8.000  | 8.000  | 20668 20 | -- --  | 2 3 1 2 1 2 0 1 1 2 3 1 3 1 2    |

Table 4: Applied phase offsets and  $10^6 \times \chi^2$  of aux. parameters ( $B_x, B_y, \dots$  And  $\Delta$  = difference ref-sample in  $10^{-3}$  units (B:milliGauss).

| nt  | $\Delta J / \mu\text{Tm}$ | $\simeq \Delta\Phi$ | Bx  | By  | Bz  | B2x | B2y | B2z | B1x | B1y | B1z |
|-----|---------------------------|---------------------|-----|-----|-----|-----|-----|-----|-----|-----|-----|
| 1   | 0.000                     | 0.0000 <sup>o</sup> | 0.4 | 0.0 | 0.0 | 0.0 | 0.0 | 0.0 | 0.1 | 0.1 | 0.1 |
| 2   | 0.000                     | 0.0000 <sup>o</sup> | 1.3 | 0.9 | 0.0 | 0.1 | 0.1 | 0.0 | 0.1 | 0.1 | 0.1 |
| 3   | 0.000                     | 0.0000 <sup>o</sup> | 0.1 | 0.0 | 0.0 | 0.0 | 0.0 | 0.0 | 0.0 | 0.1 | 0.1 |
| 4   | 0.000                     | 0.0000 <sup>o</sup> | 0.3 | 0.0 | 0.0 | 0.0 | 0.0 | 0.0 | 0.1 | 0.1 | 0.0 |
| 5   | 0.000                     | 0.0000 <sup>o</sup> | 0.9 | 0.0 | 0.0 | 0.0 | 0.0 | 0.0 | 0.1 | 0.1 | 0.1 |
| 6   | 0.000                     | 0.0000 <sup>o</sup> | 0.8 | 0.0 | 0.0 | 0.2 | 0.0 | 0.3 | 0.1 | 0.1 | 0.0 |
| 7   | 0.000                     | 0.0000 <sup>o</sup> | 1.7 | 0.4 | 0.0 | 0.0 | 0.1 | 0.1 | 0.0 | 0.1 | 0.1 |
| 8   | 0.000                     | 0.0000 <sup>o</sup> | 1.4 | 1.0 | 0.0 | 0.1 | 0.2 | 0.0 | 0.1 | 0.1 | 0.1 |
| 9   | 0.000                     | 0.0000 <sup>o</sup> | 1.3 | 0.0 | 0.0 | 0.0 | 0.0 | 0.1 | 0.1 | 0.1 | 0.1 |
| 10  | 0.000                     | 0.0000 <sup>o</sup> | 1.3 | 0.0 | 0.0 | 0.0 | 0.0 | 0.1 | 0.0 | 0.1 | 0.1 |
| 11  | 0.000                     | 0.0000 <sup>o</sup> | 0.9 | 0.0 | 0.0 | 0.1 | 0.1 | 0.0 | 0.1 | 0.1 | 0.1 |
| 12  | 0.000                     | 0.0000 <sup>o</sup> | 0.5 | 0.2 | 0.0 | 0.1 | 0.1 | 0.0 | 0.1 | 0.0 | 0.1 |
| 13  | 0.000                     | 0.0000 <sup>o</sup> | 1.2 | 1.0 | 0.0 | 0.0 | 0.4 | 0.1 | 0.1 | 0.1 | 0.1 |
| 14  | 0.000                     | 0.0000 <sup>o</sup> | 0.4 | 0.0 | 0.0 | 0.1 | 0.1 | 0.1 | 0.1 | 0.1 | 0.1 |
| 15  | 0.000                     | 0.0000 <sup>o</sup> | 0.3 | 0.0 | 0.0 | 0.1 | 0.1 | 0.0 | 0.1 | 0.1 | 0.1 |
| 16  | 0.000                     | 0.0000 <sup>o</sup> | 0.2 | 0.0 | 0.0 | 0.1 | 0.1 | 0.1 | 0.1 | 0.1 | 0.1 |
| 17  | 0.000                     | 0.0000 <sup>o</sup> | 2.9 | 3.0 | 0.0 | 0.4 | 0.6 | 0.1 | 0.1 | 0.1 | 0.1 |
| 18  | 0.000                     | 0.0000 <sup>o</sup> | 0.1 | 0.0 | 0.0 | 0.0 | 0.1 | 0.1 | 0.1 | 0.1 | 0.1 |
| 19  | 0.000                     | 0.0000 <sup>o</sup> | 0.0 | 0.0 | 0.0 | 0.0 | 0.1 | 0.1 | 0.1 | 0.1 | 0.1 |
| 20  | 0.000                     | 0.0000 <sup>o</sup> | 3.2 | 2.9 | 0.0 | 0.0 | 0.9 | 0.1 | 0.1 | 0.1 | 0.1 |
| Ave | 0.0000                    | 0.0000 <sup>o</sup> | -   | -   | -   | -   | -   | -   | -   | -   | -   |
| Var | 0.0000                    | 0.0000 <sup>o</sup> | -   | -   | -   | -   | -   | -   | -   | -   | -   |

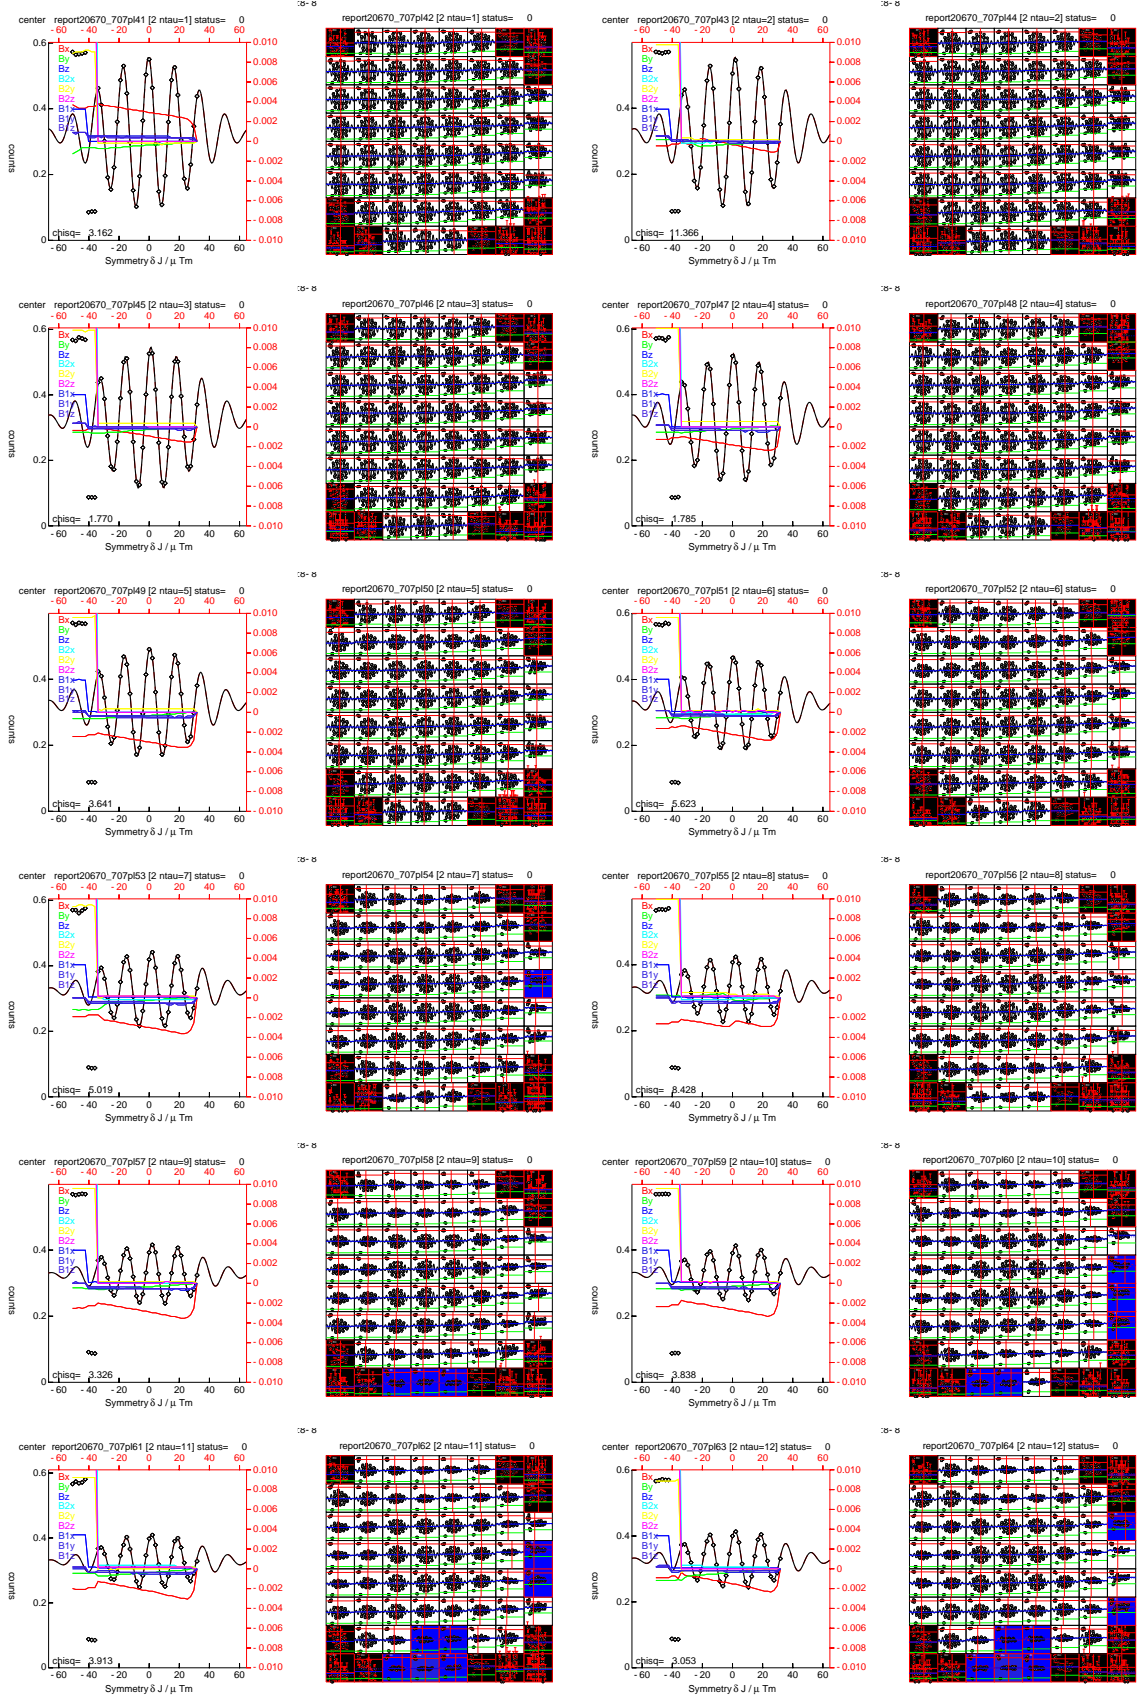

Figure 3: Center phase scan plots. Dashed red line + diamonds: scaled reference.

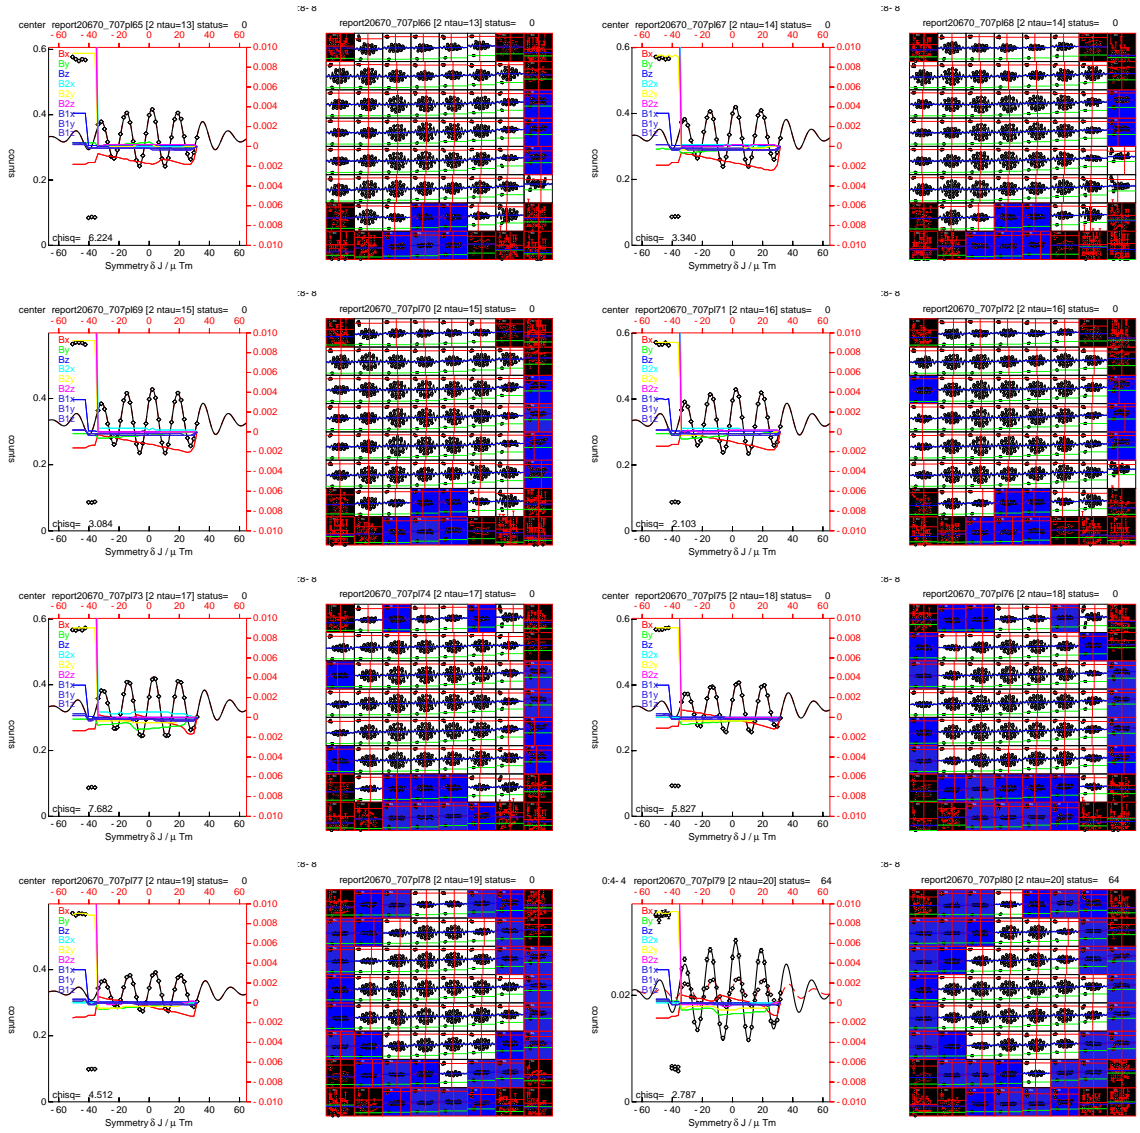

Figure 4: Continuation: Center phase scan plots. Dashed red line + diamonds: scaled reference.

|                                                                                                            |             |                    |    |               |      |                      |             |                                           |          |          |          |        |        |       |                                           |     |    |                                  |  |  |  |
|------------------------------------------------------------------------------------------------------------|-------------|--------------------|----|---------------|------|----------------------|-------------|-------------------------------------------|----------|----------|----------|--------|--------|-------|-------------------------------------------|-----|----|----------------------------------|--|--|--|
| 20669                                                                                                      | m20669.echo | actC2mm Sun Jun 24 |    |               |      | actC2mm "actC 2mm at |             |                                           |          |          |          |        |        |       |                                           |     |    |                                  |  |  |  |
| reference                                                                                                  |             | 20 pnts            |    | 04:12:03 2018 |      |                      |             | actC2mm "actC 2mm at sampos in spongebob" |          |          |          |        |        |       | actC2mm "actC 2mm at sampos in spongebob" |     |    |                                  |  |  |  |
| matching reference: 20669                                                                                  |             |                    |    |               |      |                      |             |                                           |          |          |          |        |        |       |                                           |     |    |                                  |  |  |  |
| matching background: -                                                                                     |             |                    |    |               |      |                      |             |                                           |          |          |          |        |        |       |                                           |     |    |                                  |  |  |  |
| wavelength $\lambda = 8.0000 \text{ \AA}$                                                                  |             |                    |    |               |      |                      |             |                                           |          |          |          |        |        |       |                                           |     |    |                                  |  |  |  |
| $Q/\text{\AA}^{-1} = 0.0999$ ( $2\theta = 7.2949^\circ$ $\Psi = -86.347^\circ$ )                           |             |                    |    |               |      |                      |             |                                           |          |          |          |        |        |       |                                           |     |    |                                  |  |  |  |
| Up = 13.112 Down= 1.8711                                                                                   |             |                    |    |               |      |                      |             |                                           |          |          |          |        |        |       |                                           |     |    |                                  |  |  |  |
| Normalized echo amplitude ( $J_{min}, J_{max}$ )                                                           |             |                    |    |               |      |                      |             |                                           |          |          |          |        |        |       |                                           |     |    |                                  |  |  |  |
| $(\tau_{min} = 0.0948 \text{ ns} \cdots \tau_{max} = 89.645 \text{ ns})$ at detector center: 0.9859 0.6456 |             |                    |    |               |      |                      |             |                                           |          |          |          |        |        |       |                                           |     |    |                                  |  |  |  |
| #                                                                                                          | J0/muTm     | theta              | nt | npic          | nact | average0             | <average>   | <amplitu>                                 | dj0/muTm | dja/muTm | djv/muTm | lam1/A | lam2/A | ref   | pt                                        | bgr | pt | distribution: dj-count per 1muTm |  |  |  |
| 1                                                                                                          | 993.23      | 7.29               | 1  | 64            | 51   | 7.56703E+00          | 5.80849E+00 | 4.02429E+00                               | -0.2979  | 0.3045   | 1.2166   | 8.000  | 8.000  | 20669 | 1                                         | --  | -- | 0 0 0 0 0 6141212 7 0 0 0 0 0    |  |  |  |
| 2                                                                                                          | 2555.59     | 7.29               | 1  | 64            | 51   | 7.63509E+00          | 5.82369E+00 | 3.93867E+00                               | 2.0744   | 1.3331   | 0.7488   | 8.000  | 8.000  | 20669 | 2                                         | --  | -- | 0 0 0 0 0 1132215 0 0 0 0 0 0    |  |  |  |
| 3                                                                                                          | 5167.16     | 7.29               | 1  | 64            | 51   | 7.53346E+00          | 5.83345E+00 | 3.78093E+00                               | 2.2272   | -0.0501  | 1.3182   | 8.000  | 8.000  | 20669 | 3                                         | --  | -- | 0 0 0 0 1 6131211 8 0 0 0 0 0    |  |  |  |
| 4                                                                                                          | 10387.85    | 7.29               | 1  | 64            | 51   | 7.57085E+00          | 5.81040E+00 | 3.54020E+00                               | 2.0026   | -1.7947  | 3.0613   | 8.000  | 8.000  | 20669 | 4                                         | --  | -- | 0 0 1 3 411 6 6 6 4 5 4 0 0 1    |  |  |  |
| 5                                                                                                          | 20828.60    | 7.29               | 1  | 64            | 51   | 7.60412E+00          | 5.81805E+00 | 3.16141E+00                               | 2.3073   | -3.8654  | 3.5445   | 8.000  | 8.000  | 20669 | 5                                         | --  | -- | 1 0 3 5 6 6 6 3 3 5 3 2 3 4 1    |  |  |  |
| 6                                                                                                          | 31268.85    | 7.29               | 1  | 64            | 51   | 7.55660E+00          | 5.82380E+00 | 2.86311E+00                               | 2.8171   | -4.2989  | 4.6017   | 8.000  | 8.000  | 20669 | 6                                         | --  | -- | 1 4 4 3 5 7 3 2 3 3 5 1 1 4 5    |  |  |  |
| 7                                                                                                          | 52150.05    | 7.29               | 1  | 64            | 49   | 7.58777E+00          | 5.98417E+00 | 2.52157E+00                               | 3.8811   | -4.9818  | 5.3679   | 8.000  | 8.000  | 20669 | 7                                         | --  | -- | 7 3 1 2 5 4 2 2 1 4 5 3 1 1 8    |  |  |  |
| 8                                                                                                          | 73030.40    | 7.29               | 1  | 64            | 51   | 7.61632E+00          | 5.82331E+00 | 2.23622E+00                               | 4.2608   | -5.6167  | 6.2599   | 8.000  | 8.000  | 20669 | 8                                         | --  | -- | 10 3 1 5 4 2 2 1 0 2 3 4 2 111   |  |  |  |
| 9                                                                                                          | 104351.50   | 7.29               | 1  | 64            | 49   | 7.60200E+00          | 6.00247E+00 | 2.12671E+00                               | 4.0669   | -4.9047  | 8.4014   | 8.000  | 8.000  | 20669 | 9                                         | --  | -- | 12 4 3 2 2 1 0 2 3 3 3 0 1 112   |  |  |  |
| 10                                                                                                         | 156553.50   | 7.29               | 1  | 64            | 45   | 7.49917E+00          | 6.28379E+00 | 2.12162E+00                               | 3.5711   | -7.2253  | 6.8889   | 8.000  | 8.000  | 20669 | 10                                        | --  | -- | 9 3 2 3 2 2 0 0 2 4 2 3 010      |  |  |  |
| 11                                                                                                         | 260957.50   | 7.29               | 1  | 64            | 47   | 7.58520E+00          | 6.07123E+00 | 2.11135E+00                               | 3.1873   | -6.8802  | 7.1221   | 8.000  | 8.000  | 20669 | 11                                        | --  | -- | 9 3 1 6 2 1 1 2 0 1 6 3 1 110    |  |  |  |
| 12                                                                                                         | 313156.00   | 7.29               | 1  | 64            | 43   | 7.61335E+00          | 6.18189E+00 | 2.34544E+00                               | 3.0284   | -5.3494  | 7.5802   | 8.000  | 8.000  | 20669 | 12                                        | --  | -- | 7 3 1 4 2 1 2 1 3 4 4 1 0 1 9    |  |  |  |
| 13                                                                                                         | 365357.00   | 7.29               | 1  | 64            | 44   | 7.65363E+00          | 6.25503E+00 | 2.42223E+00                               | 2.9394   | -4.4580  | 5.7699   | 8.000  | 8.000  | 20669 | 13                                        | --  | -- | 5 2 3 3 3 1 2 3 4 2 6 0 1 1 8    |  |  |  |
| 14                                                                                                         | 417557.50   | 7.29               | 1  | 64            | 44   | 7.69668E+00          | 6.25870E+00 | 2.50805E+00                               | 2.7731   | -3.3389  | 5.5160   | 8.000  | 8.000  | 20669 | 14                                        | --  | -- | 6 2 3 0 3 3 0 5 3 4 4 2 1 2 6    |  |  |  |
| 15                                                                                                         | 469758.00   | 7.29               | 1  | 64            | 45   | 7.74077E+00          | 6.13989E+00 | 2.47060E+00                               | 2.7654   | -3.2366  | 5.6990   | 8.000  | 8.000  | 20669 | 15                                        | --  | -- | 6 1 4 1 2 2 2 2 2 6 4 1 4 2 6    |  |  |  |
| 16                                                                                                         | 521958.00   | 7.29               | 1  | 64            | 46   | 7.75281E+00          | 6.15183E+00 | 2.43953E+00                               | 2.7491   | -1.5086  | 6.9071   | 8.000  | 8.000  | 20669 | 16                                        | --  | -- | 7 3 2 0 1 2 1 3 4 6 1 4 3 3 6    |  |  |  |
| 17                                                                                                         | 626359.00   | 7.29               | 1  | 64            | 40   | 7.76297E+00          | 6.32913E+00 | 2.54453E+00                               | 2.6528   | 1.7007   | 6.5086   | 8.000  | 8.000  | 20669 | 17                                        | --  | -- | 5 4 3 1 1 2 1 4 3 3 3 2 4 0 4    |  |  |  |
| 18                                                                                                         | 730756.50   | 7.29               | 1  | 64            | 35   | 7.81244E+00          | 6.71041E+00 | 2.57479E+00                               | 2.5089   | 1.7449   | 7.5527   | 8.000  | 8.000  | 20669 | 18                                        | --  | -- | 5 1 2 2 1 2 1 0 4 4 3 2 1 2 5    |  |  |  |
| 19                                                                                                         | 835151.50   | 7.29               | 1  | 64            | 30   | 7.82381E+00          | 7.18246E+00 | 2.60827E+00                               | 2.4020   | 3.4736   | 6.0583   | 8.000  | 8.000  | 20669 | 19                                        | --  | -- | 4 2 0 2 1 1 3 0 3 5 2 2 0 1 4    |  |  |  |
| 20                                                                                                         | 939545.00   | 7.29               | 1  | 64            | 26   | 7.77473E+00          | 7.08164E+00 | 2.41763E+00                               | 2.0578   | 2.9208   | 7.3365   | 8.000  | 8.000  | 20669 | 20                                        | --  | -- | 3 0 2 2 2 1 2 0 0 2 1 3 4 1 3    |  |  |  |

Table 5: Applied phase offsets and  $10^6 \times \chi^2$  of aux. parameters ( $B_x, B_y, \dots$  And  $\Delta$  = difference ref-sample in  $10^{-3}$  units (B:milliGauss).

| nt  | $\Delta J / \mu\text{Tm}$ | $\simeq \Delta\Phi$ | Bx  | By  | Bz  | B2x | B2y | B2z | B1x | B1y | B1z |
|-----|---------------------------|---------------------|-----|-----|-----|-----|-----|-----|-----|-----|-----|
| 1   | 0.000                     | 0.0000 <sup>o</sup> | 0.4 | 0.0 | 0.0 | 0.1 | 0.0 | 0.0 | 0.1 | 0.0 | 0.1 |
| 2   | 0.000                     | 0.0000 <sup>o</sup> | 0.0 | 0.0 | 0.0 | 0.2 | 0.0 | 0.1 | 0.0 | 0.1 | 0.1 |
| 3   | 0.000                     | 0.0000 <sup>o</sup> | 1.2 | 1.4 | 0.0 | 0.1 | 0.4 | 0.0 | 0.1 | 0.1 | 0.0 |
| 4   | 0.000                     | 0.0000 <sup>o</sup> | 0.3 | 0.0 | 0.0 | 0.1 | 0.1 | 0.0 | 0.0 | 0.0 | 0.1 |
| 5   | 0.000                     | 0.0000 <sup>o</sup> | 0.5 | 0.0 | 0.0 | 0.0 | 0.0 | 0.1 | 0.1 | 0.1 | 0.0 |
| 6   | 0.000                     | 0.0000 <sup>o</sup> | 0.6 | 0.0 | 0.0 | 0.1 | 0.0 | 0.0 | 0.1 | 0.1 | 0.0 |
| 7   | 0.000                     | 0.0000 <sup>o</sup> | 1.1 | 0.0 | 0.0 | 0.0 | 0.1 | 0.3 | 0.0 | 0.1 | 0.1 |
| 8   | 0.000                     | 0.0000 <sup>o</sup> | 1.4 | 1.6 | 0.0 | 0.1 | 0.3 | 0.0 | 0.1 | 0.0 | 0.1 |
| 9   | 0.000                     | 0.0000 <sup>o</sup> | 1.2 | 0.0 | 0.1 | 0.1 | 0.0 | 0.0 | 0.1 | 0.3 | 0.1 |
| 10  | 0.000                     | 0.0000 <sup>o</sup> | 0.8 | 0.0 | 0.0 | 0.1 | 0.1 | 0.0 | 0.1 | 0.0 | 0.1 |
| 11  | 0.000                     | 0.0000 <sup>o</sup> | 0.6 | 0.0 | 0.0 | 0.1 | 0.1 | 0.1 | 0.1 | 0.1 | 0.0 |
| 12  | 0.000                     | 0.0000 <sup>o</sup> | 1.6 | 0.9 | 0.1 | 0.1 | 0.2 | 0.2 | 0.2 | 0.0 | 0.0 |
| 13  | 0.000                     | 0.0000 <sup>o</sup> | 1.1 | 0.5 | 0.0 | 0.1 | 0.1 | 0.1 | 0.1 | 0.1 | 0.1 |
| 14  | 0.000                     | 0.0000 <sup>o</sup> | 0.3 | 0.0 | 0.0 | 0.1 | 0.1 | 0.2 | 0.1 | 0.1 | 0.1 |
| 15  | 0.000                     | 0.0000 <sup>o</sup> | 0.2 | 0.0 | 0.1 | 0.1 | 0.1 | 0.1 | 0.1 | 0.1 | 0.1 |
| 16  | 0.000                     | 0.0000 <sup>o</sup> | 0.2 | 0.0 | 0.0 | 0.1 | 0.1 | 0.0 | 0.1 | 0.1 | 0.1 |
| 17  | 0.000                     | 0.0000 <sup>o</sup> | 1.0 | 1.5 | 0.0 | 0.0 | 0.2 | 0.1 | 0.1 | 0.1 | 0.1 |
| 18  | 0.000                     | 0.0000 <sup>o</sup> | 0.0 | 0.0 | 0.0 | 0.0 | 0.1 | 0.1 | 0.1 | 0.1 | 0.1 |
| 19  | 0.000                     | 0.0000 <sup>o</sup> | 0.6 | 1.1 | 0.0 | 0.0 | 0.2 | 0.1 | 0.1 | 0.1 | 0.0 |
| 20  | 0.000                     | 0.0000 <sup>o</sup> | 0.1 | 0.0 | 0.0 | 0.0 | 0.3 | 0.2 | 0.1 | 0.1 | 0.1 |
| Ave | 0.0000                    | 0.0000 <sup>o</sup> | -   | -   | -   | -   | -   | -   | -   | -   | -   |
| Var | 0.0000                    | 0.0000 <sup>o</sup> | -   | -   | -   | -   | -   | -   | -   | -   | -   |

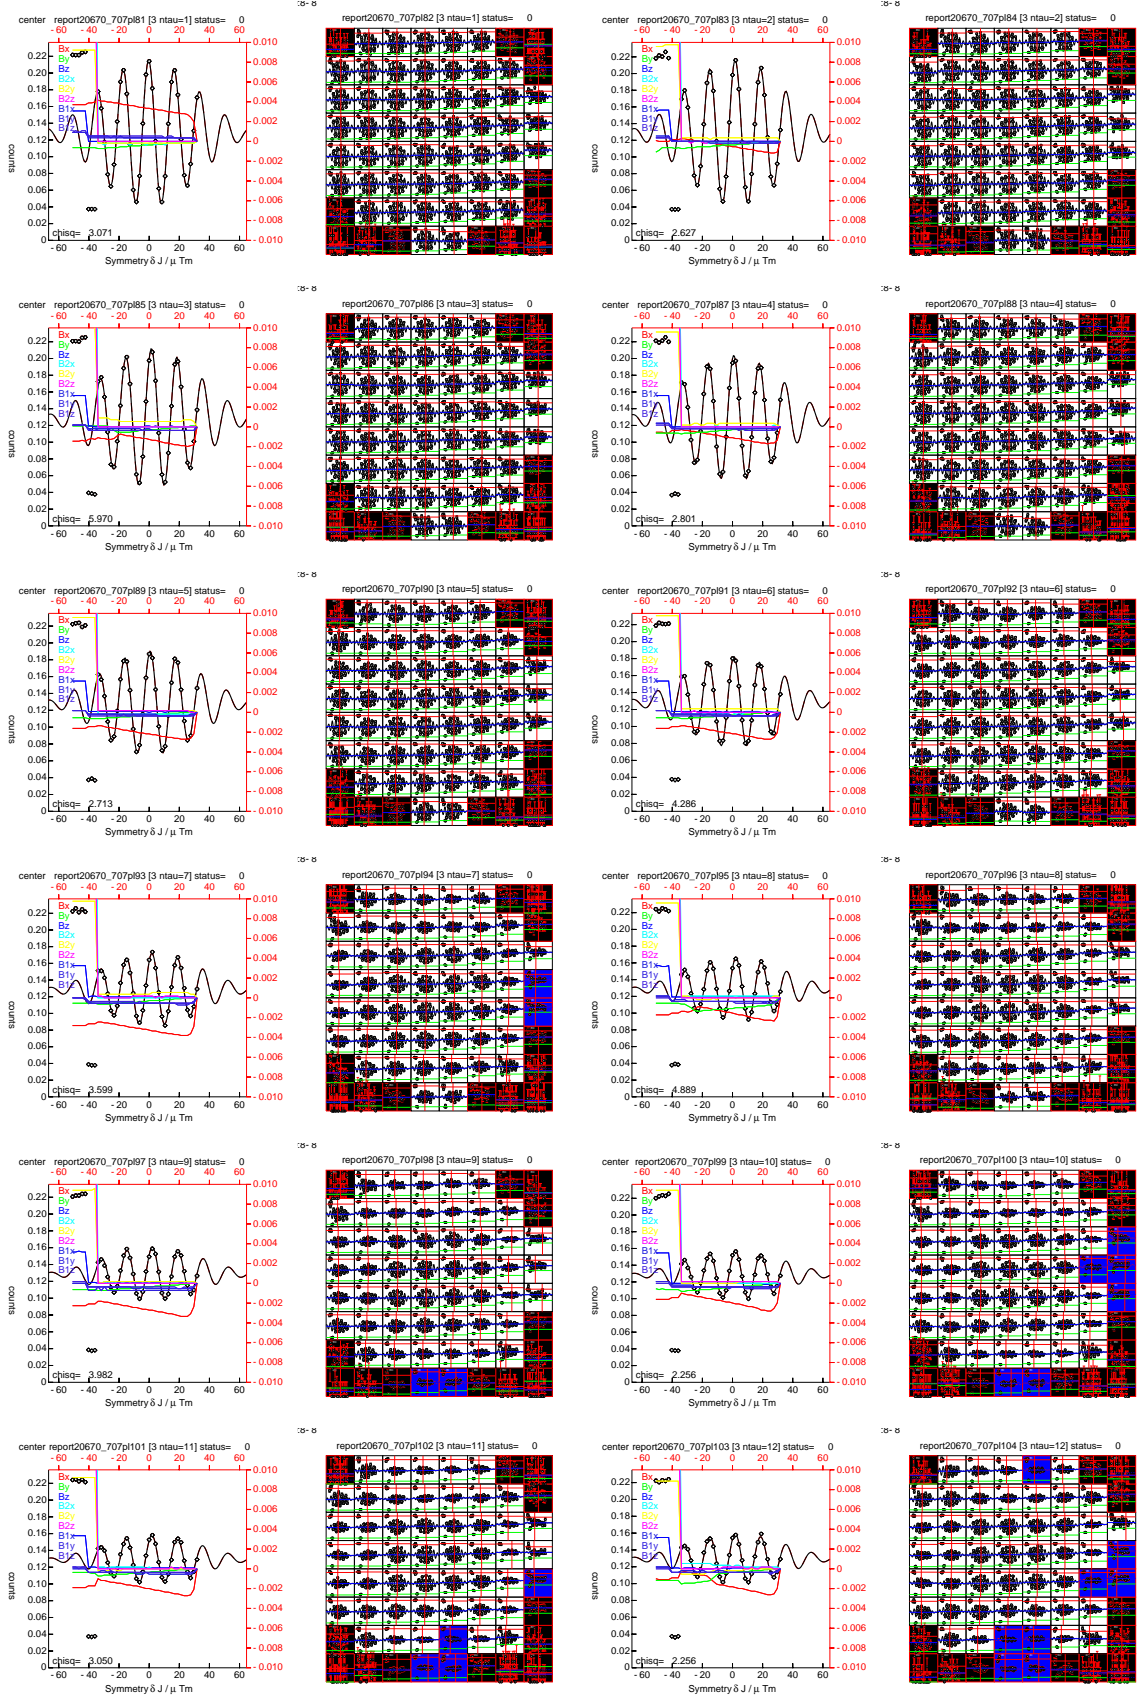

Figure 5: Center phase scan plots. Dashed red line + diamonds: scaled reference.

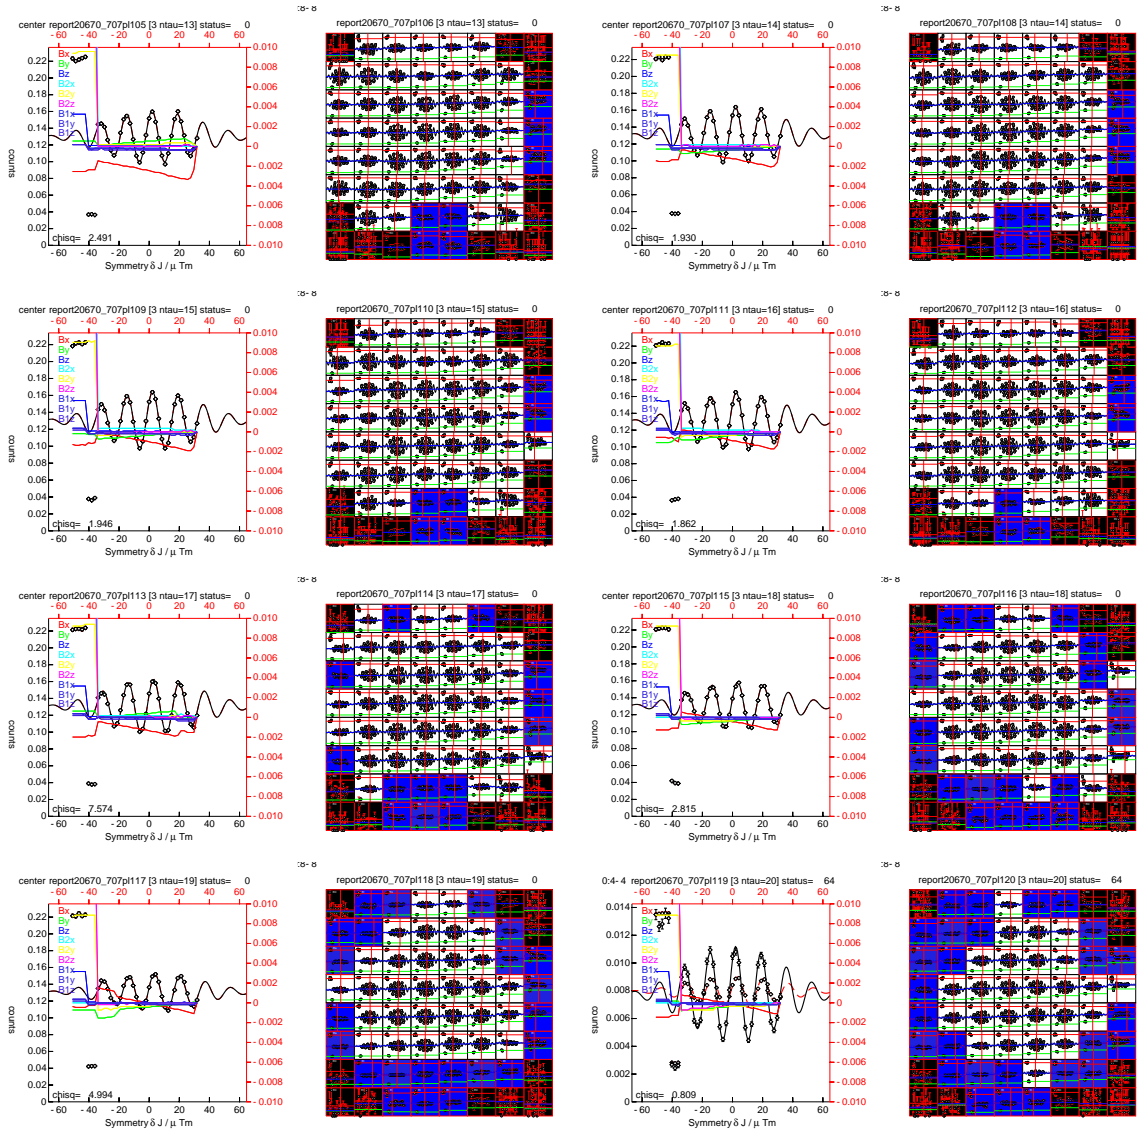

Figure 6: Continuation: Center phase scan plots. Dashed red line + diamonds: scaled reference.

|                                                                                                              |             |                    |    |      |      |                                            |             |             |          |                                            |          |        |        |          |        |                                  |  |
|--------------------------------------------------------------------------------------------------------------|-------------|--------------------|----|------|------|--------------------------------------------|-------------|-------------|----------|--------------------------------------------|----------|--------|--------|----------|--------|----------------------------------|--|
| 20676                                                                                                        | m20676.echo | actC4mm Sun Jun 24 |    |      |      | actC4mm "actC 4mm at                       |             |             |          |                                            |          |        |        |          |        |                                  |  |
|                                                                                                              |             | 21:57:58 2018      |    |      |      |                                            |             |             |          |                                            |          |        |        |          |        |                                  |  |
| reference                                                                                                    |             | 18 pnts            |    |      |      | actC4mm "actC 4mm at sampson in spongebob" |             |             |          | actC4mm "actC 4mm at sampson in spongebob" |          |        |        |          |        |                                  |  |
| matching reference: 20676                                                                                    |             |                    |    |      |      |                                            |             |             |          |                                            |          |        |        |          |        |                                  |  |
| matching background: -                                                                                       |             |                    |    |      |      |                                            |             |             |          |                                            |          |        |        |          |        |                                  |  |
| wavelength $\lambda = 8.0000 \text{ \AA}$                                                                    |             |                    |    |      |      |                                            |             |             |          |                                            |          |        |        |          |        |                                  |  |
| $Q/\text{\AA}^{-1} = 0.1499$ ( $2\theta=10.953^\circ$ $\Psi=-84.510^\circ$ )                                 |             |                    |    |      |      |                                            |             |             |          |                                            |          |        |        |          |        |                                  |  |
| Up = 25.292 Down= 2.8427                                                                                     |             |                    |    |      |      |                                            |             |             |          |                                            |          |        |        |          |        |                                  |  |
| Normalized echo amplitude ( $J_{min}, J_{max}$ )                                                             |             |                    |    |      |      |                                            |             |             |          |                                            |          |        |        |          |        |                                  |  |
| ( $\tau_{min} = 0.0948 \text{ ns} \cdots \tau_{max} = 69.725 \text{ ns}$ ) at detector center: 0.9705 0.7035 |             |                    |    |      |      |                                            |             |             |          |                                            |          |        |        |          |        |                                  |  |
| #                                                                                                            | J0/muTm     | theta              | nt | npic | nact | average0                                   | <average>   | <amplitu>   | dj0/muTm | dja/muTm                                   | djv/muTm | lam1/A | lam2/A | ref pt   | bgr pt | distribution: dj-count per 1muTm |  |
| 1                                                                                                            | 994.03      | 10.95              | 1  | 64   | 55   | 1.38382E+01                                | 9.79105E+00 | 7.42554E+00 | -0.4679  | 0.5036                                     | 1.3071   | 8.000  | 8.000  | 20676 1  | -- --  | 0 0 0 0 0 9131212 9 0 0 0 0 0    |  |
| 2                                                                                                            | 2555.51     | 10.95              | 1  | 64   | 55   | 1.37214E+01                                | 9.76068E+00 | 7.22015E+00 | 2.4473   | 1.8164                                     | 0.6463   | 8.000  | 8.000  | 20676 2  | -- --  | 0 0 0 0 0 0123013 0 0 0 0 0      |  |
| 3                                                                                                            | 5167.14     | 10.95              | 1  | 64   | 55   | 1.38256E+01                                | 9.78384E+00 | 6.94447E+00 | 2.4621   | 0.1782                                     | 1.3121   | 8.000  | 8.000  | 20676 3  | -- --  | 0 0 0 0 0 7151212 9 0 0 0 0 0    |  |
| 4                                                                                                            | 10387.85    | 10.95              | 1  | 64   | 55   | 1.37942E+01                                | 9.79217E+00 | 6.50337E+00 | 2.3077   | -1.9426                                    | 2.4590   | 8.000  | 8.000  | 20676 4  | -- --  | 0 0 1 2 6 910 5 4 8 3 6 1 0      |  |
| 5                                                                                                            | 20828.60    | 10.95              | 1  | 64   | 54   | 1.37969E+01                                | 9.94216E+00 | 5.87891E+00 | 2.6502   | -3.7143                                    | 3.6974   | 8.000  | 8.000  | 20676 5  | -- --  | 2 0 3 3 9 5 7 4 1 5 5 1 3 4 2    |  |
| 6                                                                                                            | 31268.85    | 10.95              | 1  | 64   | 55   | 1.36367E+01                                | 9.75819E+00 | 5.18672E+00 | 3.1693   | -4.5818                                    | 4.4330   | 8.000  | 8.000  | 20676 6  | -- --  | 2 3 2 7 3 7 7 3 0 5 2 4 1 2 7    |  |
| 7                                                                                                            | 52150.00    | 10.95              | 1  | 64   | 52   | 1.36878E+01                                | 1.02034E+01 | 4.60005E+00 | 4.2611   | -4.5496                                    | 6.2834   | 8.000  | 8.000  | 20676 7  | -- --  | 8 4 2 2 5 3 4 0 0 7 2 4 0 2 9    |  |
| 8                                                                                                            | 73030.30    | 10.95              | 1  | 64   | 55   | 1.37080E+01                                | 9.75920E+00 | 4.03343E+00 | 4.6080   | -5.1323                                    | 6.6503   | 8.000  | 8.000  | 20676 8  | -- --  | 10 5 0 4 5 2 3 0 0 4 2 4 1 213   |  |
| 9                                                                                                            | 104351.50   | 10.95              | 1  | 64   | 53   | 1.36464E+01                                | 1.00298E+01 | 3.76896E+00 | 4.3990   | -5.4867                                    | 8.0578   | 8.000  | 8.000  | 20676 9  | -- --  | 14 1 3 3 4 1 2 0 0 4 2 6 0 112   |  |
| 10                                                                                                           | 156553.50   | 10.95              | 1  | 64   | 49   | 1.38237E+01                                | 1.06727E+01 | 3.76406E+00 | 3.9868   | -6.4167                                    | 7.7692   | 8.000  | 8.000  | 20676 10 | -- --  | 13 1 3 3 3 2 1 0 0 5 1 4 1 111   |  |
| 11                                                                                                           | 260957.50   | 10.95              | 1  | 64   | 44   | 1.39368E+01                                | 1.09032E+01 | 4.14399E+00 | 3.1970   | -6.7456                                    | 6.9156   | 8.000  | 8.000  | 20676 11 | -- --  | 7 3 2 5 2 2 0 2 0 3 4 2 2 1 9    |  |
| 12                                                                                                           | 313156.00   | 10.95              | 1  | 64   | 45   | 1.38407E+01                                | 1.08383E+01 | 4.25468E+00 | 3.0945   | -5.8028                                    | 6.2611   | 8.000  | 8.000  | 20676 12 | -- --  | 5 4 2 3 4 3 0 2 2 4 3 3 1 0 9    |  |
| 13                                                                                                           | 365357.50   | 10.95              | 1  | 64   | 45   | 1.39059E+01                                | 1.08403E+01 | 4.42543E+00 | 3.0824   | -4.7514                                    | 5.8150   | 8.000  | 8.000  | 20676 13 | -- --  | 5 2 4 3 2 0 5 2 4 1 4 4 0 2 7    |  |
| 14                                                                                                           | 417559.00   | 10.95              | 1  | 64   | 45   | 1.39225E+01                                | 1.10185E+01 | 4.61669E+00 | 3.1370   | -3.1325                                    | 5.7710   | 8.000  | 8.000  | 20676 14 | -- --  | 7 1 1 4 2 2 1 4 3 5 3 3 1 1 7    |  |
| 15                                                                                                           | 469760.00   | 10.95              | 1  | 64   | 46   | 1.40915E+01                                | 1.07789E+01 | 4.61226E+00 | 3.0847   | -2.1874                                    | 5.8995   | 8.000  | 8.000  | 20676 15 | -- --  | 8 2 0 1 3 3 3 2 1 5 3 5 2 3 5    |  |
| 16                                                                                                           | 521961.00   | 10.95              | 1  | 64   | 45   | 1.40553E+01                                | 1.09926E+01 | 4.74909E+00 | 2.9539   | -0.9569                                    | 5.4048   | 8.000  | 8.000  | 20676 16 | -- --  | 7 2 1 2 1 2 3 4 3 4 2 3 4 2 5    |  |
| 17                                                                                                           | 626366.50   | 10.95              | 1  | 64   | 41   | 1.41124E+01                                | 1.12709E+01 | 4.84959E+00 | 2.7423   | 1.9035                                     | 6.0902   | 8.000  | 8.000  | 20676 17 | -- --  | 8 1 2 2 0 1 4 1 4 4 4 3 2 0 5    |  |
| 18                                                                                                           | 730769.50   | 10.95              | 1  | 64   | 33   | 1.41743E+01                                | 1.23428E+01 | 5.27913E+00 | 2.6495   | 3.1324                                     | 5.2175   | 8.000  | 8.000  | 20676 18 | -- --  | 4 3 1 0 3 1 2 3 2 4 3 1 2 2 2    |  |

Table 6: Applied phase offsets and  $10^6 \times \chi^2$  of aux. parameters ( $B_x, B_y, \dots$  And  $\Delta$  = difference ref-sample in  $10^{-3}$  units (B:milliGauss).

| nt  | $\Delta J / \mu\text{Tm}$ | $\simeq \Delta \Phi$ | Bx  | By  | Bz  | B2x | B2y | B2z | B1x | B1y | B1z |
|-----|---------------------------|----------------------|-----|-----|-----|-----|-----|-----|-----|-----|-----|
| 1   | 0.000                     | 0.0000 <sup>o</sup>  | 0.2 | 0.0 | 0.0 | 0.1 | 0.1 | 0.1 | 0.0 | 0.0 | 0.1 |
| 2   | 0.000                     | 0.0000 <sup>o</sup>  | 0.1 | 0.0 | 0.0 | 0.0 | 0.0 | 0.1 | 0.0 | 0.1 | 0.1 |
| 3   | 0.000                     | 0.0000 <sup>o</sup>  | 0.1 | 0.0 | 0.0 | 0.0 | 0.0 | 0.0 | 0.1 | 0.1 | 0.1 |
| 4   | 0.000                     | 0.0000 <sup>o</sup>  | 0.4 | 0.0 | 2.4 | 0.1 | 0.0 | 0.3 | 0.0 | 0.2 | 0.2 |
| 5   | 0.000                     | 0.0000 <sup>o</sup>  | 0.4 | 0.0 | 0.1 | 0.0 | 0.0 | 0.2 | 0.0 | 0.2 | 0.1 |
| 6   | 0.000                     | 0.0000 <sup>o</sup>  | 0.4 | 0.0 | 0.0 | 0.0 | 0.1 | 0.1 | 0.2 | 0.0 | 0.0 |
| 7   | 0.000                     | 0.0000 <sup>o</sup>  | 0.5 | 0.0 | 0.1 | 0.1 | 0.0 | 0.0 | 0.1 | 0.1 | 0.0 |
| 8   | 0.000                     | 0.0000 <sup>o</sup>  | 0.7 | 0.0 | 0.0 | 0.0 | 0.1 | 0.1 | 0.1 | 0.0 | 0.0 |
| 9   | 0.000                     | 0.0000 <sup>o</sup>  | 0.7 | 0.0 | 0.0 | 0.1 | 0.1 | 0.0 | 0.1 | 0.1 | 0.0 |
| 10  | 0.000                     | 0.0000 <sup>o</sup>  | 0.4 | 0.1 | 0.0 | 0.1 | 0.1 | 0.0 | 0.0 | 0.2 | 0.0 |
| 11  | 0.000                     | 0.0000 <sup>o</sup>  | 0.3 | 0.0 | 0.0 | 0.1 | 0.1 | 0.1 | 0.0 | 0.1 | 0.1 |
| 12  | 0.000                     | 0.0000 <sup>o</sup>  | 0.4 | 0.0 | 0.0 | 0.1 | 0.1 | 0.0 | 0.1 | 0.1 | 0.1 |
| 13  | 0.000                     | 0.0000 <sup>o</sup>  | 0.3 | 0.1 | 0.0 | 0.1 | 0.1 | 0.2 | 0.1 | 0.1 | 0.1 |
| 14  | 0.000                     | 0.0000 <sup>o</sup>  | 0.1 | 0.0 | 0.0 | 0.1 | 0.1 | 0.0 | 0.1 | 0.1 | 0.1 |
| 15  | 0.000                     | 0.0000 <sup>o</sup>  | 0.2 | 0.0 | 0.0 | 0.0 | 0.1 | 0.2 | 0.1 | 0.1 | 0.1 |
| 16  | 0.000                     | 0.0000 <sup>o</sup>  | 0.1 | 0.0 | 0.1 | 0.1 | 0.1 | 0.1 | 0.1 | 0.1 | 0.0 |
| 17  | 0.000                     | 0.0000 <sup>o</sup>  | 0.1 | 0.0 | 0.0 | 0.1 | 0.1 | 0.0 | 0.1 | 0.1 | 0.1 |
| 18  | 0.000                     | 0.0000 <sup>o</sup>  | 0.1 | 0.1 | 0.0 | 0.0 | 0.1 | 0.1 | 0.1 | 0.1 | 0.1 |
| Ave | 0.0000                    | 0.0000 <sup>o</sup>  | -   | -   | -   | -   | -   | -   | -   | -   | -   |
| Var | 0.0000                    | 0.0000 <sup>o</sup>  | -   | -   | -   | -   | -   | -   | -   | -   | -   |

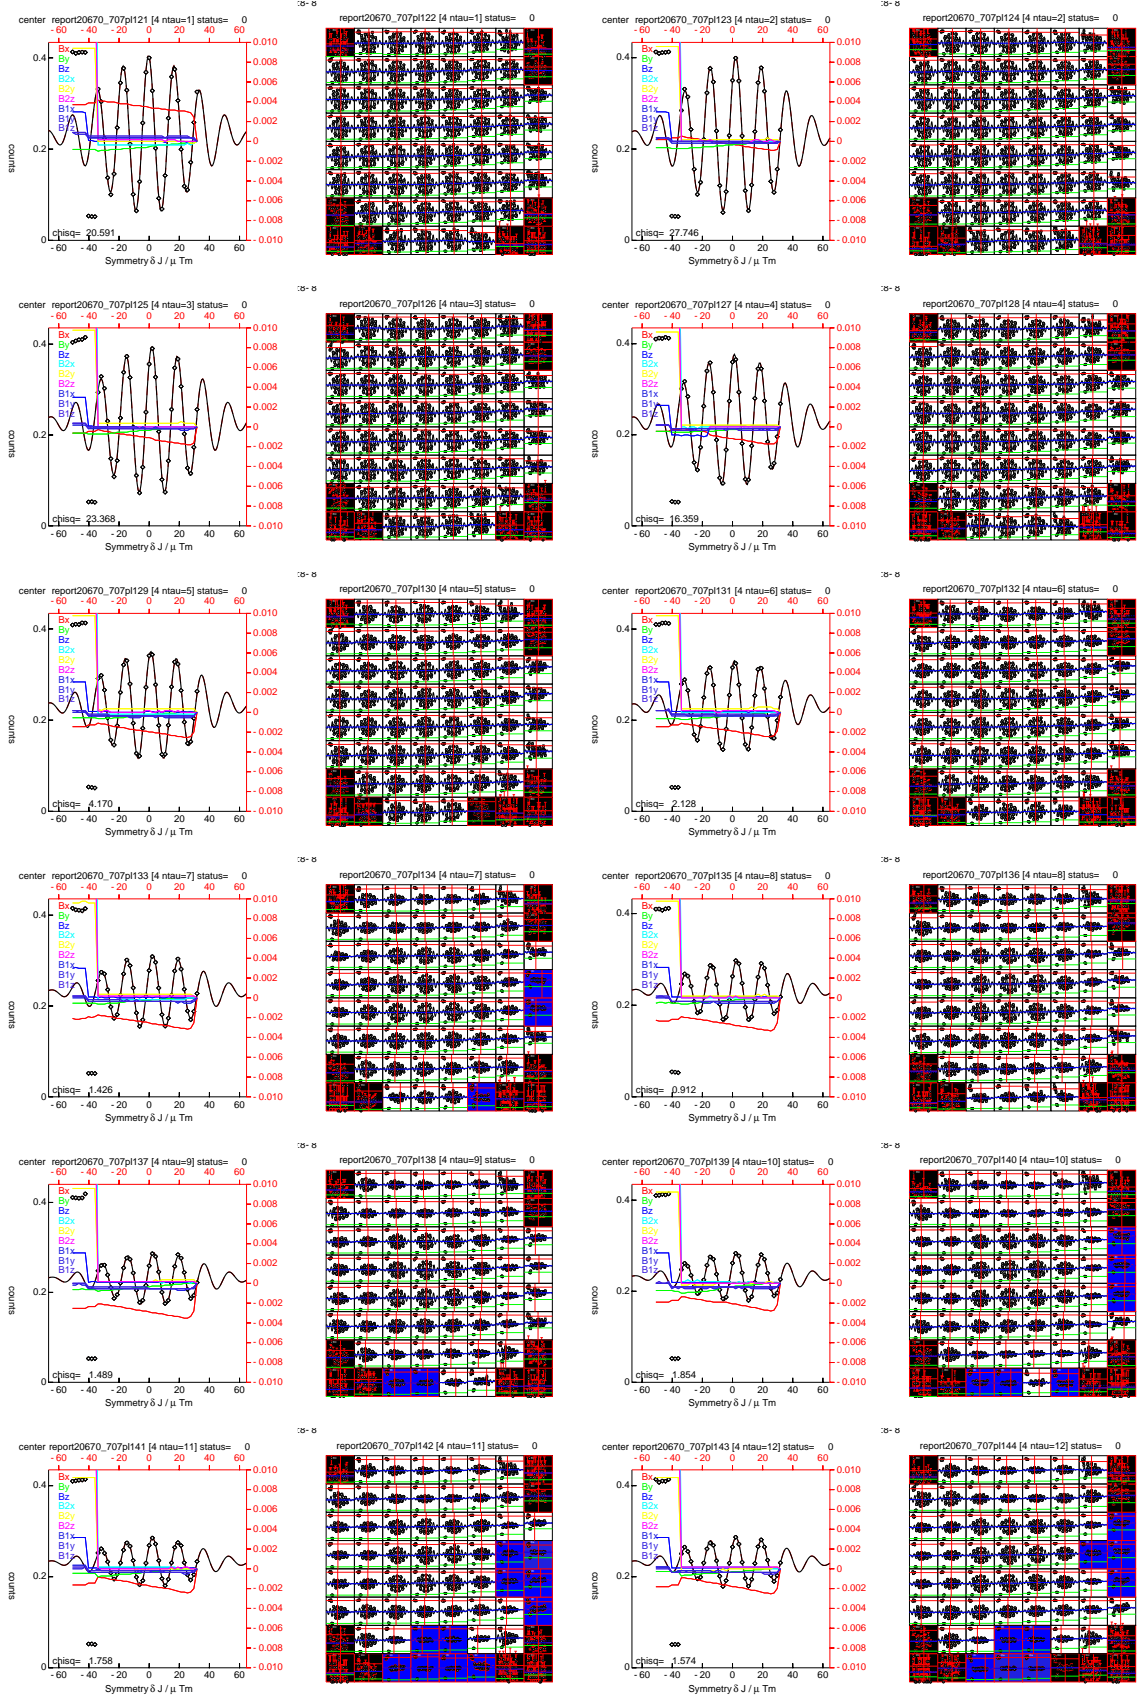

Figure 7: Center phase scan plots. Dashed red line + diamonds: scaled reference.

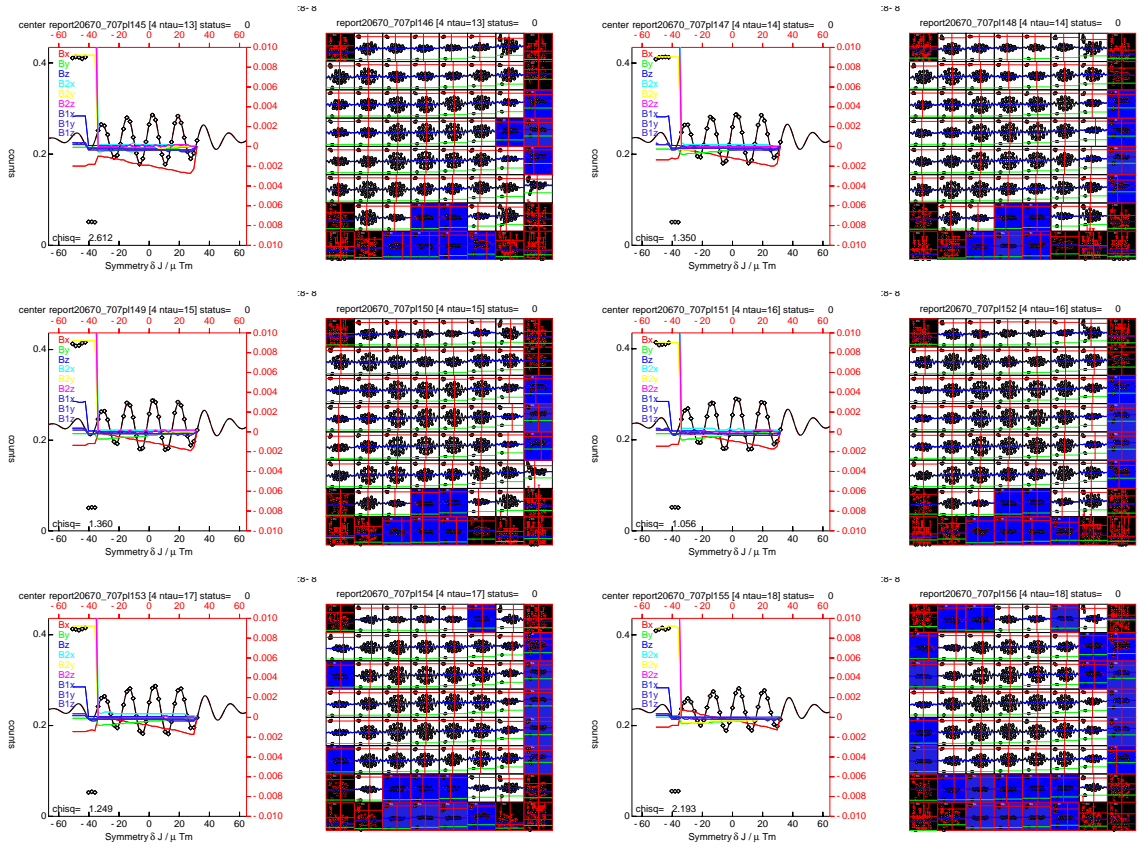

Figure 8: Continuation: Center phase scan plots. Dashed red line + diamonds: scaled reference.

20670

m20670.echo

SDS5wD2O Sun Jun 24 09:31:34 2018

SDS5wD2O "SDS with N

sample 16 pnts

SDS5wD2O "SDS with NaCl in D2O 0.05w in repos, room temp"

SDS5wD2O "SDS with NaCl in D2O 0.05w in repos, room temp"

matching reference: 20666

matching background: -

wavelength  $\lambda = 8.0000 \text{ \AA}$

$Q/\text{\AA}^{-1} = 0.0505$  ( $2\theta = 3.6859^\circ$   $\Psi = -88.185^\circ$ )

Up = 51.525 Down= 5.6819

Normalized echo amplitude ( $J_{min}, J_{max}$ )

( $\tau_{min} = 0.0947 \text{ ns} \cdots \tau_{max} = 69.724 \text{ ns}$ ) at detector center: 0.9623 0.1925

| #  | J0/μTm    | theta | nt | npic | nact | average0    | <average>   | <amplitu>   | dj0/μTm | dja/μTm | djv/μTm | lam1/Å | lam2/Å | ref pt   | bgr pt | distribution: dj-count per 1μTm |
|----|-----------|-------|----|------|------|-------------|-------------|-------------|---------|---------|---------|--------|--------|----------|--------|---------------------------------|
| 1  | 992.49    | 3.69  | 1  | 64   | 55   | 2.80896E+01 | 2.57611E+01 | 1.80748E+01 | -0.4717 | 0.0409  | 1.2311  | 8.000  | 8.000  | 20666 1  | -- --  | 0 0 0 0 0 9141113 8 0 0 0 0 0   |
| 2  | 2555.64   | 3.69  | 1  | 64   | 55   | 2.83162E+01 | 2.58594E+01 | 1.74217E+01 | 1.7685  | 0.6896  | 0.9103  | 8.000  | 8.000  | 20666 2  | -- --  | 0 0 0 0 0 4122018 1 0 0 0 0 0   |
| 3  | 5167.15   | 3.69  | 1  | 64   | 55   | 2.82693E+01 | 2.58702E+01 | 1.67510E+01 | 1.6465  | -1.0726 | 1.5604  | 8.000  | 8.000  | 20666 3  | -- --  | 0 0 0 0 0 1101311 7 9 4 0 0 0   |
| 4  | 10387.80  | 3.69  | 1  | 64   | 55   | 2.85126E+01 | 2.60216E+01 | 1.56997E+01 | 1.7843  | -2.8603 | 2.5767  | 8.000  | 8.000  | 20666 4  | -- --  | 0 0 1 2 7 810 4 6 5 5 2 0 0     |
| 5  | 20828.60  | 3.69  | 1  | 64   | 55   | 2.85164E+01 | 2.60610E+01 | 1.36302E+01 | 2.0536  | -4.6536 | 3.7086  | 8.000  | 8.000  | 20666 5  | -- --  | 1 2 1 7 210 6 4 3 2 6 2 2 3     |
| 6  | 31268.85  | 3.69  | 1  | 64   | 55   | 2.85018E+01 | 2.60676E+01 | 1.20423E+01 | 2.7065  | -5.1806 | 4.3748  | 8.000  | 8.000  | 20666 6  | -- --  | 3 2 5 2 5 8 3 2 3 5 2 2 2 6     |
| 7  | 52149.95  | 3.69  | 1  | 64   | 53   | 2.86085E+01 | 2.62573E+01 | 1.00505E+01 | 3.5965  | -5.4928 | 5.5050  | 8.000  | 8.000  | 20666 7  | -- --  | 8 3 1 4 5 1 4 2 2 2 4 6 1 2 8   |
| 8  | 73030.30  | 3.69  | 1  | 64   | 55   | 2.83144E+01 | 2.60702E+01 | 8.62696E+00 | 4.0715  | -5.5393 | 6.2483  | 8.000  | 8.000  | 20666 8  | -- --  | 12 1 3 3 5 3 1 1 2 2 2 5 1 1 13 |
| 9  | 104351.50 | 3.69  | 1  | 64   | 51   | 2.86520E+01 | 2.76164E+01 | 7.82476E+00 | 3.8972  | -7.3585 | 6.6768  | 8.000  | 8.000  | 20666 9  | -- --  | 11 2 3 2 2 5 3 2 0 1 3 2 3 2 10 |
| 10 | 156553.50 | 3.69  | 1  | 64   | 48   | 2.86799E+01 | 2.81396E+01 | 6.85538E+00 | 3.4961  | -7.3768 | 6.5432  | 8.000  | 8.000  | 20666 10 | -- --  | 7 5 3 3 3 2 3 0 1 2 3 3 3 1 9   |
| 11 | 260957.00 | 3.69  | 1  | 64   | 49   | 2.87695E+01 | 2.79268E+01 | 5.66141E+00 | 3.1313  | -7.1999 | 6.5453  | 8.000  | 8.000  | 20666 11 | -- --  | 6 2 3 8 1 5 0 2 1 0 6 3 2 1 9   |
| 12 | 313156.00 | 3.69  | 1  | 64   | 49   | 2.87502E+01 | 2.79075E+01 | 5.33536E+00 | 2.7523  | -5.8662 | 6.6910  | 8.000  | 8.000  | 20666 12 | -- --  | 5 3 3 4 6 0 2 2 1 5 7 1 0 0 10  |
| 13 | 417560.00 | 3.69  | 1  | 64   | 47   | 2.85612E+01 | 2.75106E+01 | 4.74368E+00 | 2.7866  | -3.3857 | 5.3218  | 8.000  | 8.000  | 20666 14 | -- --  | 5 1 4 3 1 2 2 4 5 4 2 4 2 2 6   |
| 14 | 521962.00 | 3.69  | 1  | 64   | 46   | 2.92092E+01 | 2.85397E+01 | 4.11802E+00 | 2.3719  | -1.5684 | 5.4557  | 8.000  | 8.000  | 20666 16 | -- --  | 7 2 2 3 1 2 1 1 5 6 1 5 4 3 3   |
| 15 | 626364.00 | 3.69  | 1  | 64   | 43   | 2.89366E+01 | 2.92106E+01 | 3.43893E+00 | 2.3007  | 1.5241  | 6.6004  | 8.000  | 8.000  | 20666 17 | -- --  | 7 1 3 2 4 1 1 3 4 3 3 2 2 1 6   |
| 16 | 730765.50 | 3.69  | 1  | 64   | 34   | 2.91007E+01 | 3.17962E+01 | 3.15239E+00 | 1.8778  | 1.8157  | 5.1992  | 8.000  | 8.000  | 20666 18 | -- --  | 4 2 1 1 3 2 0 3 1 8 2 1 0 2 4   |

Table 7: Applied phase offsets and  $10^6 \times \chi^2$  of aux. parameters ( $B_x, B_y, \dots$  And  $\Delta$  = difference ref-sample in  $10^{-3}$  units (B:milliGauss).

| nt  | $\Delta J / \mu\text{Tm}$ | $\simeq \Delta\Phi$  | Bx                | By                | Bz               | B2x              | B2y               | B2z               | B1x              | B1y              | B1z |
|-----|---------------------------|----------------------|-------------------|-------------------|------------------|------------------|-------------------|-------------------|------------------|------------------|-----|
| 1   | -0.366                    | -7.7645 <sup>o</sup> | 0.4 $\Delta$ 1.4  | 0.0 $\Delta$ 0.2  | 0.0 $\Delta$ 0.8 | 0.0 $\Delta$ 0.4 | 0.1 $\Delta$ -0.8 | 0.0 $\Delta$ -0.2 | 0.0 $\Delta$ 0.4 | 0.0 $\Delta$ 0.3 | 0.0 |
| 2   | -0.273                    | -5.8023 <sup>o</sup> | 0.0 $\Delta$ 1.8  | 0.0 $\Delta$ 0.5  | 0.0 $\Delta$ 1.0 | 0.0 $\Delta$ 0.4 | 0.0 $\Delta$ -0.6 | 0.0 $\Delta$ -0.2 | 0.0 $\Delta$ 0.5 | 0.0 $\Delta$ 0.5 | 0.1 |
| 3   | -0.391                    | -8.3065 <sup>o</sup> | 0.1 $\Delta$ 2.0  | 0.0 $\Delta$ 0.5  | 0.0 $\Delta$ 0.9 | 0.1 $\Delta$ 0.5 | 0.0 $\Delta$ -0.7 | 0.0 $\Delta$ -0.2 | 0.1 $\Delta$ 0.5 | 0.0 $\Delta$ 0.5 | 0.0 |
| 4   | -0.223                    | -4.7352 <sup>o</sup> | 0.5 $\Delta$ 2.2  | 0.0 $\Delta$ 0.5  | 0.0 $\Delta$ 0.9 | 0.0 $\Delta$ 0.5 | 0.1 $\Delta$ -0.8 | 0.0 $\Delta$ -0.4 | 0.0 $\Delta$ 0.5 | 0.0 $\Delta$ 0.5 | 0.0 |
| 5   | -0.310                    | -6.5877 <sup>o</sup> | 0.7 $\Delta$ 2.5  | 0.0 $\Delta$ 0.6  | 0.0 $\Delta$ 0.9 | 0.1 $\Delta$ 0.7 | 0.0 $\Delta$ -1.1 | 0.0 $\Delta$ -0.4 | 0.0 $\Delta$ 0.6 | 0.0 $\Delta$ 0.6 | 0.1 |
| 6   | -0.149                    | -3.1713 <sup>o</sup> | 0.7 $\Delta$ 2.4  | 0.0 $\Delta$ 0.6  | 0.0 $\Delta$ 0.9 | 0.0 $\Delta$ 0.7 | 0.0 $\Delta$ -1.1 | 0.0 $\Delta$ -0.4 | 0.1 $\Delta$ 0.6 | 0.0 $\Delta$ 0.6 | 0.0 |
| 7   | -0.255                    | -5.4237 <sup>o</sup> | 0.5 $\Delta$ 2.8  | 0.4 $\Delta$ -0.0 | 0.0 $\Delta$ 0.9 | 0.0 $\Delta$ 0.9 | 0.1 $\Delta$ -1.3 | 0.1 $\Delta$ -0.5 | 0.1 $\Delta$ 0.8 | 0.1 $\Delta$ 0.6 | 0.1 |
| 8   | -0.128                    | -2.7078 <sup>o</sup> | 3.3 $\Delta$ 2.4  | 0.5 $\Delta$ 0.3  | 0.0 $\Delta$ 0.8 | 0.0 $\Delta$ 0.9 | 0.2 $\Delta$ -1.2 | 0.0 $\Delta$ -0.4 | 0.1 $\Delta$ 0.5 | 0.1 $\Delta$ 0.5 | 0.1 |
| 9   | 0.112                     | 2.3771 <sup>o</sup>  | 1.3 $\Delta$ 2.5  | 0.0 $\Delta$ 0.1  | 0.0 $\Delta$ 0.9 | 0.0 $\Delta$ 0.8 | 0.1 $\Delta$ -1.2 | 0.0 $\Delta$ -0.4 | 0.0 $\Delta$ 0.5 | 0.1 $\Delta$ 0.5 | 0.1 |
| 10  | -0.129                    | -2.7477 <sup>o</sup> | 0.9 $\Delta$ 2.2  | 0.0 $\Delta$ -0.1 | 0.0 $\Delta$ 0.8 | 0.0 $\Delta$ 0.8 | 0.1 $\Delta$ -1.2 | 0.0 $\Delta$ -0.4 | 0.1 $\Delta$ 0.4 | 0.0 $\Delta$ 0.5 | 0.1 |
| 11  | 0.201                     | 4.2708 <sup>o</sup>  | 0.8 $\Delta$ 1.7  | 0.0 $\Delta$ 0.2  | 0.0 $\Delta$ 0.9 | 0.0 $\Delta$ 0.7 | 0.0 $\Delta$ -1.0 | 0.0 $\Delta$ -0.4 | 0.0 $\Delta$ 0.4 | 0.1 $\Delta$ 0.4 | 0.1 |
| 12  | -0.180                    | -3.8130 <sup>o</sup> | 0.6 $\Delta$ 1.2  | 0.1 $\Delta$ 0.4  | 0.0 $\Delta$ 0.9 | 0.1 $\Delta$ 0.6 | 0.0 $\Delta$ -1.0 | 0.0 $\Delta$ -0.3 | 0.1 $\Delta$ 0.4 | 0.1 $\Delta$ 0.3 | 0.0 |
| 13  | -0.038                    | -0.8151 <sup>o</sup> | 0.5 $\Delta$ 1.6  | 0.4 $\Delta$ -0.7 | 0.0 $\Delta$ 0.9 | 0.1 $\Delta$ 0.7 | 0.2 $\Delta$ -1.3 | 0.0 $\Delta$ -0.2 | 0.0 $\Delta$ 0.3 | 0.1 $\Delta$ 0.3 | 0.1 |
| 14  | -0.354                    | -7.5147 <sup>o</sup> | 0.4 $\Delta$ 0.5  | 0.0 $\Delta$ -0.0 | 0.0 $\Delta$ 1.0 | 0.0 $\Delta$ 0.5 | 0.0 $\Delta$ -1.0 | 0.0 $\Delta$ -0.2 | 0.0 $\Delta$ 0.2 | 0.0 $\Delta$ 0.3 | 0.1 |
| 15  | -0.278                    | -5.9103 <sup>o</sup> | 0.1 $\Delta$ -0.1 | 0.0 $\Delta$ -0.1 | 0.0 $\Delta$ 1.0 | 0.0 $\Delta$ 0.3 | 0.0 $\Delta$ -0.9 | 0.0 $\Delta$ -0.2 | 0.0 $\Delta$ 0.1 | 0.0 $\Delta$ 0.1 | 0.0 |
| 16  | -0.613                    | -13.005 <sup>o</sup> | 0.1 $\Delta$ -0.9 | 0.0 $\Delta$ 0.3  | 0.0 $\Delta$ 1.0 | 0.0 $\Delta$ 0.0 | 0.0 $\Delta$ -0.8 | 0.0 $\Delta$ -0.2 | 0.1 $\Delta$ 0.1 | 0.0 $\Delta$ 0.1 | 0.0 |
| Ave | -0.2109                   | -4.4786 <sup>o</sup> | -                 | -                 | -                | -                | -                 | -                 | -                | -                | -   |
| Var | 0.1905                    | 4.0453 <sup>o</sup>  | -                 | -                 | -                | -                | -                 | -                 | -                | -                | -   |

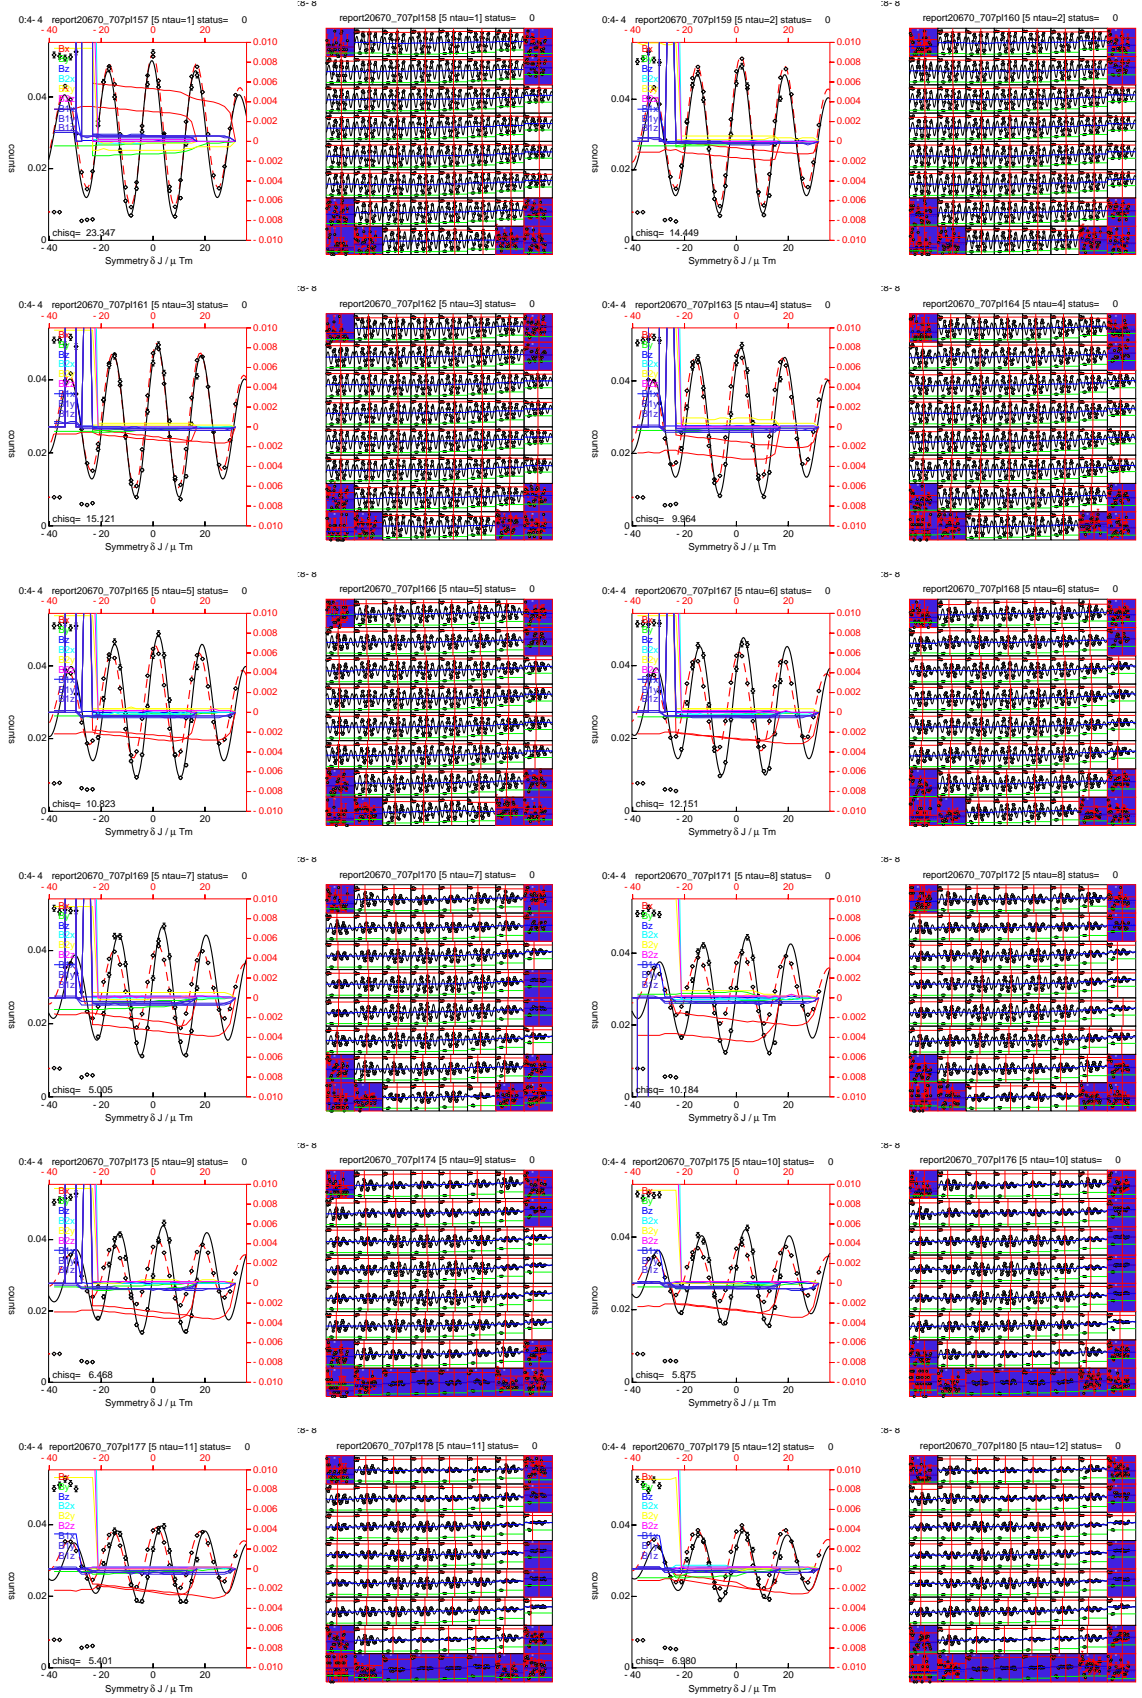

Figure 9: Center phase scan plots. Dashed red line + diamonds: scaled reference.

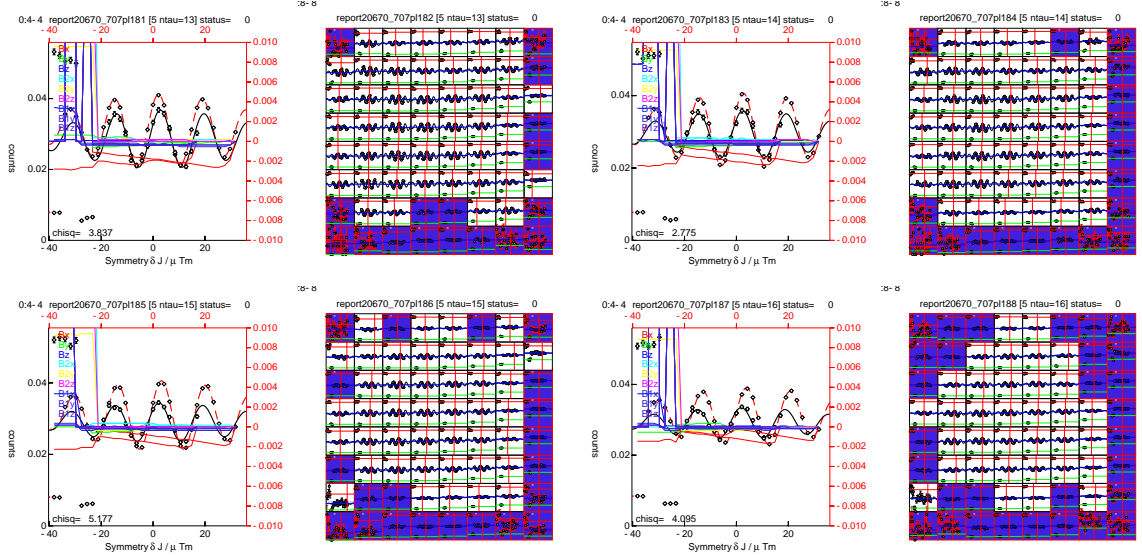

Figure 10: Continuation: Center phase scan plots. Dashed red line + diamonds: scaled reference.

20672

m20672.echo

SDS5wD2O Sun Jun 24 13:07:03 2018

SDS5wD2O "SDS with N

sample 4 pnts

SDS5wD2O "SDS with NaCl in D2O 0.05w in repos, room temp"

SDS5wD2O "SDS with NaCl in D2O 0.05w in repos, room temp"

matching reference: 20668

matching background: -

wavelength  $\lambda = 8.0000 \text{ \AA}$

$Q/\text{\AA}^{-1} = 0.0703$  ( $2\theta = 5.1279^\circ$   $\Psi = -87.440^\circ$ )

Up = 85.661 Down= 9.0535

Normalized echo amplitude ( $J_{min}, J_{max}$ )

( $\tau_{min} = 0.0947 \text{ ns} \cdots \tau_{max} = 0.9911 \text{ ns}$ ) at detector center: 0.9710 0.9132

| # | J0/muTm  | theta | nt | npic | nact | average0    | <average>   | <amplitu>   | dj0/muTm | dja/muTm | djv/muTm | lam1/A | lam2/A | ref pt  | bgr pt | distribution: dj-count per 1muTm |
|---|----------|-------|----|------|------|-------------|-------------|-------------|----------|----------|----------|--------|--------|---------|--------|----------------------------------|
| 1 | 992.78   | 5.13  | 1  | 64   | 53   | 4.64187E+01 | 3.53414E+01 | 2.57136E+01 | -0.2415  | 0.3650   | 1.2488   | 8.000  | 8.000  | 20668 1 | -- --  | 0 0 0 0 0 9131111 9 0 0 0 0 0    |
| 2 | 2555.63  | 5.13  | 1  | 64   | 53   | 4.70485E+01 | 3.54392E+01 | 2.44720E+01 | 1.6433   | 0.6948   | 0.8146   | 8.000  | 8.000  | 20668 2 | -- --  | 0 0 0 0 0 3122117 0 0 0 0 0 0    |
| 3 | 5167.16  | 5.13  | 1  | 64   | 53   | 4.73313E+01 | 3.57198E+01 | 2.37779E+01 | 1.8602   | -0.6656  | 1.4311   | 8.000  | 8.000  | 20668 3 | -- --  | 0 0 0 0 0 91410 9 9 2 0 0 0 0    |
| 4 | 10387.80 | 5.13  | 1  | 64   | 53   | 4.68750E+01 | 3.57892E+01 | 2.21164E+01 | 1.7058   | -2.7025  | 2.4564   | 8.000  | 8.000  | 20668 4 | -- --  | 0 0 1 1 6 910 5 5 7 2 6 1 0 0    |

Table 8: Applied phase offsets and  $10^6 \times \chi^2$  of aux. parameters ( $B_x, B_y, \dots$  And  $\Delta$  = difference ref-sample in  $10^{-3}$  units (B:milliGauss).

| nt  | $\Delta J / \mu Tm$ | $\simeq \Delta \Phi$ | Bx               | By               | Bz              | B2x              | B2y              | B2z              | B1x             | B1y             | B1z        |
|-----|---------------------|----------------------|------------------|------------------|-----------------|------------------|------------------|------------------|-----------------|-----------------|------------|
| 1   | 0.091               | $1.9350^0$           | <b>1.4Δ 0.6</b>  | <b>0.5Δ -0.8</b> | <b>0.0Δ 0.7</b> | <b>0.0Δ -0.0</b> | <b>0.1Δ -0.1</b> | <b>0.0</b>       | <b>0.0Δ 0.0</b> | <b>0.0Δ 0.1</b> | <b>0.0</b> |
| 2   | -0.442              | $-9.3860^0$          | <b>0.1Δ -0.4</b> | <b>0.0Δ 0.6</b>  | <b>0.0Δ 0.8</b> | <b>0.0Δ -0.3</b> | <b>0.1Δ 0.5</b>  | <b>0.0Δ 0.0</b>  | <b>0.1Δ 0.2</b> | <b>0.0Δ 0.1</b> | <b>0.0</b> |
| 3   | -0.064              | $-1.3514^0$          | <b>0.1Δ 0.2</b>  | <b>0.0Δ -0.1</b> | <b>0.0Δ 0.8</b> | <b>0.0Δ -0.2</b> | <b>0.0Δ 0.2</b>  | <b>0.0Δ 0.2</b>  | <b>0.0Δ 0.2</b> | <b>0.1Δ 0.1</b> | <b>0.0</b> |
| 4   | -0.144              | $-3.0574^0$          | <b>0.3Δ 0.4</b>  | <b>0.0Δ -0.1</b> | <b>0.5Δ 0.8</b> | <b>0.0Δ 0.0</b>  | <b>0.0</b>       | <b>0.1Δ -0.0</b> | <b>0.1Δ 0.2</b> | <b>0.1Δ 0.1</b> | <b>0.0</b> |
| Ave | -0.1396             | $-2.9650^0$          | -                | -                | -               | -                | -                | -                | -               | -               | -          |
| Var | 0.1940              | $4.1186^0$           | -                | -                | -               | -                | -                | -                | -               | -               | -          |

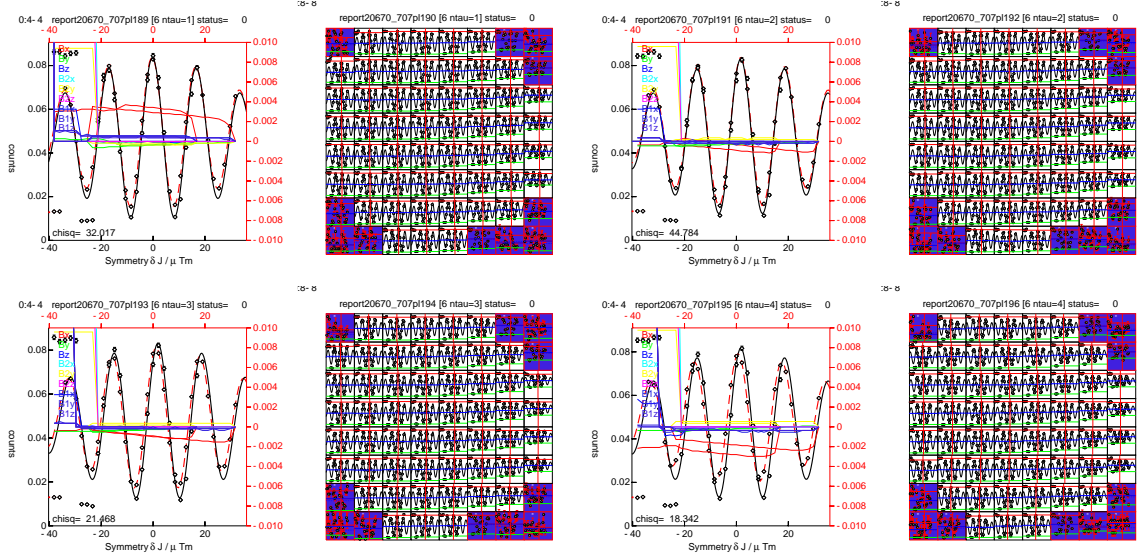

Figure 11: Center phase scan plots. Dashed red line + diamonds: scaled reference.

20673

m20673.echo

SDS5wD2O Sun Jun 24 13:50:38 2018

SDS5wD2O "SDS with N

sample 16 pnts

SDS5wD2O "SDS with NaCl in D2O 0.05w in repos, room temp"

SDS5wD2O "SDS with NaCl in D2O 0.05w in repos, room temp"

matching reference: 20668

matching background: -

wavelength  $\lambda = 8.0000 \text{ \AA}$

$Q/\text{\AA}^{-1} = 0.0703$  ( $2\theta = 5.1279^\circ$   $\Psi = -87.440^\circ$ )

Up = 84.543 Down= 8.9789

Normalized echo amplitude ( $J_{min}, J_{max}$ )

( $\tau_{min} = 0.0947 \text{ ns} \cdots \tau_{max} = 69.725 \text{ ns}$ ) at detector center: 0.9724 0.1296

| #  | J0/μTm    | theta | nt | npic | nact | average0    | <average>   | <amplitu>   | dj0/μTm | dja/μTm | djv/μTm | lam1/Å | lam2/Å | ref pt   | bgr pt | distribution: dj-count per 1μTm |
|----|-----------|-------|----|------|------|-------------|-------------|-------------|---------|---------|---------|--------|--------|----------|--------|---------------------------------|
| 1  | 992.78    | 5.13  | 1  | 64   | 53   | 4.64408E+01 | 3.54838E+01 | 2.55422E+01 | -0.2488 | 0.3577  | 1.2488  | 8.000  | 8.000  | 20668 1  | -- --  | 0 0 0 0 0 9131111 9 0 0 0 0 0   |
| 2  | 2555.63   | 5.13  | 1  | 64   | 53   | 4.66659E+01 | 3.55006E+01 | 2.44815E+01 | 1.7120  | 0.7635  | 0.8146  | 8.000  | 8.000  | 20668 2  | -- --  | 0 0 0 0 0 3122117 0 0 0 0 0 0   |
| 3  | 5167.16   | 5.13  | 1  | 64   | 53   | 4.69963E+01 | 3.56547E+01 | 2.37290E+01 | 1.8990  | -0.6268 | 1.4311  | 8.000  | 8.000  | 20668 3  | -- --  | 0 0 0 0 0 91410 9 9 2 0 0 0 0   |
| 4  | 10387.80  | 5.13  | 1  | 64   | 53   | 4.73788E+01 | 3.58689E+01 | 2.21500E+01 | 1.7667  | -2.6416 | 2.4564  | 8.000  | 8.000  | 20668 4  | -- --  | 0 0 1 1 6 910 5 5 7 2 6 1 0 0   |
| 5  | 20828.85  | 5.13  | 1  | 64   | 53   | 4.74861E+01 | 3.59895E+01 | 1.93206E+01 | 2.2487  | -4.2118 | 3.6218  | 8.000  | 8.000  | 20668 5  | -- --  | 1 1 2 6 4 9 6 3 3 4 3 2 3 4 2   |
| 6  | 31268.85  | 5.13  | 1  | 64   | 53   | 4.71933E+01 | 3.59907E+01 | 1.70136E+01 | 2.5499  | -5.0912 | 4.3291  | 8.000  | 8.000  | 20668 6  | -- --  | 2 2 5 3 4 5 7 4 1 3 5 2 2 2 6   |
| 7  | 52149.95  | 5.13  | 1  | 64   | 52   | 4.75725E+01 | 3.63402E+01 | 1.39391E+01 | 3.7614  | -5.0571 | 5.5841  | 8.000  | 8.000  | 20668 7  | -- --  | 8 3 1 3 5 4 1 2 2 3 7 2 1 1 9   |
| 8  | 73030.35  | 5.13  | 1  | 64   | 53   | 4.75236E+01 | 3.60579E+01 | 1.19990E+01 | 3.8461  | -5.4072 | 6.5089  | 8.000  | 8.000  | 20668 8  | -- --  | 11 1 3 5 3 3 1 0 2 3 3 3 0 213  |
| 9  | 104351.50 | 5.13  | 1  | 64   | 50   | 4.76617E+01 | 3.75539E+01 | 1.05181E+01 | 3.8932  | -6.8951 | 6.6429  | 8.000  | 8.000  | 20668 9  | -- --  | 10 2 3 3 4 3 2 1 0 2 3 3 3 011  |
| 10 | 156553.50 | 5.13  | 1  | 64   | 48   | 4.75506E+01 | 3.84867E+01 | 8.82869E+00 | 3.4293  | -6.4170 | 7.3972  | 8.000  | 8.000  | 20668 10 | -- --  | 12 2 3 2 2 3 0 0 2 4 2 3 0 112  |
| 11 | 260957.00 | 5.13  | 1  | 64   | 46   | 4.78091E+01 | 3.78408E+01 | 7.01052E+00 | 3.1473  | -6.6488 | 7.1142  | 8.000  | 8.000  | 20668 11 | -- --  | 7 3 3 4 3 1 2 1 0 3 4 4 1 010   |
| 12 | 313156.00 | 5.13  | 1  | 64   | 46   | 4.80181E+01 | 3.81355E+01 | 6.33053E+00 | 2.7492  | -6.5095 | 6.4299  | 8.000  | 8.000  | 20668 12 | -- --  | 5 2 2 5 5 1 2 2 1 1 6 4 1 0 9   |
| 13 | 417560.00 | 5.13  | 1  | 64   | 46   | 4.79155E+01 | 3.78575E+01 | 5.23650E+00 | 2.6776  | -3.6194 | 5.9673  | 8.000  | 8.000  | 20668 14 | -- --  | 5 4 3 1 1 3 2 3 5 3 4 2 2 2 6   |
| 14 | 521962.00 | 5.13  | 1  | 64   | 44   | 4.83860E+01 | 3.90896E+01 | 4.24596E+00 | 2.2776  | -1.2283 | 5.4906  | 8.000  | 8.000  | 20668 16 | -- --  | 6 3 1 2 2 1 1 4 6 3 1 6 1 3 4   |
| 15 | 626364.00 | 5.13  | 1  | 64   | 40   | 4.85500E+01 | 4.03624E+01 | 3.54736E+00 | 2.3212  | 0.9397  | 5.7966  | 8.000  | 8.000  | 20668 17 | -- --  | 6 0 5 2 2 1 2 1 5 3 3 3 2 2 3   |
| 16 | 730766.50 | 5.13  | 1  | 64   | 34   | 4.85518E+01 | 4.37050E+01 | 2.87154E+00 | 1.9113  | 2.5902  | 5.0262  | 8.000  | 8.000  | 20668 18 | -- --  | 4 1 1 3 2 1 2 2 7 3 2 0 2 1 3   |

Table 9: Applied phase offsets and  $10^6 \times \chi^2$  of aux. parameters ( $B_x, B_y, \dots$  And  $\Delta$  = difference ref-sample in  $10^{-3}$  units (B:milliGauss).

| nt  | $\Delta J / \mu Tm$ | $\approx \Delta \Phi$ | Bx        | By        | Bz        | B2x       | B2y       | B2z       | B1x       | B1y       | B1z |
|-----|---------------------|-----------------------|-----------|-----------|-----------|-----------|-----------|-----------|-----------|-----------|-----|
| 1   | 0.084               | 1.7794 <sup>o</sup>   | 2.1Δ -0.1 | 0.5Δ -0.6 | 0.0Δ -0.2 | 0.0Δ -0.4 | 0.0Δ 0.4  | 0.0Δ -0.2 | 0.0Δ -0.1 | 0.0Δ -0.1 | 0.1 |
| 2   | -0.373              | -7.9275 <sup>o</sup>  | 0.1Δ -1.0 | 0.0Δ 0.7  | 0.0Δ -0.1 | 0.0Δ -0.7 | 0.0Δ 0.9  | 0.0Δ -0.2 | 0.1Δ -0.0 | 0.0Δ -0.1 | 0.0 |
| 3   | -0.025              | -0.5266 <sup>o</sup>  | 0.1Δ -0.4 | 0.0Δ 0.0  | 0.0Δ -0.1 | 0.1Δ -0.5 | 0.1Δ 0.6  | 0.0Δ -0.2 | 0.0Δ 0.0  | 0.1Δ -0.1 | 0.0 |
| 4   | -0.083              | -1.7630 <sup>o</sup>  | 0.4Δ -0.2 | 0.0Δ -0.0 | 0.0Δ -0.1 | 0.0Δ -0.4 | 0.0Δ 0.5  | 0.0Δ -0.2 | 0.1Δ -0.1 | 0.0Δ -0.1 | 0.0 |
| 5   | 0.082               | 1.7373 <sup>o</sup>   | 0.5Δ -0.0 | 0.0Δ 0.0  | 0.0Δ -0.1 | 0.1Δ -0.2 | 0.0Δ 0.4  | 0.0Δ -0.2 | 0.0Δ 0.0  | 0.1Δ -0.0 | 0.0 |
| 6   | -0.112              | -2.3867 <sup>o</sup>  | 0.7Δ -0.2 | 0.0Δ 0.0  | 0.0Δ -0.2 | 0.0Δ -0.2 | 0.0Δ 0.5  | 0.0Δ -0.3 | 0.0Δ -0.1 | 0.0Δ -0.0 | 0.1 |
| 7   | 0.042               | 0.9017 <sup>o</sup>   | 0.9Δ -0.2 | 0.0Δ 0.0  | 0.0Δ -0.2 | 0.0Δ -0.6 | 0.1Δ 0.7  | 0.0Δ -0.2 | 0.0Δ 0.0  | 0.1Δ -0.1 | 0.0 |
| 8   | -0.233              | -4.9413 <sup>o</sup>  | 1.0Δ -0.6 | 0.0Δ 0.3  | 1.5Δ 0.5  | 0.0Δ -0.3 | 0.0Δ 0.6  | 0.5Δ -0.0 | 0.1Δ 0.0  | 0.1Δ 0.0  | 0.1 |
| 9   | 0.028               | 0.6017 <sup>o</sup>   | 1.1Δ -0.1 | 0.0Δ -0.2 | 0.0Δ 0.7  | 0.0Δ 0.0  | 0.0Δ 0.4  | 0.1Δ 0.0  | 0.0Δ 0.0  | 0.0Δ 0.1  | 0.1 |
| 10  | -0.141              | -2.9860 <sup>o</sup>  | 1.1Δ 0.0  | 0.0Δ -0.3 | 0.0Δ 0.7  | 0.0Δ 0.2  | 0.0Δ 0.0  | 0.0Δ -0.1 | 0.1Δ 0.0  | 0.0Δ 0.1  | 0.0 |
| 11  | 0.011               | 0.2398 <sup>o</sup>   | 0.7Δ 0.0  | 0.0Δ -0.3 | 0.0Δ 0.7  | 0.0Δ 0.2  | 0.0Δ -0.1 | 0.0Δ -0.2 | 0.0Δ 0.1  | 0.1Δ 0.0  | 0.0 |
| 12  | -0.187              | -3.9713 <sup>o</sup>  | 0.7Δ -0.2 | 0.0Δ -0.3 | 0.0Δ 0.7  | 0.1Δ 0.1  | 0.0Δ 0.1  | 0.0Δ -0.2 | 0.1Δ 0.0  | 0.1Δ 0.0  | 0.0 |
| 13  | -0.074              | -1.5720 <sup>o</sup>  | 0.4Δ -0.4 | 0.0Δ -0.2 | 0.0Δ 0.7  | 0.1Δ -0.1 | 0.0Δ 0.1  | 0.0Δ -0.1 | 0.1Δ 0.0  | 0.0Δ 0.0  | 0.0 |
| 14  | -0.391              | -8.2958 <sup>o</sup>  | 0.2Δ -0.3 | 0.0Δ -0.2 | 0.0Δ 0.7  | 0.1Δ 0.1  | 0.0Δ -0.2 | 0.1Δ -0.2 | 0.1Δ 0.0  | 0.0Δ 0.0  | 0.1 |
| 15  | -0.320              | -6.7881 <sup>o</sup>  | 0.1Δ -0.9 | 0.0Δ 0.3  | 0.0Δ 0.7  | 0.0Δ -0.2 | 0.1Δ -0.2 | 0.0Δ -0.2 | 0.0Δ 0.0  | 0.0Δ 0.0  | 0.0 |
| 16  | -0.505              | -10.722 <sup>o</sup>  | 0.0Δ -0.7 | 0.0Δ 0.0  | 0.0Δ 0.7  | 0.0Δ 0.0  | 0.0Δ -0.2 | 0.0Δ -0.0 | 0.0Δ 0.0  | 0.0Δ -0.0 | 0.0 |
| Ave | -0.1372             | -2.9138 <sup>o</sup>  | -         | -         | -         | -         | -         | -         | -         | -         | -   |
| Var | 0.1766              | 3.7494 <sup>o</sup>   | -         | -         | -         | -         | -         | -         | -         | -         | -   |

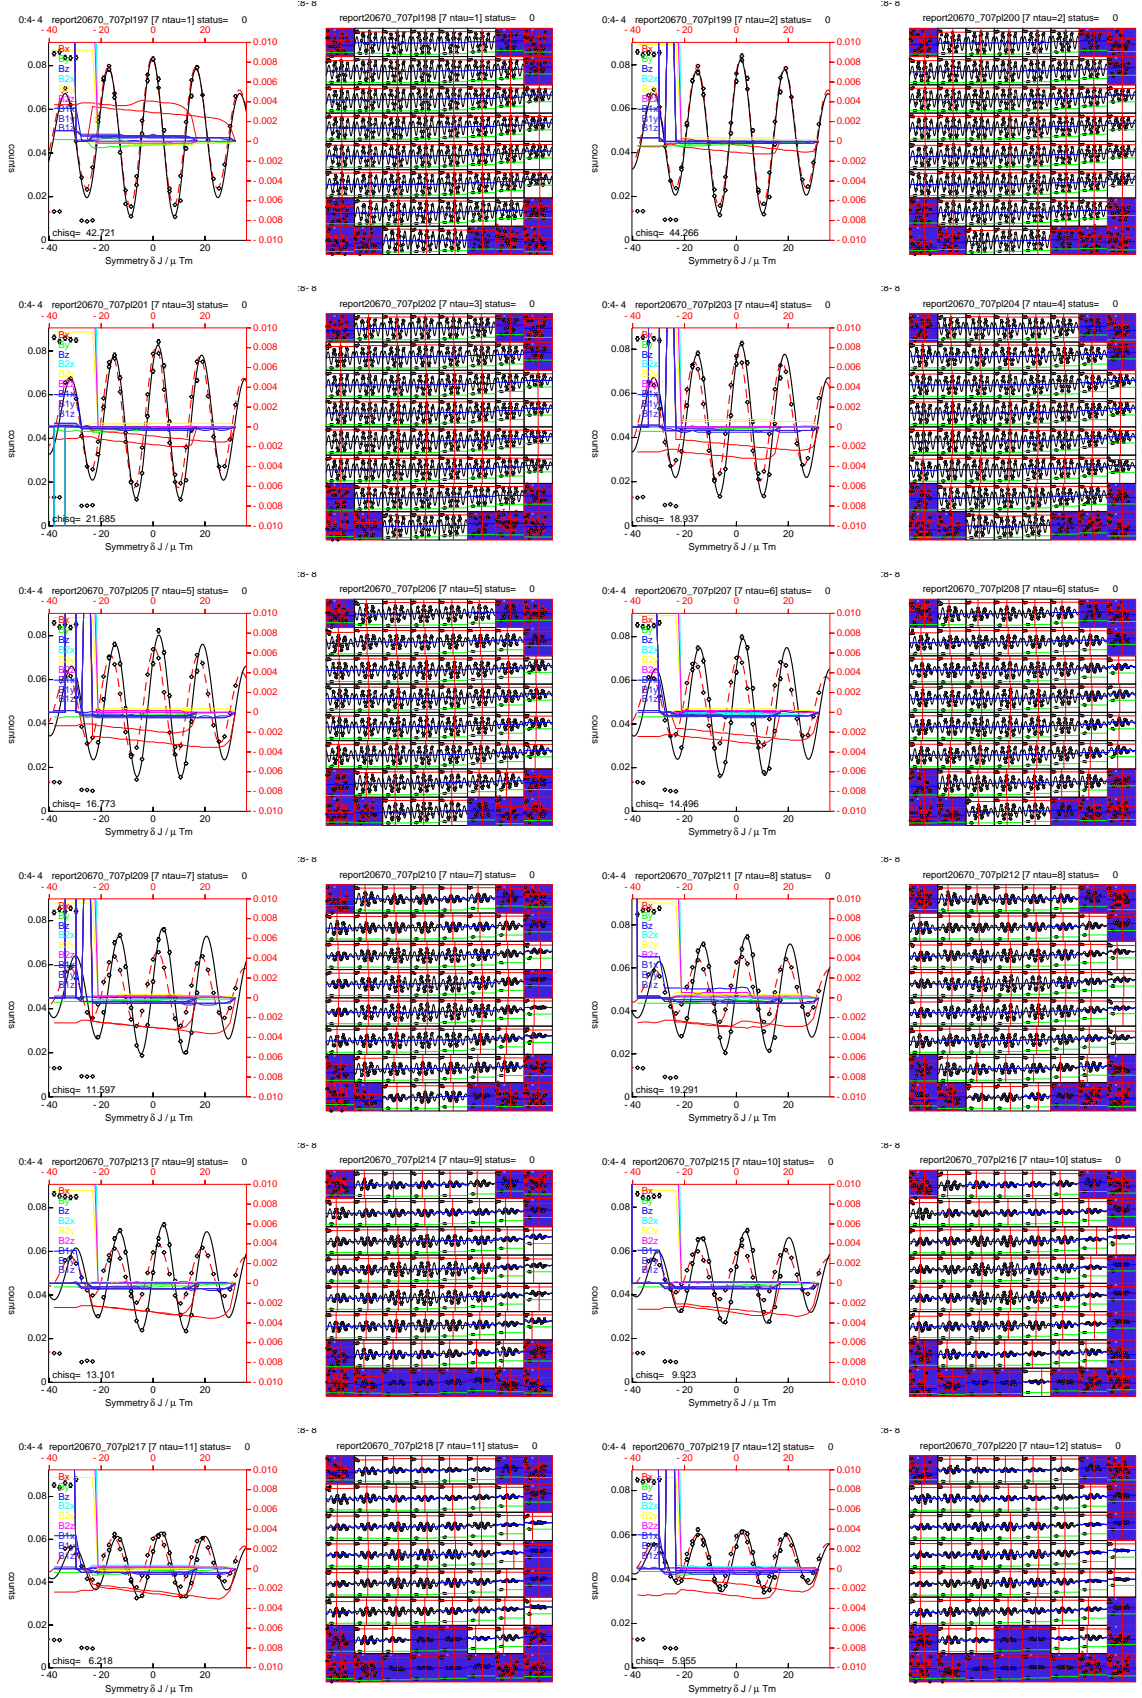

Figure 12: Center phase scan plots. Dashed red line + diamonds: scaled reference.

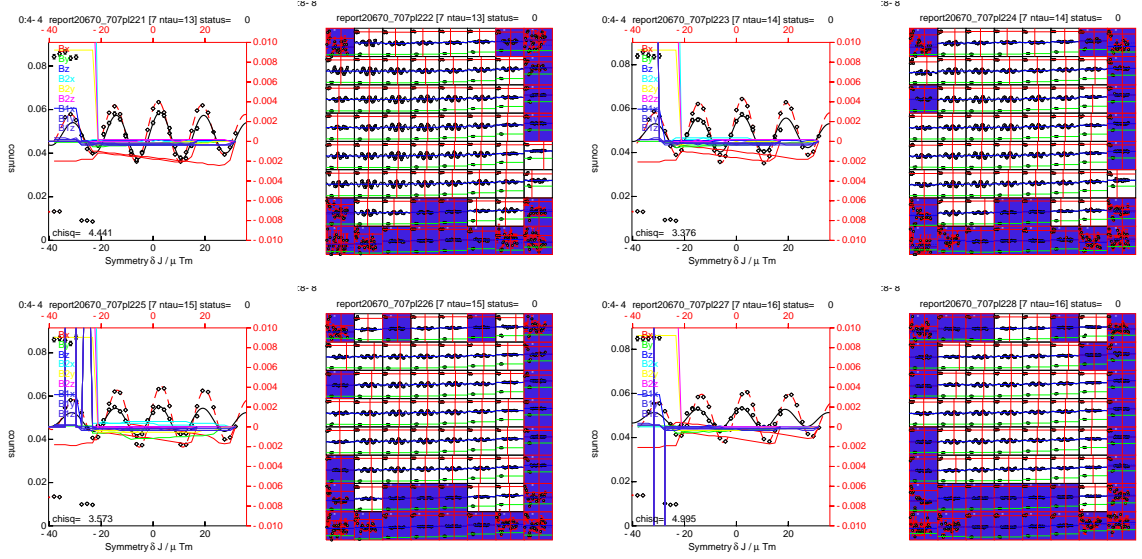

Figure 13: Continuation: Center phase scan plots. Dashed red line + diamonds: scaled reference.

20674

m20674.echo

SDS5wD2O Sun Jun 24 16:23:23 2018

SDS5wD2O "SDS with N

sample 16 pnts

SDS5wD2O "SDS with NaCl in D2O 0.05w in repos, room temp"

SDS5wD2O "SDS with NaCl in D2O 0.05w in repos, room temp"

matching reference: 20669

matching background: -

wavelength  $\lambda = 8.0000 \text{ \AA}$

$Q/\text{\AA}^{-1} = 0.1002$  ( $2\theta = 7.3114^\circ$   $\Psi = -86.347^\circ$ )

Up = 70.828 Down= 8.1545

Normalized echo amplitude ( $J_{min}, J_{max}$ )

( $\tau_{min} = 0.0948 \text{ ns} \cdots \tau_{max} = 69.724 \text{ ns}$ ) at detector center: 0.9719 0.0269

| #  | J0/μTm    | theta | nt | npic | nact | average0    | <average>   | <amplitu>   | dj0/μTm | dja/μTm | djv/μTm | lam1/A | lam2/A | ref pt   | bgr pt | distribution: dj-count per 1μTm |
|----|-----------|-------|----|------|------|-------------|-------------|-------------|---------|---------|---------|--------|--------|----------|--------|---------------------------------|
| 1  | 993.24    | 7.31  | 1  | 64   | 51   | 3.92899E+01 | 2.85032E+01 | 2.10444E+01 | -0.4986 | 0.1038  | 1.2166  | 8.000  | 8.000  | 20669 1  | -- --  | 0 0 0 0 0 6141212 7 0 0 0 0 0   |
| 2  | 2555.60   | 7.31  | 1  | 64   | 51   | 3.91736E+01 | 2.85758E+01 | 2.04032E+01 | 1.9827  | 1.2415  | 0.7488  | 8.000  | 8.000  | 20669 2  | -- --  | 0 0 0 0 0 1132215 0 0 0 0 0 0   |
| 3  | 5167.16   | 7.31  | 1  | 64   | 51   | 3.91481E+01 | 2.85571E+01 | 1.92093E+01 | 1.8389  | -0.4384 | 1.3182  | 8.000  | 8.000  | 20669 3  | -- --  | 0 0 0 0 1 6131211 8 0 0 0 0 0   |
| 4  | 10387.85  | 7.31  | 1  | 64   | 51   | 3.96114E+01 | 2.87158E+01 | 1.78125E+01 | 1.9496  | -1.8477 | 3.0613  | 8.000  | 8.000  | 20669 4  | -- --  | 0 0 1 3 411 6 6 6 4 5 4 0 0 1   |
| 5  | 20828.60  | 7.31  | 1  | 64   | 51   | 3.92431E+01 | 2.87898E+01 | 1.50875E+01 | 2.1599  | -4.0128 | 3.5445  | 8.000  | 8.000  | 20669 5  | -- --  | 1 0 3 5 6 6 6 3 3 5 3 2 3 4 1   |
| 6  | 31268.85  | 7.31  | 1  | 64   | 51   | 3.93433E+01 | 2.87907E+01 | 1.29329E+01 | 2.8149  | -4.3010 | 4.6017  | 8.000  | 8.000  | 20669 6  | -- --  | 1 4 4 3 5 7 3 2 3 3 5 1 1 4 5   |
| 7  | 52150.05  | 7.31  | 1  | 64   | 49   | 3.94142E+01 | 2.96184E+01 | 1.01796E+01 | 3.6945  | -5.1685 | 5.3679  | 8.000  | 8.000  | 20669 7  | -- --  | 7 3 1 2 5 4 2 2 1 4 5 3 1 1 8   |
| 8  | 73030.40  | 7.31  | 1  | 64   | 51   | 3.94896E+01 | 2.88153E+01 | 8.21676E+00 | 3.9705  | -5.9071 | 6.2599  | 8.000  | 8.000  | 20669 8  | -- --  | 10 3 1 5 4 2 2 1 0 2 3 4 2 11   |
| 9  | 104351.50 | 7.31  | 1  | 64   | 49   | 3.96023E+01 | 2.95755E+01 | 6.75732E+00 | 4.0655  | -4.9061 | 8.4014  | 8.000  | 8.000  | 20669 9  | -- --  | 12 4 3 2 2 1 0 2 3 3 3 0 1 112  |
| 10 | 156553.50 | 7.31  | 1  | 64   | 45   | 3.98960E+01 | 3.11980E+01 | 5.31246E+00 | 3.6423  | -7.1541 | 6.8889  | 8.000  | 8.000  | 20669 10 | -- --  | 9 3 2 3 3 2 2 0 0 2 4 2 3 010   |
| 11 | 260957.50 | 7.31  | 1  | 64   | 47   | 3.99851E+01 | 2.99784E+01 | 3.22555E+00 | 2.9934  | -7.0741 | 7.1221  | 8.000  | 8.000  | 20669 11 | -- --  | 9 3 1 6 2 1 1 2 0 1 6 3 1 110   |
| 12 | 313156.00 | 7.31  | 1  | 64   | 43   | 4.01789E+01 | 3.05942E+01 | 2.91273E+00 | 3.0160  | -5.3619 | 7.5802  | 8.000  | 8.000  | 20669 12 | -- --  | 7 3 1 4 2 1 2 1 3 4 4 1 0 19    |
| 13 | 417560.00 | 7.31  | 1  | 64   | 44   | 3.97907E+01 | 3.08185E+01 | 2.00658E+00 | 2.5890  | -3.5230 | 5.5160  | 8.000  | 8.000  | 20669 14 | -- --  | 6 2 3 0 3 3 0 5 3 4 4 2 1 2 6   |
| 14 | 521960.00 | 7.31  | 1  | 64   | 46   | 4.04407E+01 | 3.03098E+01 | 1.22310E+00 | 2.6819  | -1.5758 | 6.9071  | 8.000  | 8.000  | 20669 16 | -- --  | 7 3 2 0 1 2 1 3 4 6 1 4 3 3 6   |
| 15 | 626359.00 | 7.31  | 1  | 64   | 40   | 4.04699E+01 | 3.12473E+01 | 8.53881E-01 | 2.6686  | 1.7165  | 6.5086  | 8.000  | 8.000  | 20669 17 | -- --  | 5 4 3 1 1 2 1 4 3 3 3 2 4 0 4   |
| 16 | 730756.50 | 7.31  | 1  | 64   | 35   | 4.07326E+01 | 3.33633E+01 | 6.08846E-01 | 2.2725  | 1.5086  | 7.5527  | 8.000  | 8.000  | 20669 18 | -- --  | 5 1 2 2 1 2 1 0 4 4 3 2 1 2 5   |

Table 10: Applied phase offsets and  $10^6 \times \chi^2$  of aux. parameters ( $B_x, B_y, \dots$  And  $\Delta$  = difference ref-sample in  $10^{-3}$  units (B:milliGauss).

| nt  | $\Delta J/\mu Tm$       | $\approx \Delta\Phi$ | Bx        | By        | Bz       | B2x       | B2y       | B2z       | B1x       | B1y       | B1z |
|-----|-------------------------|----------------------|-----------|-----------|----------|-----------|-----------|-----------|-----------|-----------|-----|
| 1   | -0.201                  | -4.2601 <sup>o</sup> | 0.3Δ -0.6 | 0.0Δ -0.3 | 0.0Δ 0.5 | 0.0Δ 0.0  | 0.0Δ 0.2  | 0.0Δ -0.2 | 0.0Δ -0.0 | 0.0Δ -0.0 | 0.1 |
| 2   | -0.092                  | -1.9459 <sup>o</sup> | 0.1Δ -0.4 | 0.0Δ -0.3 | 0.0Δ 0.6 | 0.0Δ 0.1  | 0.0Δ 0.0  | 0.0Δ -0.1 | 0.0Δ -0.0 | 0.0Δ 0.0  | 0.0 |
| 3   | -0.388                  | -8.2441 <sup>o</sup> | 0.1Δ -0.8 | 0.0Δ 0.4  | 0.0Δ 0.6 | 0.0Δ 0.0  | 0.0Δ 0.3  | 0.1Δ -0.1 | 0.1Δ 0.1  | 0.0Δ -0.0 | 0.0 |
| 4   | -0.053                  | -1.1249 <sup>o</sup> | 0.3Δ -0.2 | 0.0Δ -0.3 | 0.0Δ 0.6 | 0.0Δ 0.2  | 0.1Δ 0.0  | 0.0Δ -0.0 | 0.0Δ 0.0  | 0.0Δ 0.0  | 0.0 |
| 5   | -0.147                  | -3.1293 <sup>o</sup> | 0.4Δ 0.0  | 0.0Δ -0.3 | 0.0Δ 0.6 | 0.1Δ 0.2  | 0.1Δ -0.0 | 0.0Δ -0.2 | 0.0Δ 0.1  | 0.1Δ 0.1  | 0.1 |
| 6   | $-0.213 \times 10^{-2}$ | -0.0453 <sup>o</sup> | 0.5Δ -0.1 | 0.0Δ -0.3 | 0.0Δ 0.6 | 0.0Δ 0.3  | 0.0Δ -0.0 | 0.0Δ -0.0 | 0.0Δ 0.1  | 0.1Δ 0.0  | 0.0 |
| 7   | -0.187                  | -3.9631 <sup>o</sup> | 0.8Δ -0.2 | 0.0Δ -0.3 | 0.0Δ 0.6 | 0.1Δ 0.2  | 0.0Δ -0.1 | 0.0Δ -0.1 | 0.0Δ 0.0  | 0.0Δ 0.0  | 0.1 |
| 8   | -0.290                  | -6.1648 <sup>o</sup> | 0.9Δ -0.8 | 0.0Δ 0.3  | 0.0Δ 0.6 | 0.1Δ -0.2 | 0.0Δ 0.4  | 0.0       | 0.1Δ 0.0  | 0.0Δ 0.0  | 0.0 |
| 9   | $-0.143 \times 10^{-2}$ | -0.0303 <sup>o</sup> | 1.2Δ -0.3 | 0.0Δ -0.3 | 0.0Δ 0.7 | 0.0Δ 0.2  | 0.1Δ 0.1  | 0.0Δ -0.0 | 0.1Δ -0.0 | 0.1Δ -0.0 | 0.0 |
| 10  | 0.071                   | 1.5104 <sup>o</sup>  | 1.0Δ -0.5 | 0.0Δ -0.3 | 0.0Δ 0.6 | 0.0Δ 0.1  | 0.0Δ 0.1  | 0.0Δ -0.2 | 0.0Δ -0.0 | 0.0Δ 0.0  | 0.1 |
| 11  | -0.194                  | -4.1175 <sup>o</sup> | 0.7Δ -0.5 | 0.0Δ -0.3 | 0.0Δ 0.6 | 0.0Δ -0.1 | 0.0Δ 0.2  | 0.0Δ -0.0 | 0.1Δ -0.1 | 0.0Δ -0.0 | 0.0 |
| 12  | -0.012                  | -0.2650 <sup>o</sup> | 0.3Δ -0.7 | 0.0Δ -0.1 | 0.0Δ 0.6 | 0.0Δ -0.0 | 0.0Δ 0.2  | 0.0Δ -0.1 | 0.1Δ -0.0 | 0.0Δ -0.0 | 0.0 |
| 13  | -0.184                  | -3.9079 <sup>o</sup> | 0.3Δ -0.5 | 0.0Δ -0.2 | 0.0Δ 0.5 | 0.0Δ 0.0  | 0.0Δ 0.2  | 0.1Δ -0.1 | 0.0Δ 0.0  | 0.1Δ -0.0 | 0.0 |
| 14  | -0.067                  | -1.4267 <sup>o</sup> | 0.2Δ -0.5 | 0.0Δ -0.2 | 0.0Δ 0.5 | 0.0Δ -0.0 | 0.1Δ 0.3  | 0.0Δ -0.2 | 0.0Δ -0.0 | 0.0Δ 0.0  | 0.1 |
| 15  | 0.016                   | 0.3349 <sup>o</sup>  | 0.0Δ -0.8 | 0.0Δ 0.1  | 0.0Δ 0.6 | 0.1Δ -0.4 | 0.0Δ 0.4  | 0.0Δ -0.0 | 0.1Δ -0.0 | 0.0Δ -0.0 | 0.0 |
| 16  | -0.236                  | -5.0190 <sup>o</sup> | 0.0Δ -0.6 | 0.0Δ 0.1  | 0.0Δ 0.5 | 0.0Δ 0.0  | 0.0Δ 0.3  | 0.1Δ 0.0  | 0.1Δ 0.0  | 0.0Δ 0.0  | 0.1 |
| Ave | -0.1230                 | -2.6124 <sup>o</sup> | -         | -         | -        | -         | -         | -         | -         | -         | -   |
| Var | 0.1220                  | 2.5907 <sup>o</sup>  | -         | -         | -        | -         | -         | -         | -         | -         | -   |

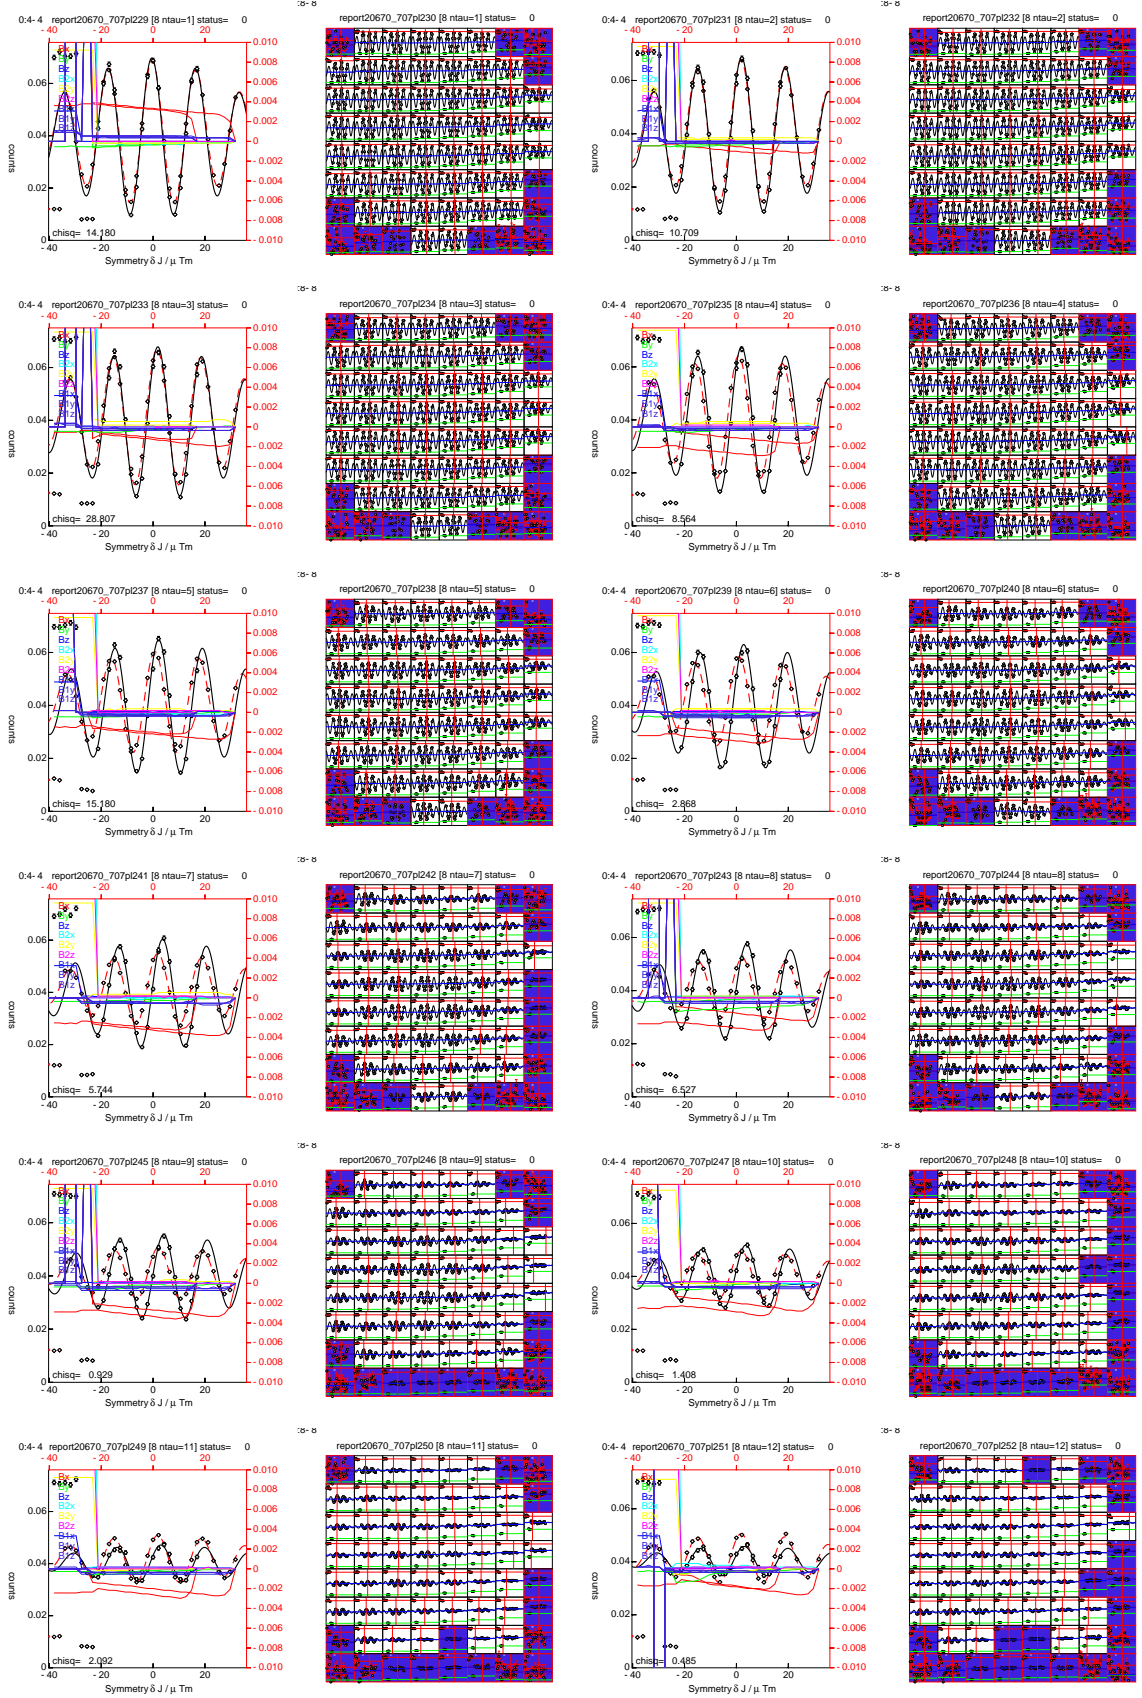

Figure 14: Center phase scan plots. Dashed red line + diamonds: scaled reference.

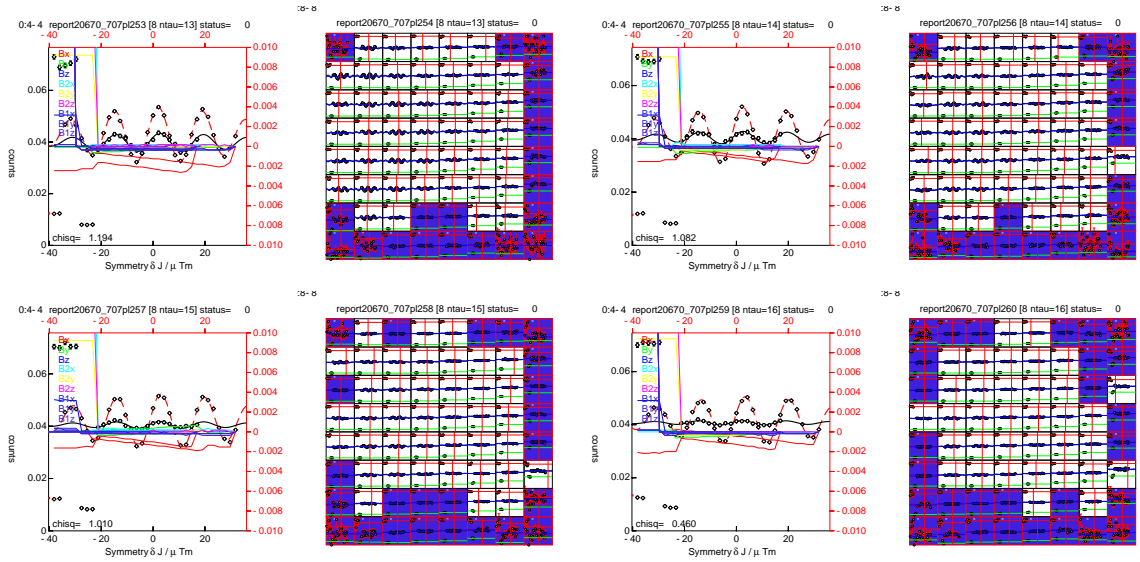

Figure 15: Continuation: Center phase scan plots. Dashed red line + diamonds: scaled reference.

20675

m20675.echo

SDS5wD2O Sun Jun

SDS5wD2O "SDS with N

24 19:04:37 2018

sample 13 pnts

SDS5wD2O "SDS with NaCl in D2O 0.05w in repos, room temp"

SDS5wD2O "SDS with NaCl in D2O 0.05w in repos, room temp"

matching reference: 20676

matching background: -

wavelength  $\lambda = 8.0000 \text{ \AA}$

$Q/\text{\AA}^{-1} = 0.1501$  ( $2\theta = 10.967^\circ$   $\Psi = -84.510^\circ$ )

Up = 19.363 Down= 2.7725

Normalized echo amplitude ( $J_{min}, J_{max}$ )

( $\tau_{min} = 0.0948 \text{ ns} \cdots \tau_{max} = 39.841 \text{ ns}$ ) at detector center: 0.9471 0.0164

| #  | J0/μTm    | theta | nt | npic | nact | average0    | <average>   | <amplitu>   | dj0/μTm | dja/μTm | djv/μTm | lam1/Å | lam2/Å | ref pt   | bgr pt | distribution: dj-count per 1μTm |
|----|-----------|-------|----|------|------|-------------|-------------|-------------|---------|---------|---------|--------|--------|----------|--------|---------------------------------|
| 1  | 994.03    | 10.97 | 1  | 64   | 55   | 1.09562E+01 | 7.66671E+00 | 5.25088E+00 | -0.6361 | 0.3354  | 1.3071  | 8.000  | 8.000  | 20676 1  | ---    | 0 0 0 0 0 9131212 9 0 0 0 0 0   |
| 2  | 2555.51   | 10.97 | 1  | 64   | 55   | 1.09085E+01 | 7.66580E+00 | 5.03753E+00 | 2.3647  | 1.7338  | 0.6463  | 8.000  | 8.000  | 20676 2  | ---    | 0 0 0 0 0 0123013 0 0 0 0 0 0   |
| 3  | 5167.14   | 10.97 | 1  | 64   | 55   | 1.08146E+01 | 7.66202E+00 | 4.59975E+00 | 2.1899  | -0.0940 | 1.3121  | 8.000  | 8.000  | 20676 3  | ---    | 0 0 0 0 0 7151212 9 0 0 0 0 0   |
| 4  | 10387.85  | 10.97 | 1  | 64   | 55   | 1.09156E+01 | 7.69952E+00 | 3.99634E+00 | 2.1950  | -2.0552 | 2.4590  | 8.000  | 8.000  | 20676 4  | ---    | 0 0 1 2 6 910 5 4 8 3 6 1 0     |
| 5  | 20828.60  | 10.97 | 1  | 64   | 54   | 1.09361E+01 | 7.84026E+00 | 3.12318E+00 | 2.1913  | -4.1732 | 3.6974  | 8.000  | 8.000  | 20676 5  | ---    | 2 0 3 3 9 5 7 4 1 5 5 1 3 4 2   |
| 6  | 31268.85  | 10.97 | 1  | 64   | 55   | 1.09794E+01 | 7.71220E+00 | 2.40433E+00 | 3.0070  | -4.7441 | 4.4330  | 8.000  | 8.000  | 20676 6  | ---    | 2 3 2 7 3 7 7 3 0 5 2 4 1 2 7   |
| 7  | 52150.00  | 10.97 | 1  | 64   | 52   | 1.09741E+01 | 8.03749E+00 | 1.59681E+00 | 3.7734  | -5.0374 | 6.2834  | 8.000  | 8.000  | 20676 7  | ---    | 8 4 2 2 5 3 4 0 0 7 2 4 0 2 9   |
| 8  | 73030.30  | 10.97 | 1  | 64   | 55   | 1.10228E+01 | 7.70218E+00 | 1.09171E+00 | 4.3430  | -5.3973 | 6.6503  | 8.000  | 8.000  | 20676 8  | ---    | 10 5 0 4 5 2 3 0 0 4 2 4 1 213  |
| 9  | 104351.50 | 10.97 | 1  | 64   | 53   | 1.09871E+01 | 7.90832E+00 | 6.91168E-01 | 3.8912  | -5.9945 | 8.0578  | 8.000  | 8.000  | 20676 9  | ---    | 14 1 3 3 4 1 2 0 0 4 2 6 0 112  |
| 10 | 156553.50 | 10.97 | 1  | 64   | 49   | 1.11701E+01 | 8.44432E+00 | 3.87476E-01 | 3.7178  | -6.6857 | 7.7692  | 8.000  | 8.000  | 20676 10 | ---    | 13 1 3 3 3 2 1 0 0 5 1 4 1 111  |
| 11 | 260957.50 | 10.97 | 1  | 64   | 44   | 1.10131E+01 | 8.58897E+00 | 1.39264E-01 | 3.6079  | -6.3347 | 6.9156  | 8.000  | 8.000  | 20676 11 | ---    | 7 3 2 5 2 2 0 2 0 3 4 2 2 1 9   |
| 12 | 313156.00 | 10.97 | 1  | 64   | 45   | 1.12247E+01 | 8.54841E+00 | 7.57074E-02 | 3.7602  | -5.1371 | 6.2611  | 8.000  | 8.000  | 20676 12 | ---    | 5 4 2 3 4 3 0 2 2 4 3 3 1 0 9   |
| 13 | 417561.00 | 10.97 | 1  | 64   | 45   | 1.12174E+01 | 8.66767E+00 | 1.40534E-02 | 4.1378  | -2.1317 | 5.7710  | 8.000  | 8.000  | 20676 14 | ---    | 7 1 1 4 2 2 1 4 3 5 3 3 1 1 7   |

Table 11: Applied phase offsets and  $10^6 \times \chi^2$  of aux. parameters ( $B_x, B_y, \dots$  And  $\Delta$  = difference ref-sample in  $10^{-3}$  units (B:milliGauss).

| nt  | $\Delta J / \mu Tm$ | $\approx \Delta \Phi$ | Bx        | By        | Bz        | B2x       | B2y       | B2z       | B1x       | B1y       | B1z |
|-----|---------------------|-----------------------|-----------|-----------|-----------|-----------|-----------|-----------|-----------|-----------|-----|
| 1   | -0.168              | -3.5719 <sup>o</sup>  | 0.1Δ -0.4 | 0.0Δ -0.1 | 0.0Δ -0.1 | 0.0Δ -0.7 | 0.0Δ 1.1  | 0.0Δ -0.1 | 0.0Δ -0.0 | 0.0Δ -0.1 | 0.0 |
| 2   | -0.083              | -1.7545 <sup>o</sup>  | 0.0Δ 0.2  | 0.0Δ -0.2 | 0.0Δ -0.2 | 0.0Δ -0.7 | 0.0Δ 1.1  | 0.0Δ -0.0 | 0.0Δ -0.0 | 0.1Δ -0.0 | 0.0 |
| 3   | -0.272              | -5.7799 <sup>o</sup>  | 0.0Δ 0.4  | 0.0Δ -0.2 | 0.0Δ -0.2 | 0.0Δ -0.9 | 0.1Δ 1.0  | 0.0Δ -0.2 | 0.0Δ 0.0  | 0.1Δ 0.0  | 0.0 |
| 4   | -0.113              | -2.3918 <sup>o</sup>  | 0.1Δ 0.4  | 0.0Δ -0.2 | 0.0Δ 0.1  | 0.0Δ -0.7 | 0.0Δ 0.9  | 0.0Δ 0.1  | 0.0Δ -0.0 | 0.0Δ 0.0  | 0.1 |
| 5   | -0.459              | -9.7438 <sup>o</sup>  | 0.3Δ 0.4  | 0.5Δ -0.5 | 0.0Δ 0.8  | 0.1Δ -0.6 | 0.1Δ 0.8  | 0.0Δ 0.3  | 0.0Δ 0.0  | 0.0Δ 0.1  | 0.0 |
| 6   | -0.162              | -3.4459 <sup>o</sup>  | 0.2Δ 0.5  | 0.0Δ -0.4 | 0.0Δ 0.7  | 0.0Δ -0.7 | 0.0Δ 0.9  | 0.0Δ 0.2  | 0.0Δ 0.1  | 0.0Δ 0.2  | 0.1 |
| 7   | -0.488              | -10.356 <sup>o</sup>  | 0.6Δ 0.6  | 0.0Δ -0.4 | 0.0Δ 0.8  | 0.1Δ -0.3 | 0.0Δ 0.5  | 0.0Δ 0.2  | 0.1Δ 0.1  | 0.0Δ 0.1  | 0.0 |
| 8   | -0.265              | -5.6262 <sup>o</sup>  | 0.4Δ 0.8  | 0.0Δ -0.4 | 0.0Δ 0.7  | 0.1Δ -0.1 | 0.0Δ 0.5  | 0.1Δ 0.1  | 0.0Δ 0.1  | 0.0Δ 0.2  | 0.0 |
| 9   | -0.508              | -10.781 <sup>o</sup>  | 0.4Δ 1.1  | 0.0Δ -0.4 | 0.0Δ 0.7  | 0.1Δ -0.3 | 0.1Δ 0.4  | 0.0       | 0.0Δ 0.2  | 0.0Δ 0.2  | 0.1 |
| 10  | -0.269              | -5.7103 <sup>o</sup>  | 0.4Δ 1.3  | 0.0Δ -0.2 | 0.0Δ 0.7  | 0.0Δ -0.1 | 0.0Δ 0.2  | 0.0Δ -0.0 | 0.0Δ 0.2  | 0.0Δ 0.3  | 0.1 |
| 11  | 0.411               | 8.7248 <sup>o</sup>   | 0.3Δ 1.2  | 0.0Δ 0.0  | 0.0Δ 0.7  | 0.0Δ 0.1  | 0.0Δ 0.0  | 0.0Δ -0.2 | 0.0Δ 0.4  | 0.1Δ 0.3  | 0.0 |
| 12  | 0.666               | 14.134 <sup>o</sup>   | 0.2Δ 1.0  | 0.0Δ 0.0  | 0.0Δ 0.7  | 0.1Δ 0.0  | 0.1Δ 0.1  | 0.0Δ -0.2 | 0.0Δ 0.3  | 0.1Δ 0.3  | 0.1 |
| 13  | 1.001               | 21.249 <sup>o</sup>   | 0.1Δ 0.6  | 0.0Δ -0.3 | 0.0Δ 0.8  | 0.0Δ 0.3  | 0.0Δ -0.2 | 0.0Δ -0.4 | 0.1Δ 0.2  | 0.0Δ 0.1  | 0.0 |
| Ave | -0.0545             | -1.1579 <sup>o</sup>  | -         | -         | -         | -         | -         | -         | -         | -         | -   |
| Var | 0.4448              | 9.4442 <sup>o</sup>   | -         | -         | -         | -         | -         | -         | -         | -         | -   |

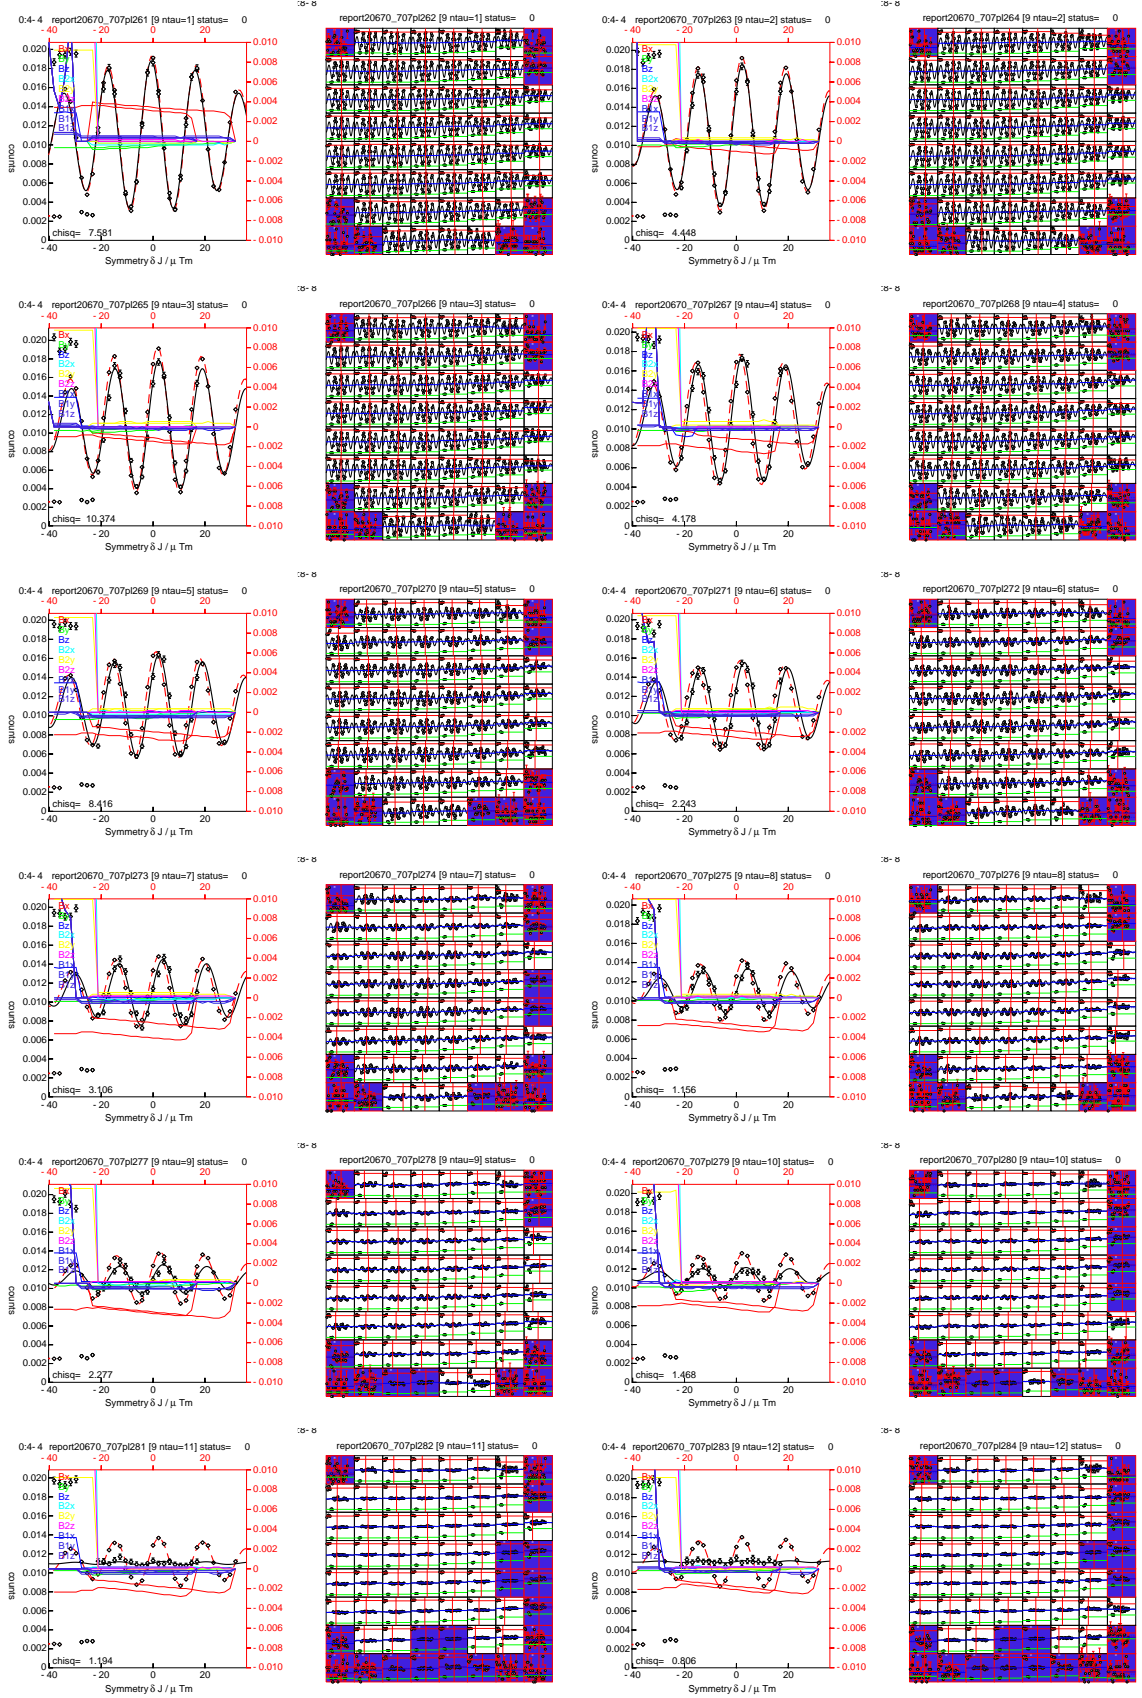

Figure 16: Center phase scan plots. Dashed red line + diamonds: scaled reference.

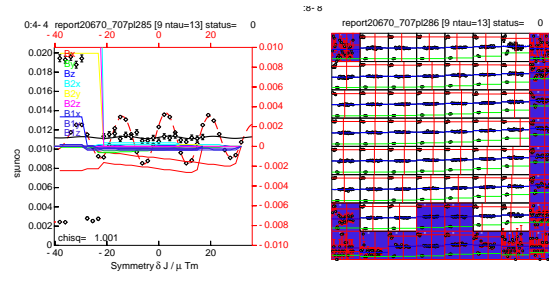

Figure 17: Continuation: Center phase scan plots. Dashed red line + diamonds: scaled reference.

**SDS5wD2O\_”SDS\_with\_NaCl.in\_D2O [ 6, 800]**  
**Without background subtraction**

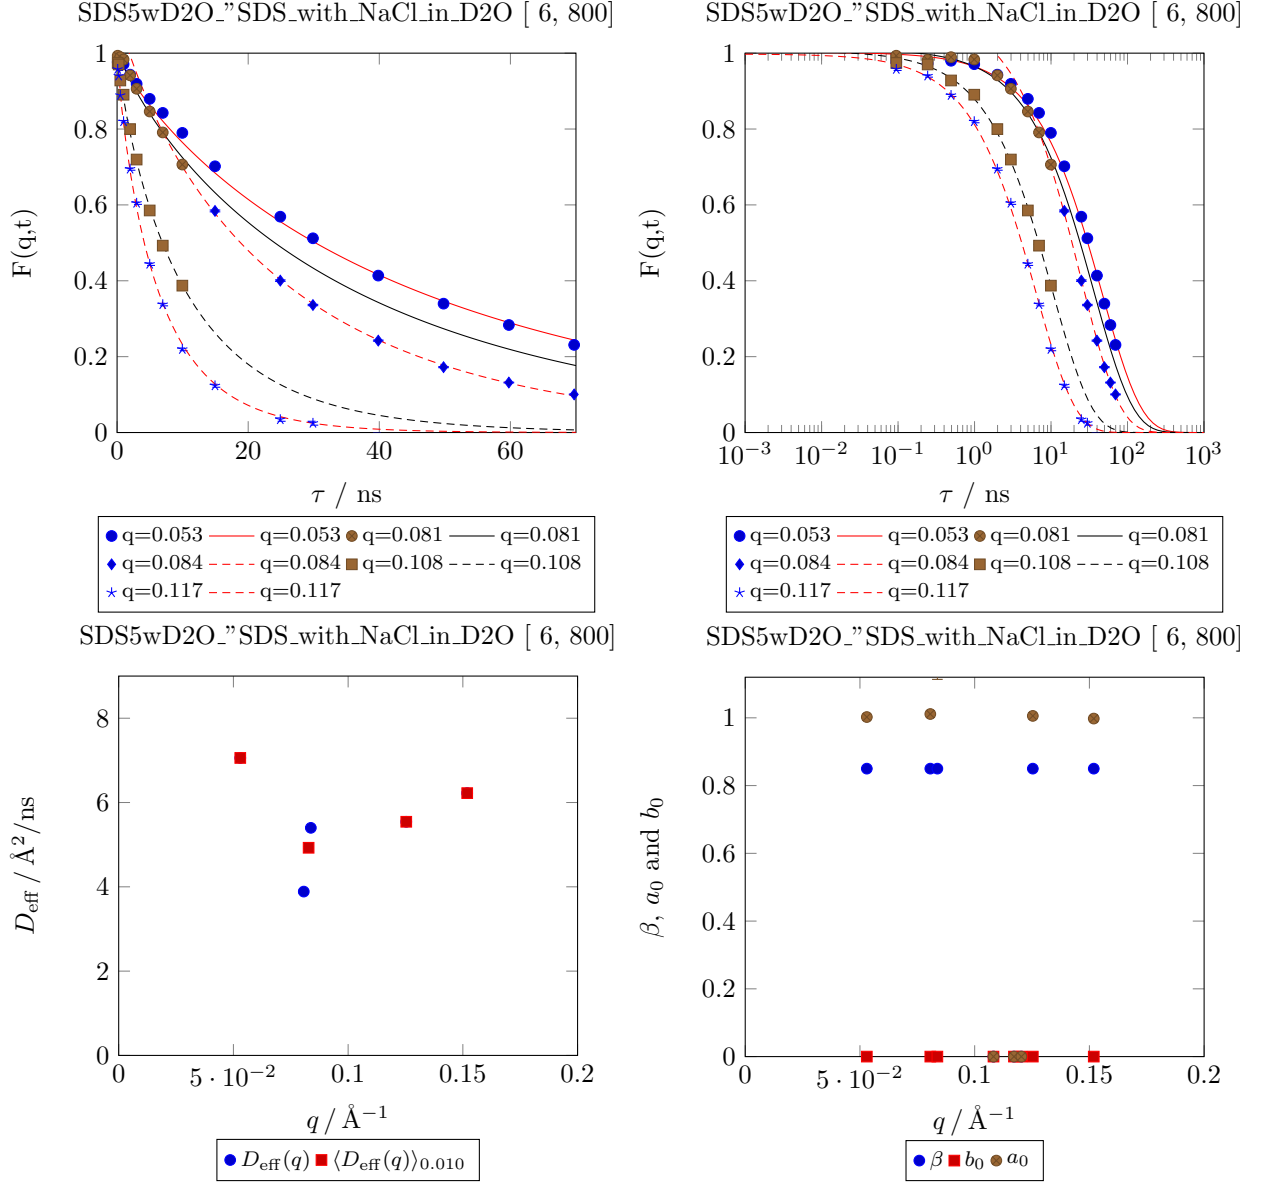

**Fitting model:**

$$F(q,t) = a_0 \left[ \exp\{-(t/\tau)^\beta\} \right] + b_0 \quad (1)$$

**Expression for the effective diffusion constant:**

$$D_{\text{eff}}(q) = \frac{1}{(\tau_0/\beta)\Gamma(1/\beta) q^2} \quad (2)$$

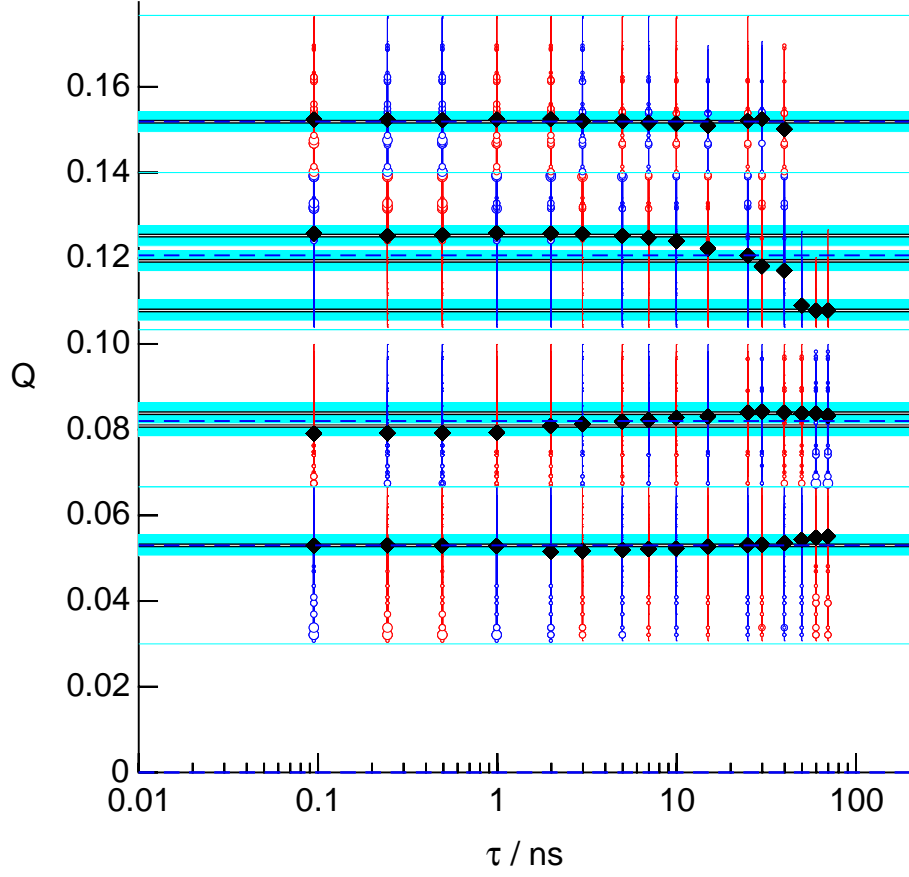

Figure 18: Mapping of single pixel contributions to  $S(q, t)$  points: black diamonds. Dashed lines indicate the average  $q$  values in the  $q$ -binning zones. Size of star rays end symbols (circles) indicate the weight of the contribution from the end symbol  $(q, t)$ . Cyan stripes indicate the catch zone for postcollection used in order to yield curves with consistent  $q$ -labels (controlled by parameter  $r.postcoll\_qcat$ ).

All underlying data of this plot group are preset as ASCII tables in file `report20670_707.tex`. The corresponding sections start with a comment line: `%%+++DRSPINE-PLOT:0: ...`.  
Data in datreat format are copied to: `report20670_707.1.dtr`.

**SDS5wD2O\_”SDS\_with\_NaCl\_in\_D2O [ 8, 800]**  
**Without background subtraction**

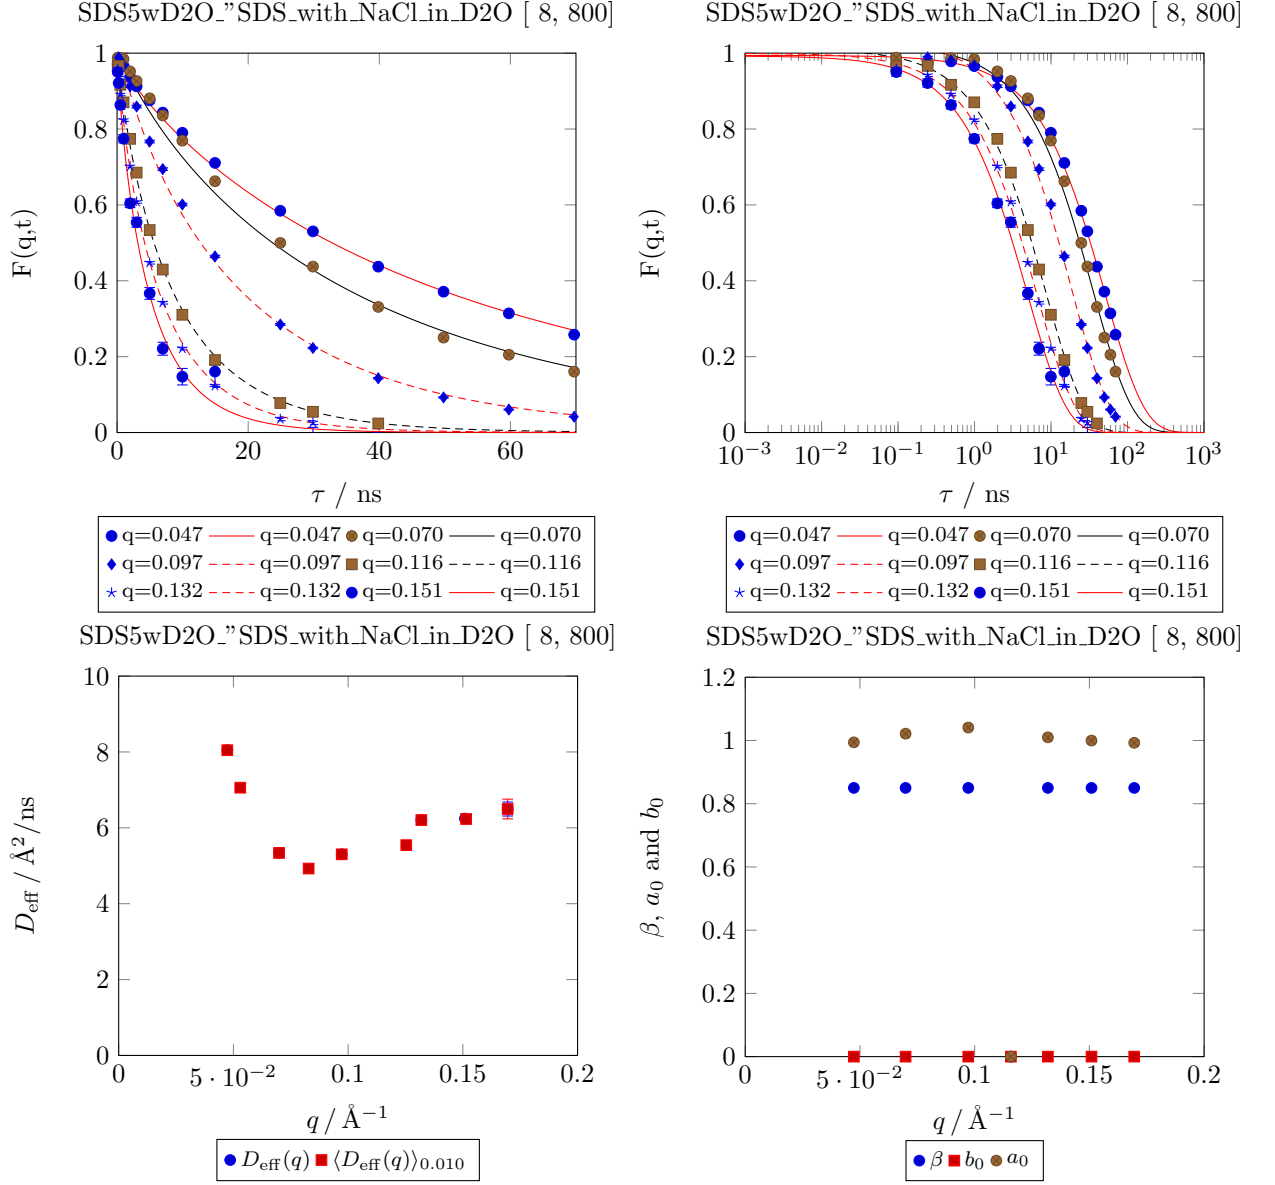

**Fitting model:**

$$F(q, t) = a_0 \left[ \exp\{-(t/\tau)^\beta\} \right] + b_0 \quad (3)$$

**Expression for the effective diffusion constant:**

$$D_{\text{eff}}(q) = \frac{1}{(\tau_0/\beta)\Gamma(1/\beta) q^2} \quad (4)$$

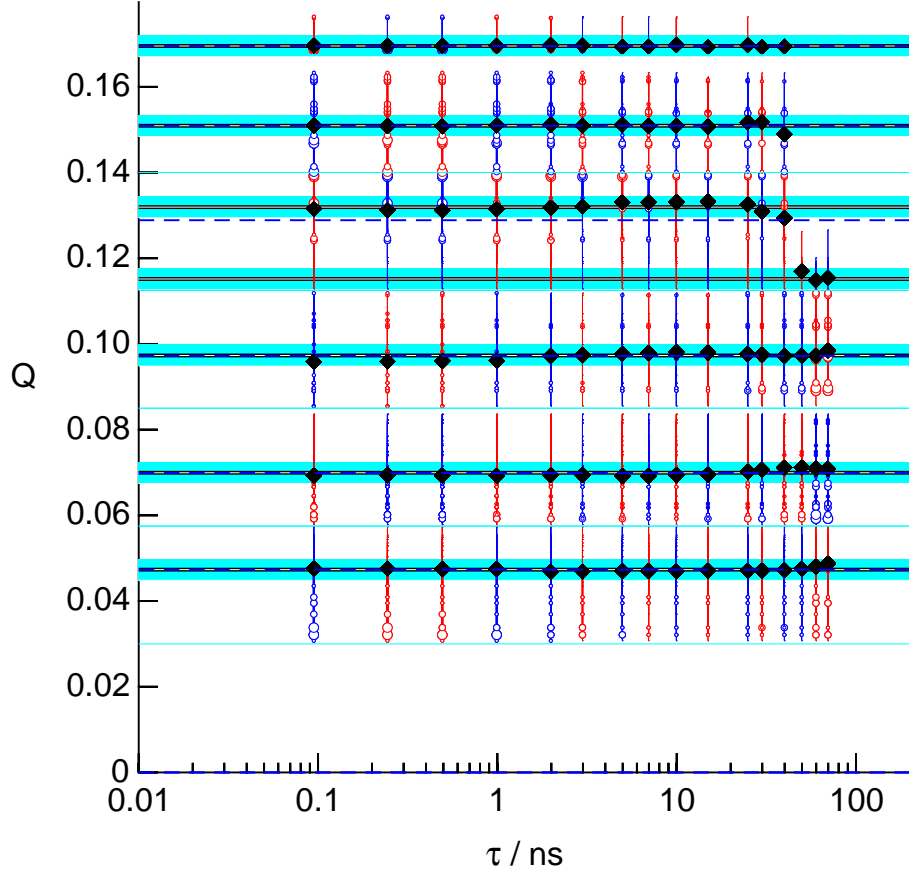

Figure 19: Mapping of single pixel contributions to  $S(q, t)$  points: black diamonds. Dashed lines indicate the average  $q$  values in the  $q$ -binning zones. Size of star rays end symbols (circles) indicate the weight of the contribution from the end symbol  $(q, t)$ . Cyan stripes indicate the catch zone for postcollection used in order to yield curves with consistent  $q$ -labels (controlled by parameter  $r.postcoll\_qcat$ ).

All underlying data of this plot group are preset as ASCII tables in file `report20670_707.tex`. The corresponding sections start with a comment line: `%%+++DRSPINE-PLOT:1: ...`.  
Data in datreat format are copied to: `report20670_707.2.dtr`.

**SDS5wD2O\_”SDS\_with\_NaCl\_in\_D2O [ 10, 800]**  
**Without background subtraction**

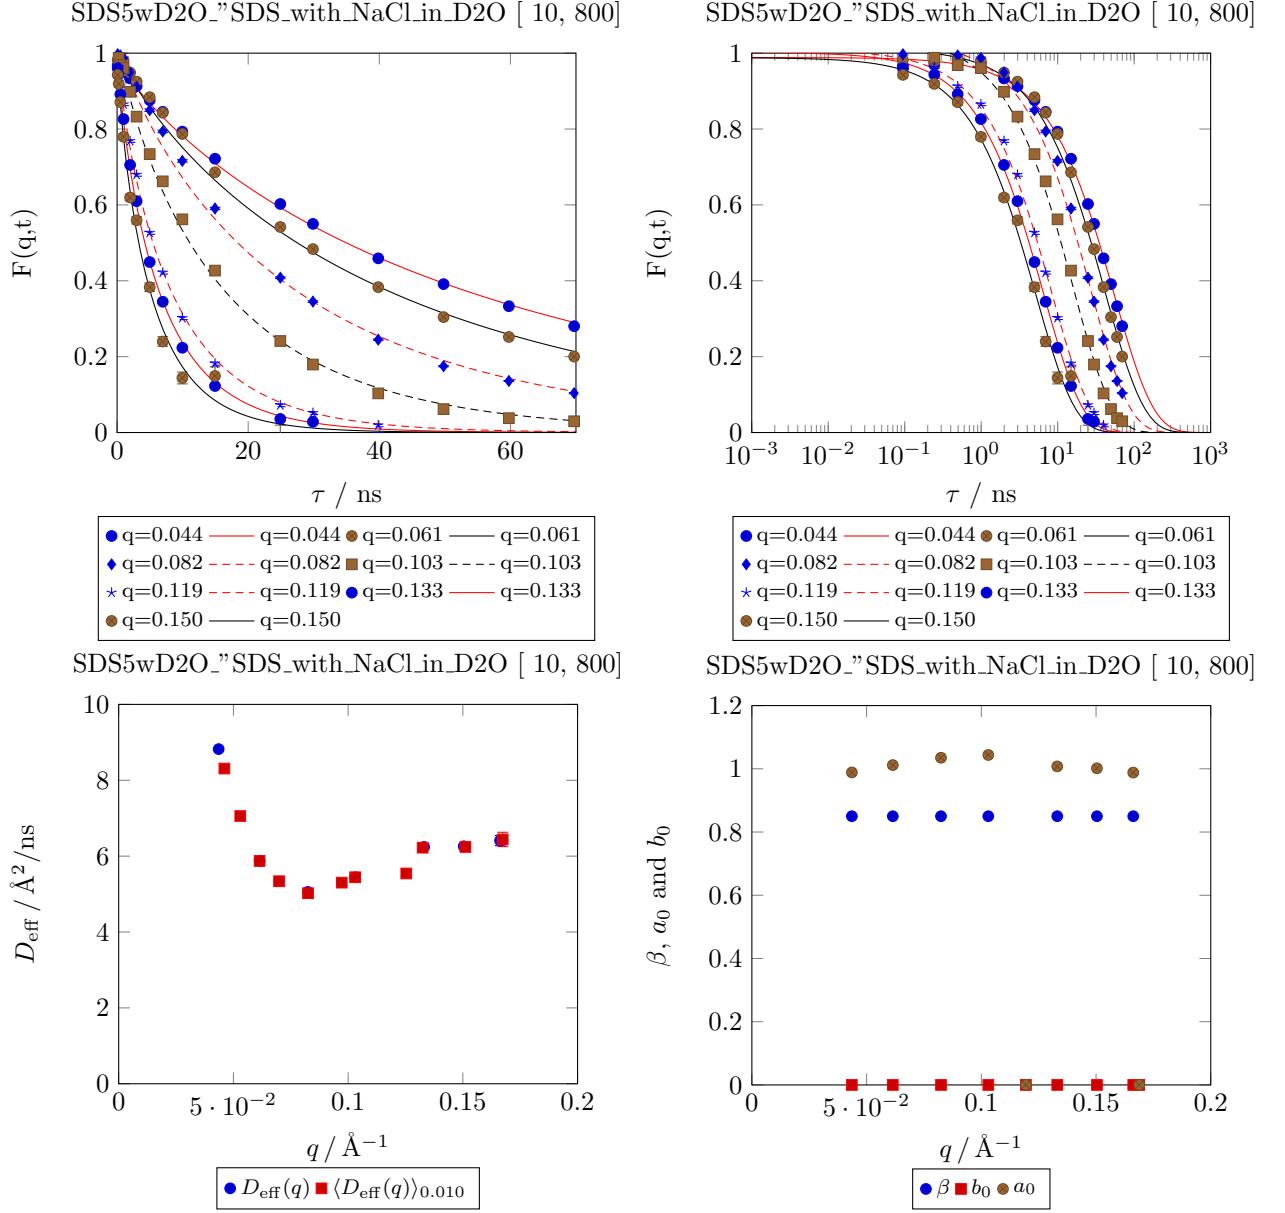

**Fitting model:**

$$F(q, t) = a_0 \left[ \exp\{-(t/\tau)^\beta\} \right] + b_0 \quad (5)$$

**Expression for the effective diffusion constant:**

$$D_{\text{eff}}(q) = \frac{1}{(\tau_0/\beta)\Gamma(1/\beta) q^2} \quad (6)$$

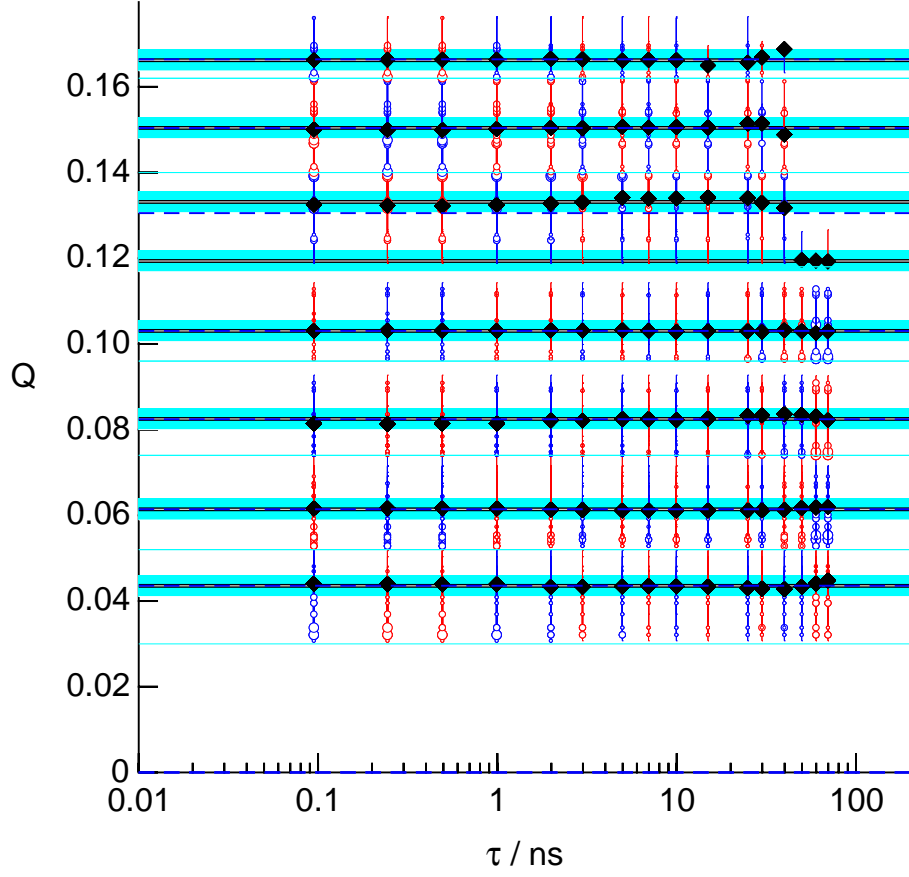

Figure 20: Mapping of single pixel contributions to  $S(q, t)$  points: black diamonds. Dashed lines indicate the average  $q$  values in the  $q$ -binning zones. Size of star rays end symbols (circles) indicate the weight of the contribution from the end symbol  $(q, t)$ . Cyan stripes indicate the catch zone for postcollection used in order to yield curves with consistent  $q$ -labels (controlled by parameter  $r.postcoll\_qcat$ ).

All underlying data of this plot group are preset as ASCII tables in file `report20670_707.tex`. The corresponding sections start with a comment line: `%%+++DRSPINE-PLOT:2: ...`. Data in datreat format are copied to: `report20670_707.3.dtr`.

**SDS5wD2O\_”SDS\_with\_NaCl\_in\_D2O [ 12, 800]**  
**Without background subtraction**

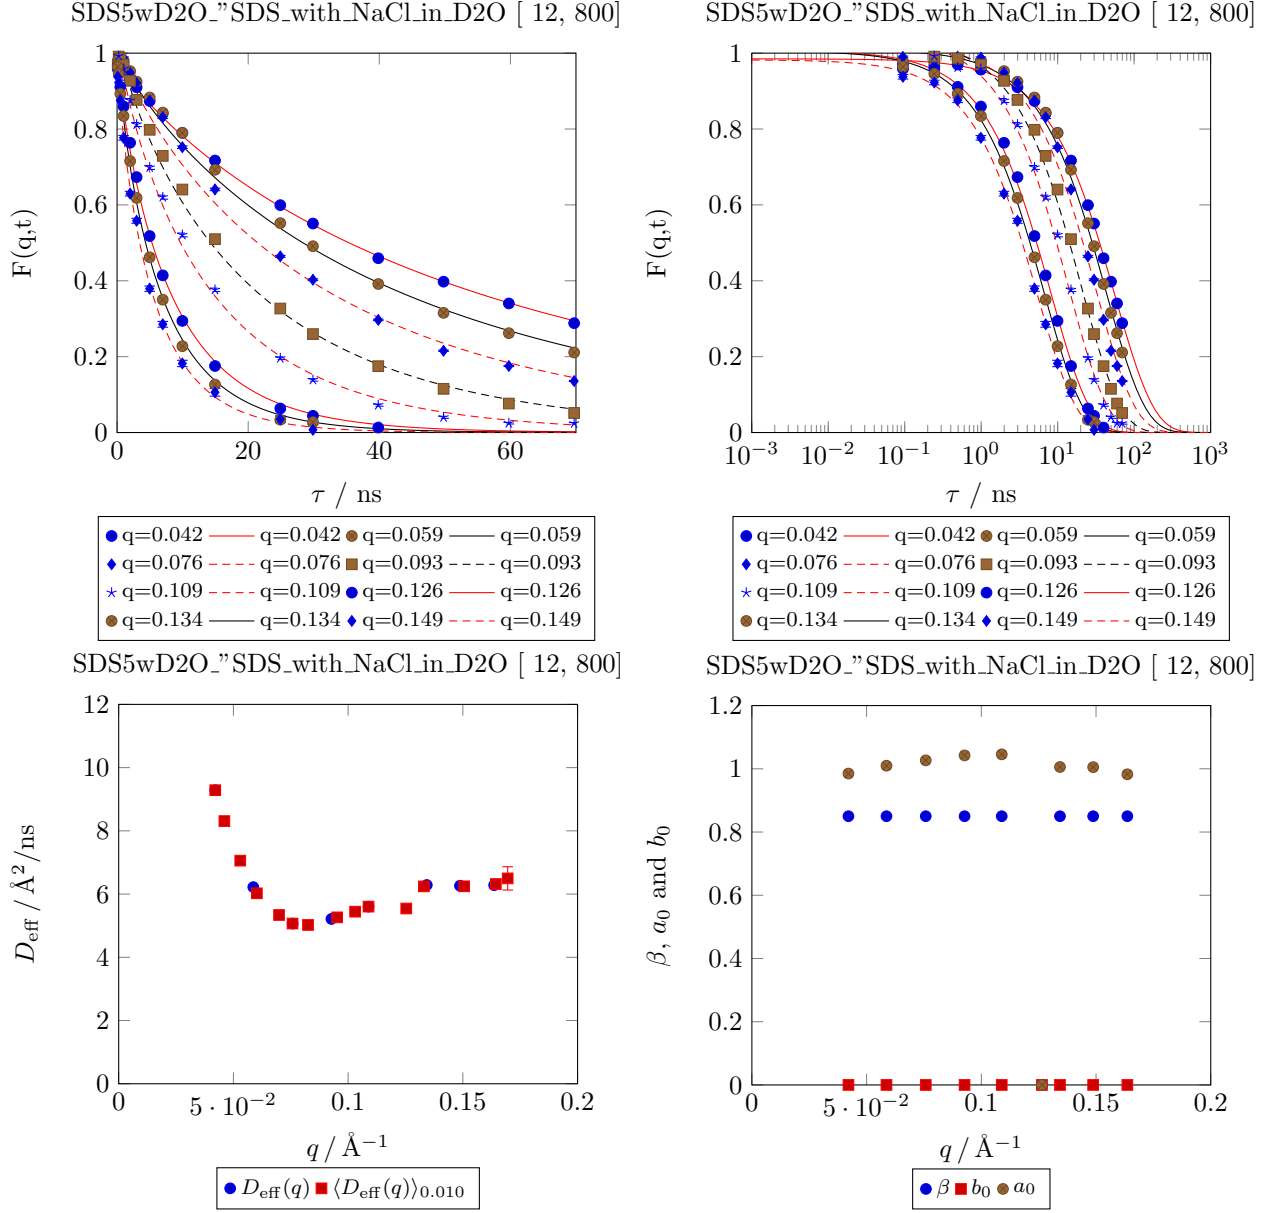

**Fitting model:**

$$F(q, t) = a_0 \left[ \exp\{-(t/\tau)^\beta\} \right] + b_0 \quad (7)$$

**Expression for the effective diffusion constant:**

$$D_{\text{eff}}(q) = \frac{1}{(\tau_0/\beta)\Gamma(1/\beta) q^2} \quad (8)$$

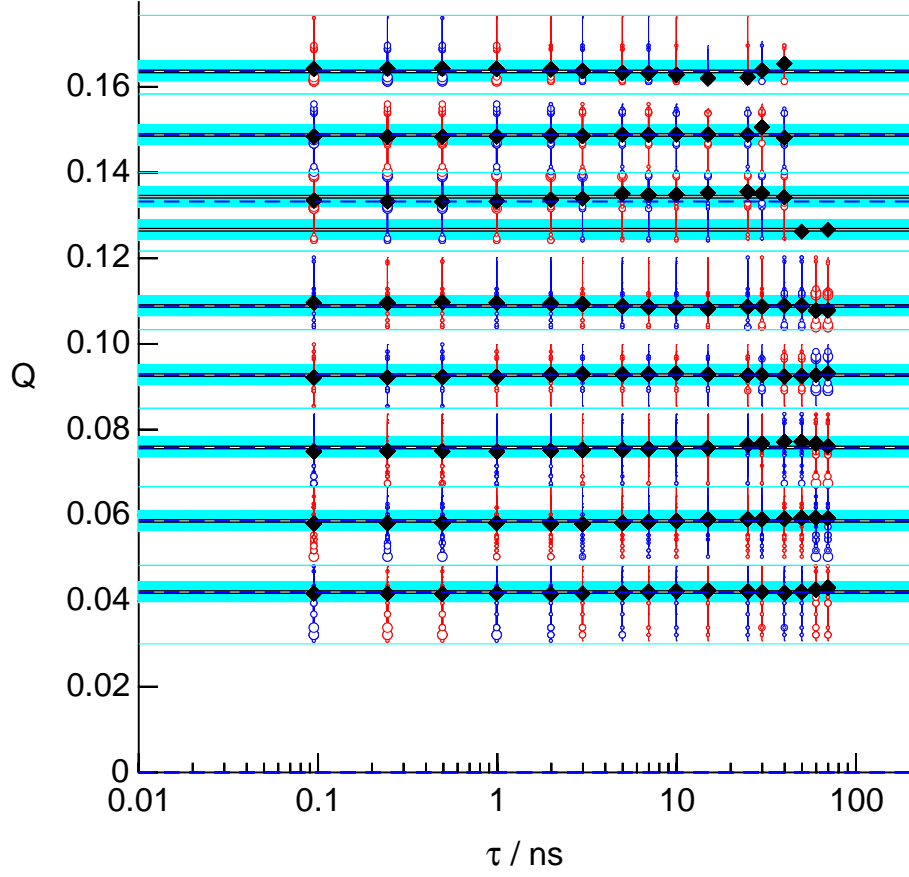

Figure 21: Mapping of single pixel contributions to  $S(q, t)$  points: black diamonds. Dashed lines indicate the average  $q$  values in the  $q$ -binning zones. Size of star rays end symbols (circles) indicate the weight of the contribution from the end symbol  $(q, t)$ . Cyan stripes indicate the catch zone for postcollection used in order to yield curves with consistent  $q$ -labels (controlled by parameter  $r.postcoll\_qcat$ ).

All underlying data of this plot group are preset as ASCII tables in file `report20670_707.tex`. The corresponding sections start with a comment line: `%%+++DRSPINE-PLOT:3: ...`.  
Data in datreat format are copied to: `report20670_707.4.dtr`.

**SDS5wD2O\_”SDS\_with\_NaCl\_in\_D2O [ 14, 800]**  
**Without background subtraction**

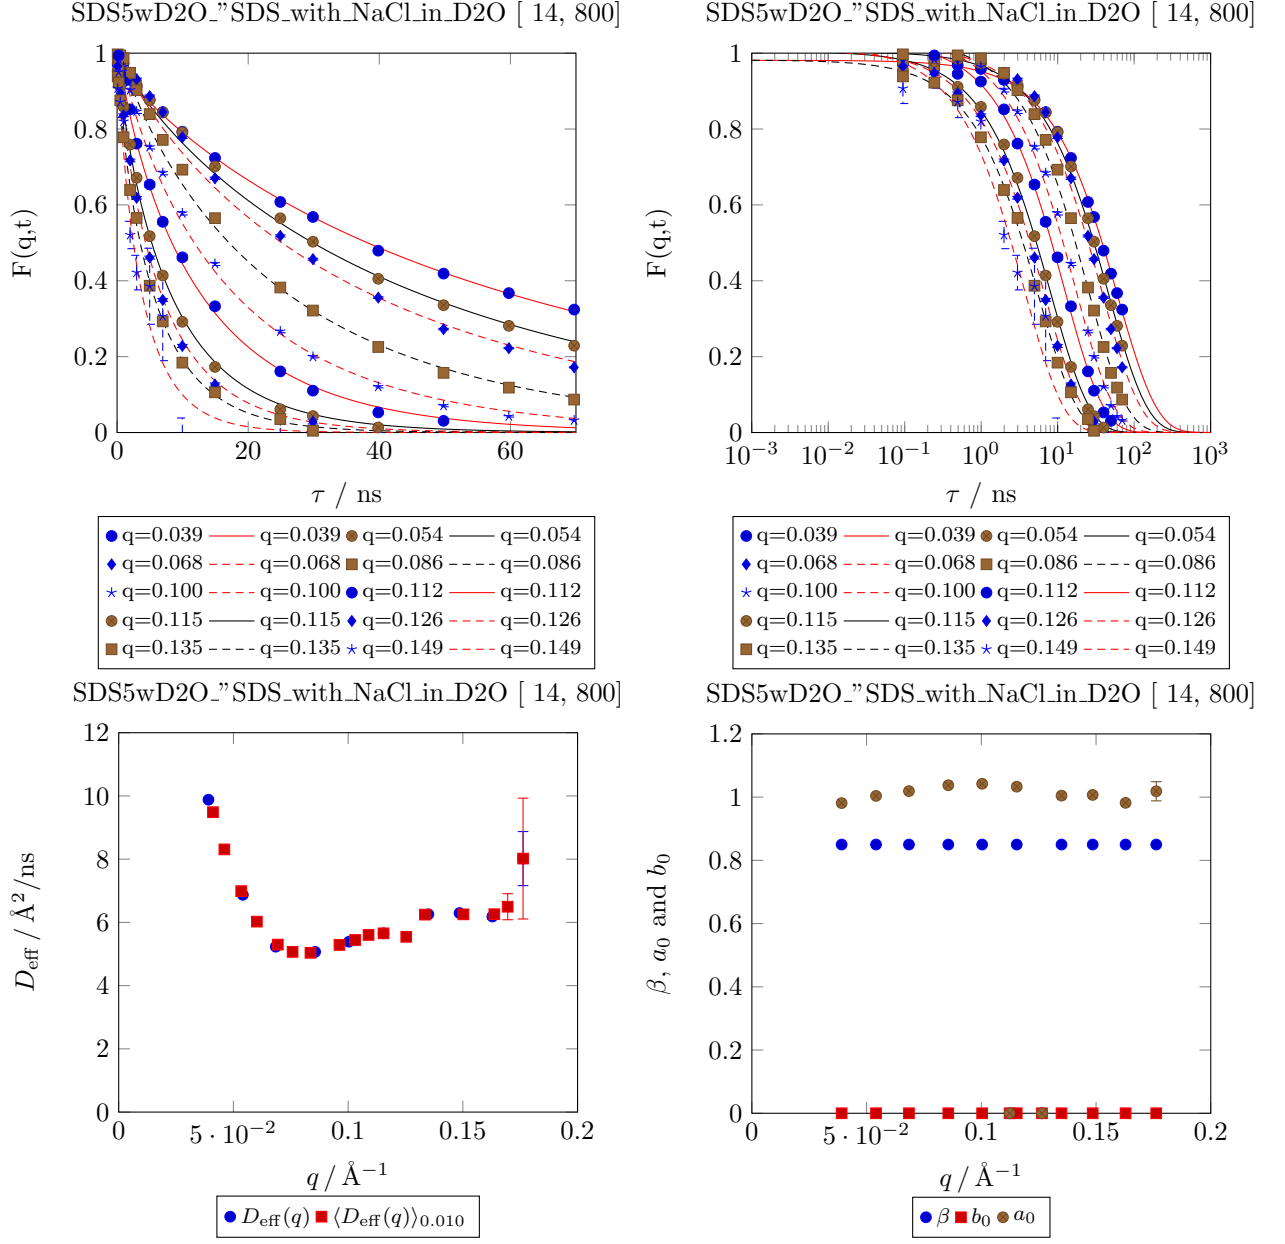

**Fitting model:**

$$F(q, t) = a_0 \left[ \exp\{-(t/\tau)^\beta\} \right] + b_0 \quad (9)$$

**Expression for the effective diffusion constant:**

$$D_{\text{eff}}(q) = \frac{1}{(\tau_0/\beta)\Gamma(1/\beta) q^2} \quad (10)$$

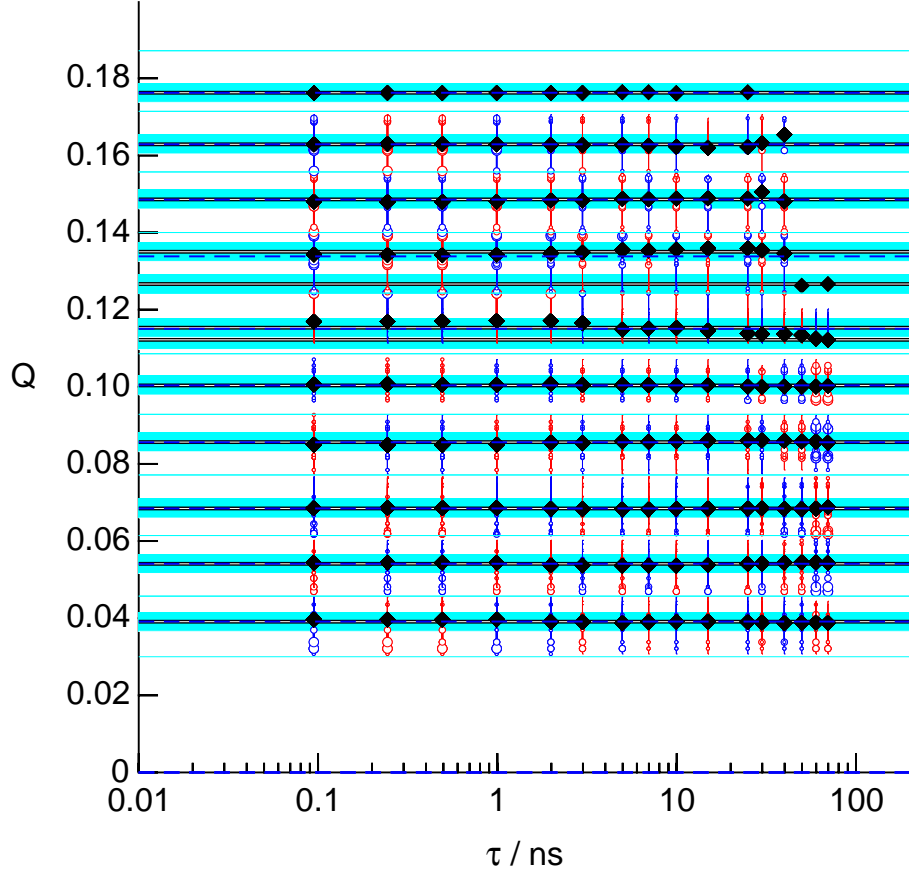

Figure 22: Mapping of single pixel contributions to  $S(q, t)$  points: black diamonds. Dashed lines indicate the average  $q$  values in the  $q$ -binning zones. Size of star rays end symbols (circles) indicate the weight of the contribution from the end symbol  $(q, t)$ . Cyan stripes indicate the catch zone for postcollection used in order to yield curves with consistent  $q$ -labels (controlled by parameter  $r.postcoll\_qcat$ ).

All underlying data of this plot group are preset as ASCII tables in file `report20670_707.tex`. The corresponding sections start with a comment line: `%%+++DRSPINE-PLOT:4: ...`. Data in datreat format are copied to: `report20670_707.5.dtr`.

**SDS5wD2O\_”SDS\_with\_NaCl\_in\_D2O [ 16, 800]**  
**Without background subtraction**

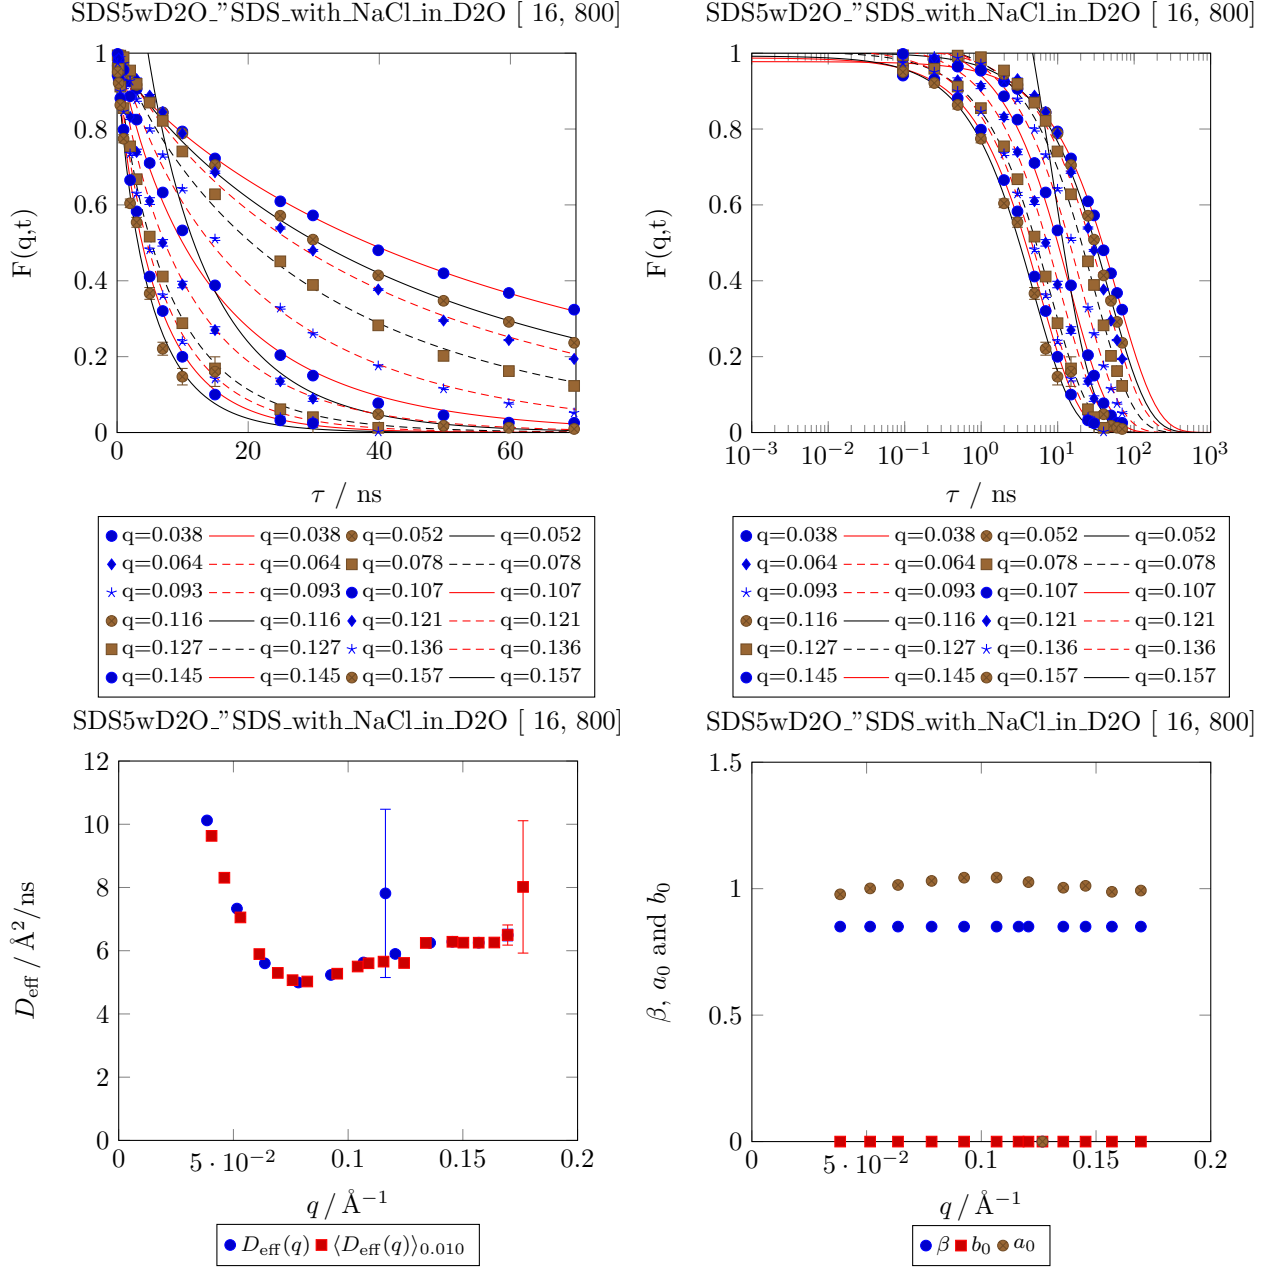

**Fitting model:**

$$F(q, t) = a_0 \left[ \exp\{-(t/\tau)^\beta\} \right] + b_0 \quad (11)$$

**Expression for the effective diffusion constant:**

$$D_{\text{eff}}(q) = \frac{1}{(\tau_0/\beta)\Gamma(1/\beta) q^2} \quad (12)$$

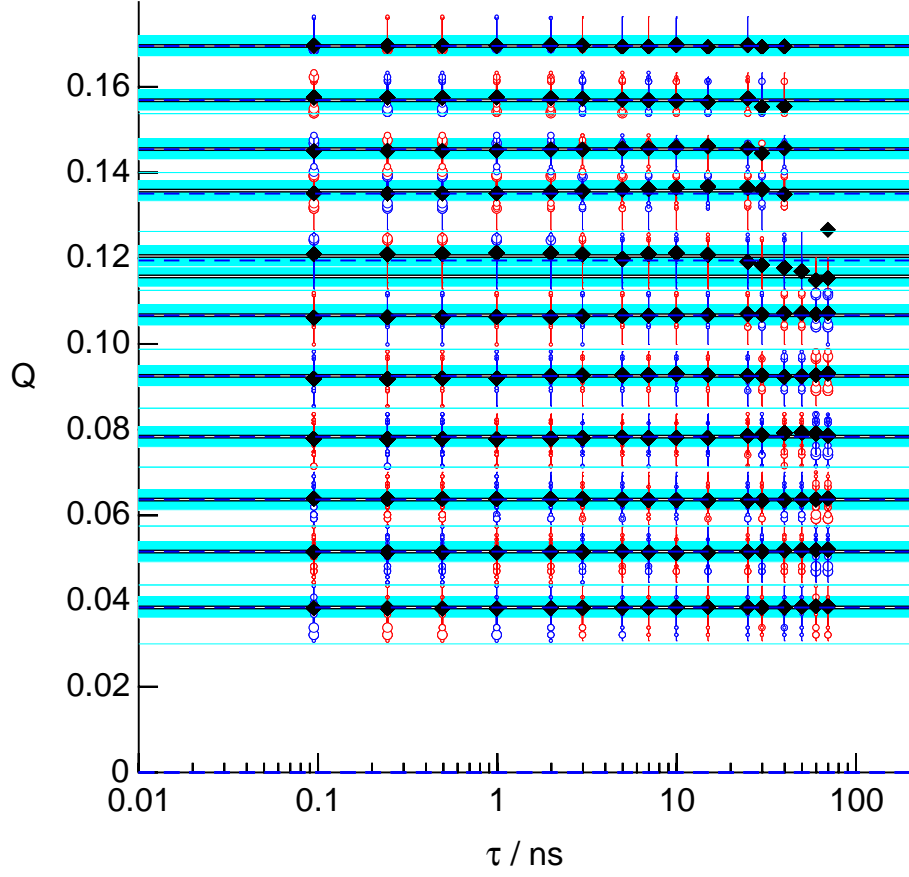

Figure 23: Mapping of single pixel contributions to  $S(q, t)$  points: black diamonds. Dashed lines indicate the average  $q$  values in the  $q$ -binning zones. Size of star rays end symbols (circles) indicate the weight of the contribution from the end symbol  $(q, t)$ . Cyan stripes indicate the catch zone for postcollection used in order to yield curves with consistent  $q$ -labels (controlled by parameter  $r.postcoll\_qcat$ ).

All underlying data of this plot group are preset as ASCII tables in file `report20670_707.tex`. The corresponding sections start with a comment line: `%%+++DRSPINE-PLOT:5: ...`.  
Data in datreat format are copied to: `report20670_707.6.dtr`.

**SDS5wD2O\_”SDS\_with\_NaCl\_in\_D2O [ 18, 800]**  
**Without background subtraction**

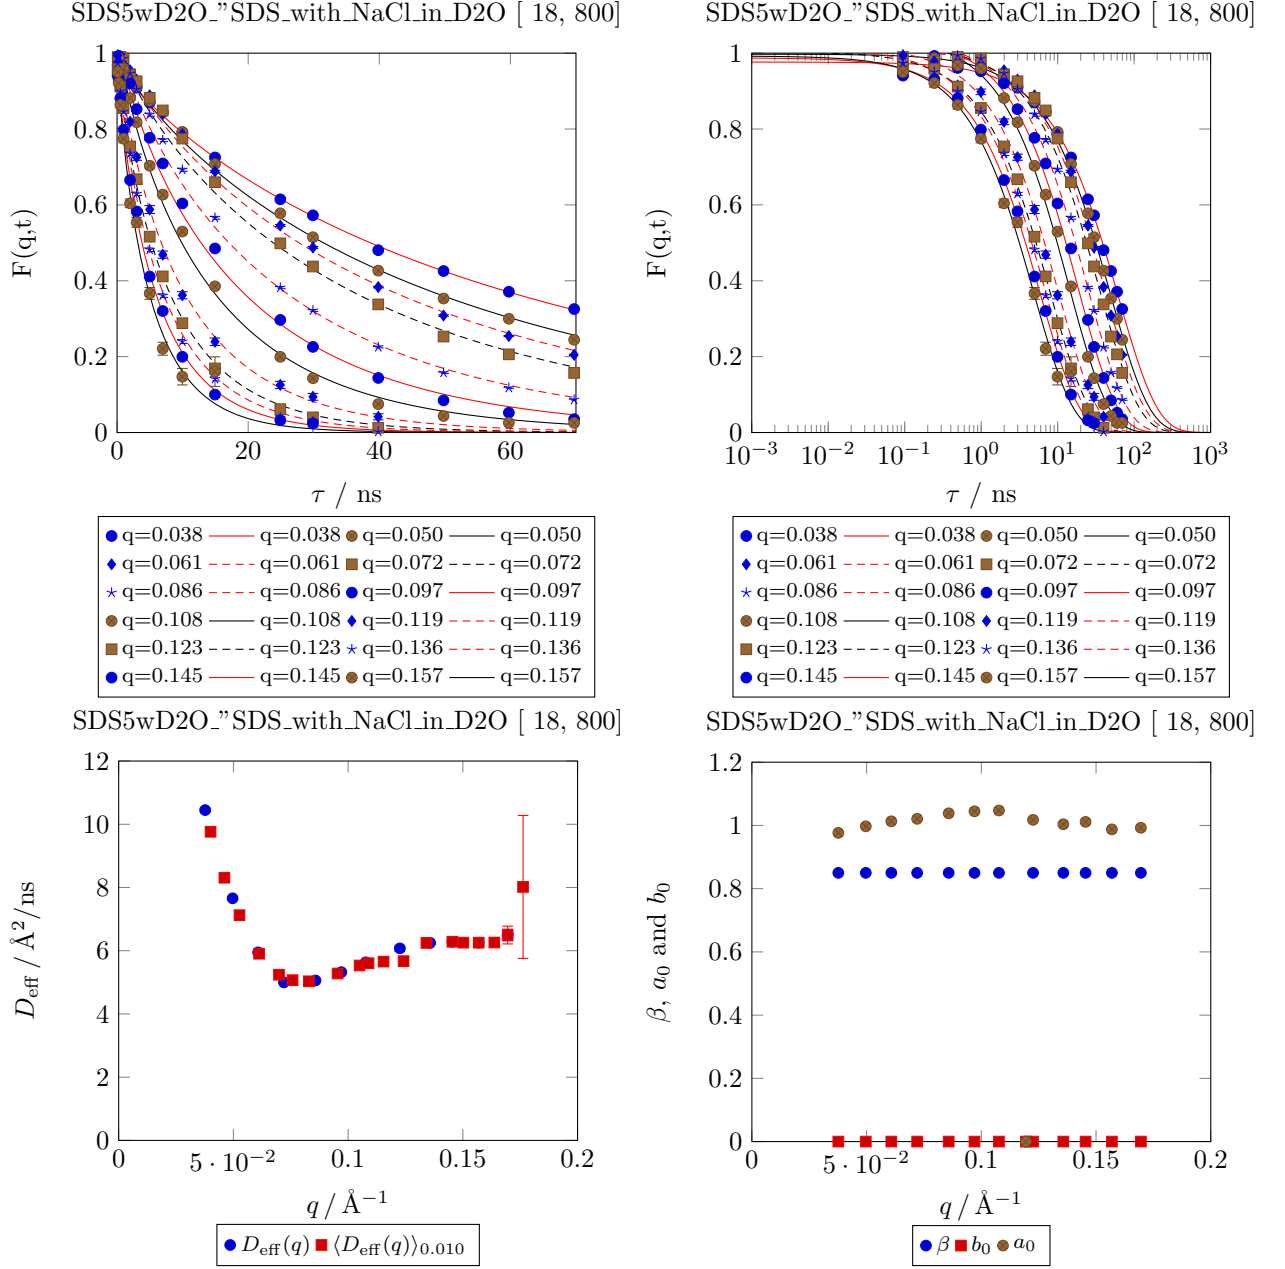

**Fitting model:**

$$F(q, t) = a_0 \left[ \exp\{-(t/\tau)^\beta\} \right] + b_0 \quad (13)$$

**Expression for the effective diffusion constant:**

$$D_{\text{eff}}(q) = \frac{1}{(\tau_0/\beta)\Gamma(1/\beta) q^2} \quad (14)$$

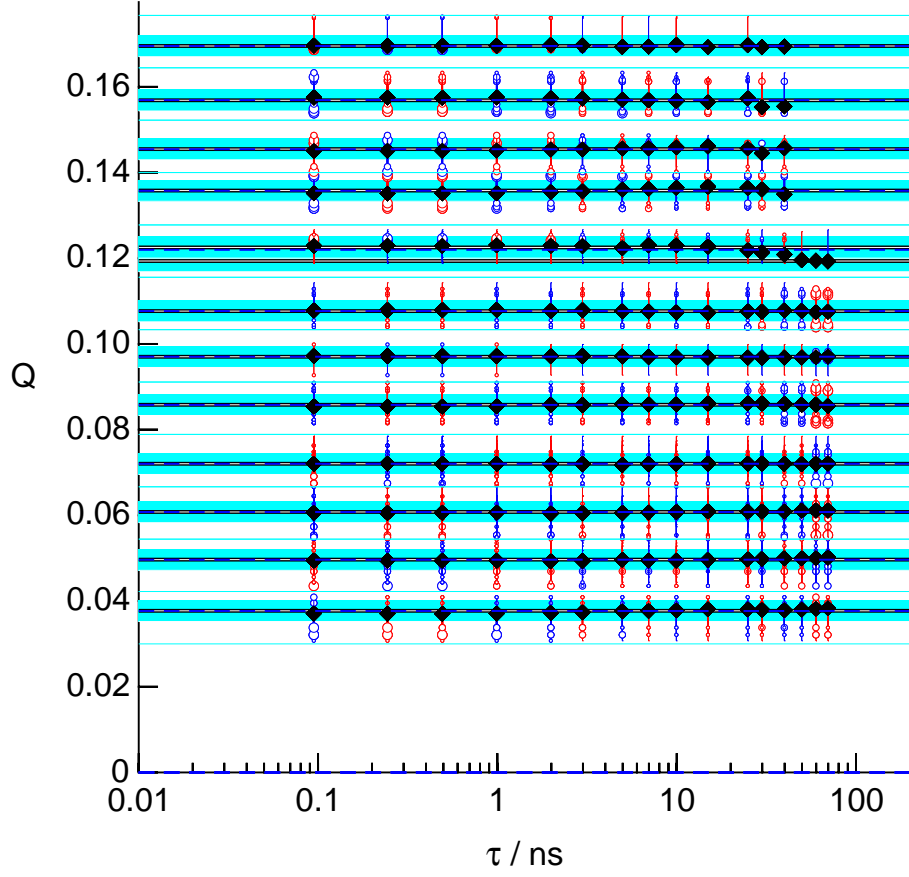

Figure 24: Mapping of single pixel contributions to  $S(q, t)$  points: black diamonds. Dashed lines indicate the average  $q$  values in the  $q$ -binning zones. Size of star rays end symbols (circles) indicate the weight of the contribution from the end symbol  $(q, t)$ . Cyan stripes indicate the catch zone for postcollection used in order to yield curves with consistent  $q$ -labels (controlled by parameter  $r.postcoll\_qcat$ ).

All underlying data of this plot group are preset as ASCII tables in file `report20670_707.tex`. The corresponding sections start with a comment line: `%%+++DRSPINE-PLOT:6: ...`.  
Data in datreat format are copied to: `report20670_707.7.dtr`.

**SDS5wD2O\_”SDS\_with\_NaCl\_in\_D2O [ 20, 800]**  
**Without background subtraction**

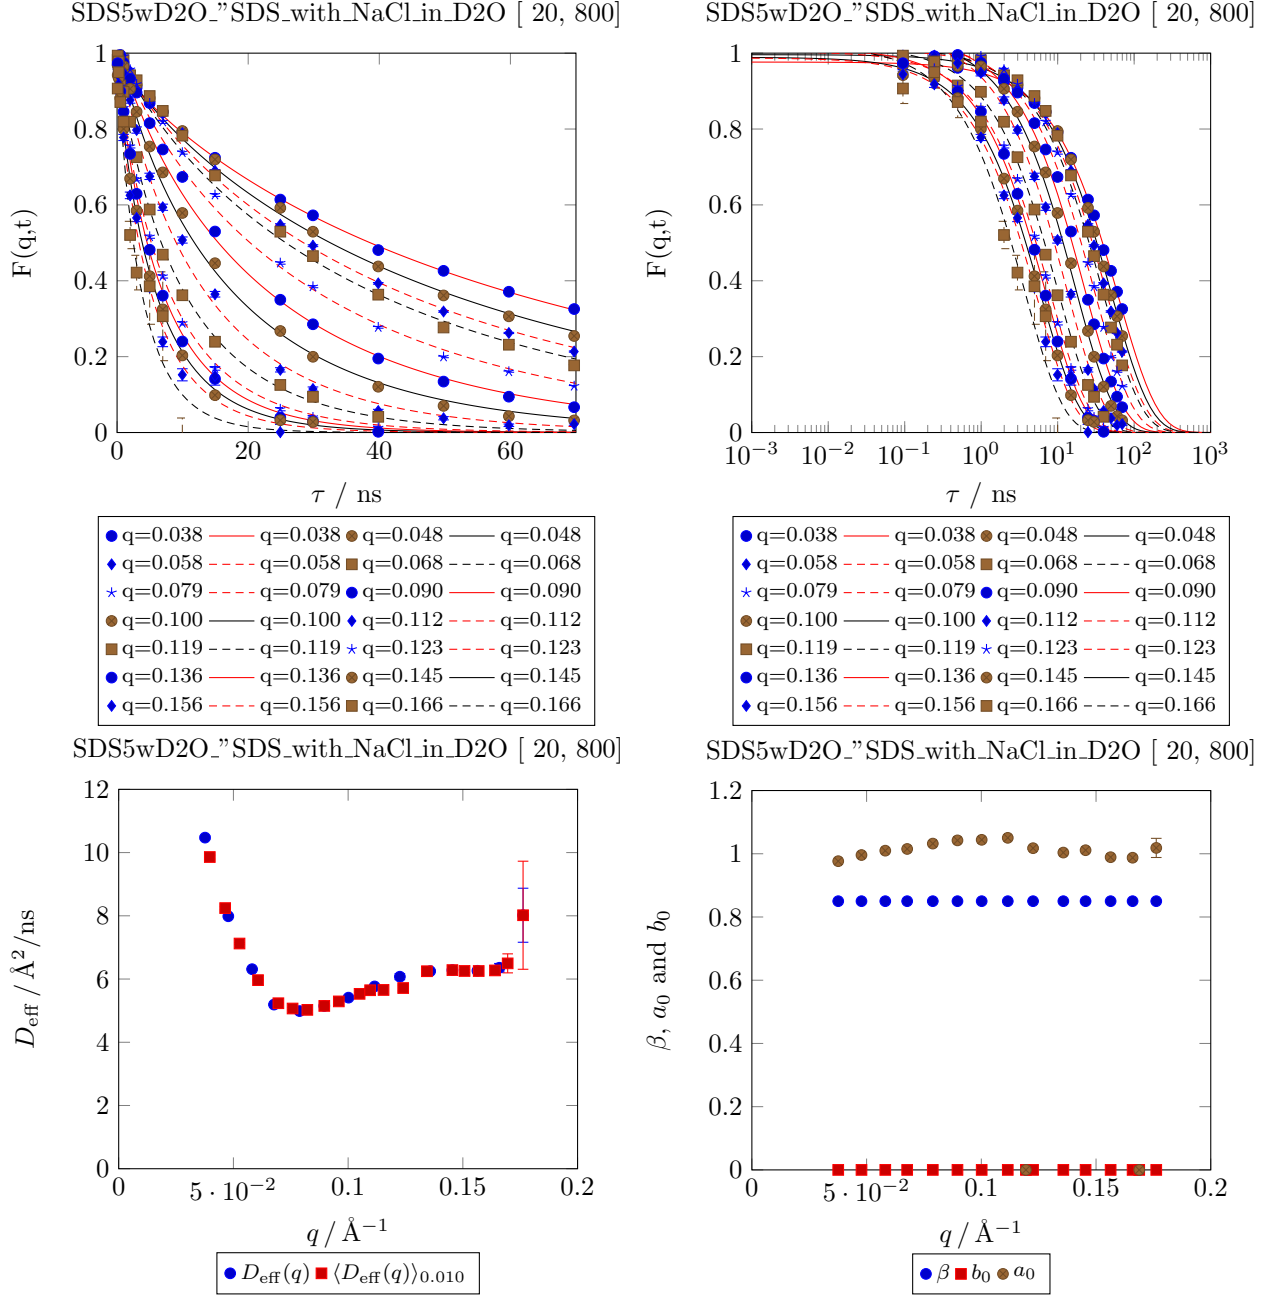

**Fitting model:**

$$F(q, t) = a_0 \left[ \exp\{-(t/\tau)^\beta\} \right] + b_0 \quad (15)$$

**Expression for the effective diffusion constant:**

$$D_{\text{eff}}(q) = \frac{1}{(\tau_0/\beta)\Gamma(1/\beta) q^2} \quad (16)$$

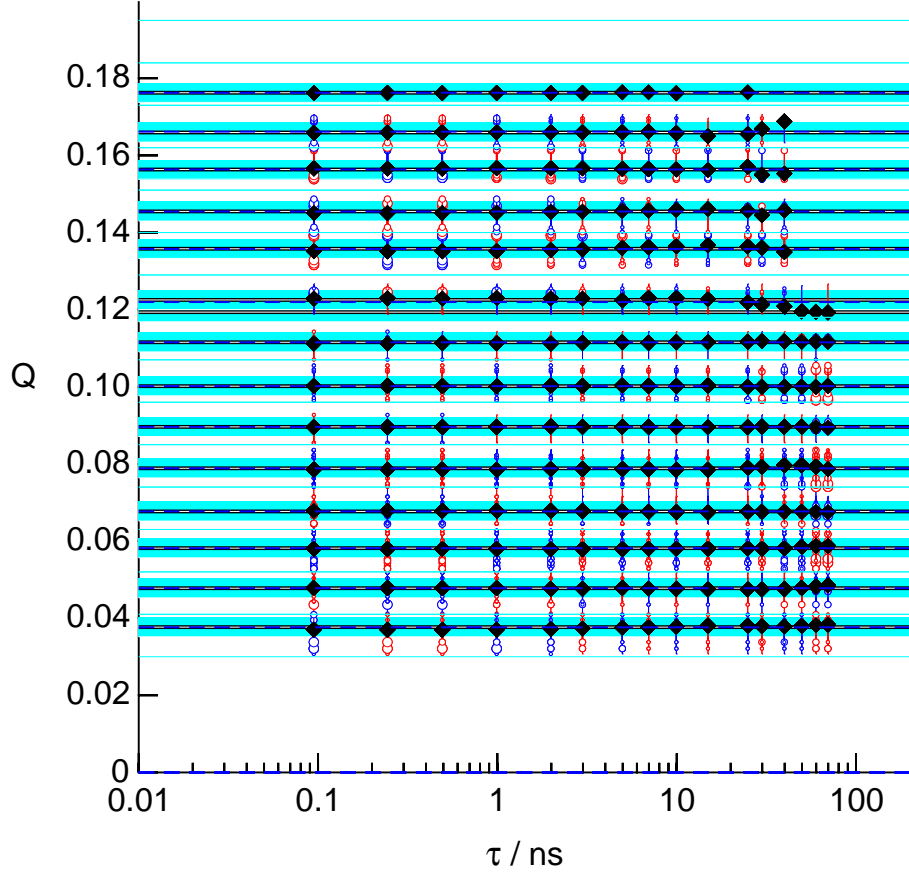

Figure 25: Mapping of single pixel contributions to  $S(q, t)$  points: black diamonds. Dashed lines indicate the average  $q$  values in the  $q$ -binning zones. Size of star rays end symbols (circles) indicate the weight of the contribution from the end symbol  $(q, t)$ . Cyan stripes indicate the catch zone for postcollection used in order to yield curves with consistent  $q$ -labels (controlled by parameter  $r.postcoll\_qcat$ ).

All underlying data of this plot group are preset as ASCII tables in file `report20670_707.tex`. The corresponding sections start with a comment line: `%%+++DRSPINE-PLOT:7: ...`.  
Data in datreat format are copied to: `report20670_707.8.dtr`.

**SDS5wD2O\_”SDS\_with\_NaCl\_in\_D2O [ 22, 800]**  
**Without background subtraction**

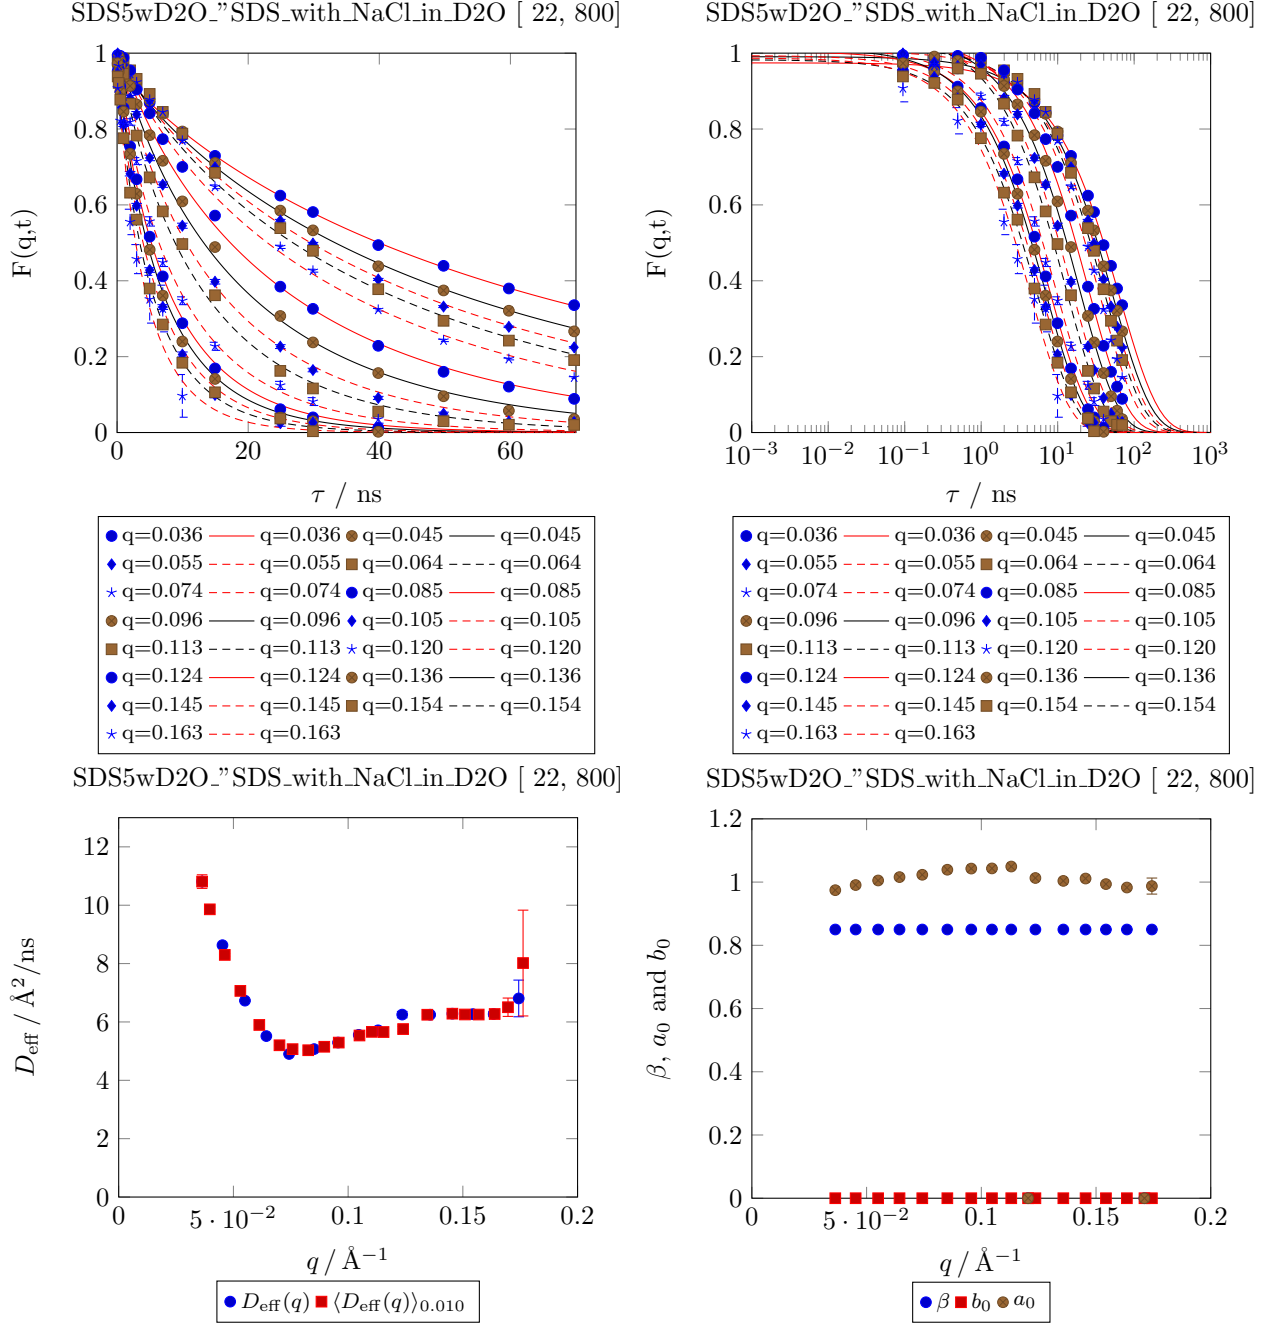

**Fitting model:**

$$F(q, t) = a_0 \left[ \exp\{-(t/\tau)^\beta\} \right] + b_0 \quad (17)$$

**Expression for the effective diffusion constant:**

$$D_{\text{eff}}(q) = \frac{1}{(\tau_0/\beta)\Gamma(1/\beta) q^2} \quad (18)$$

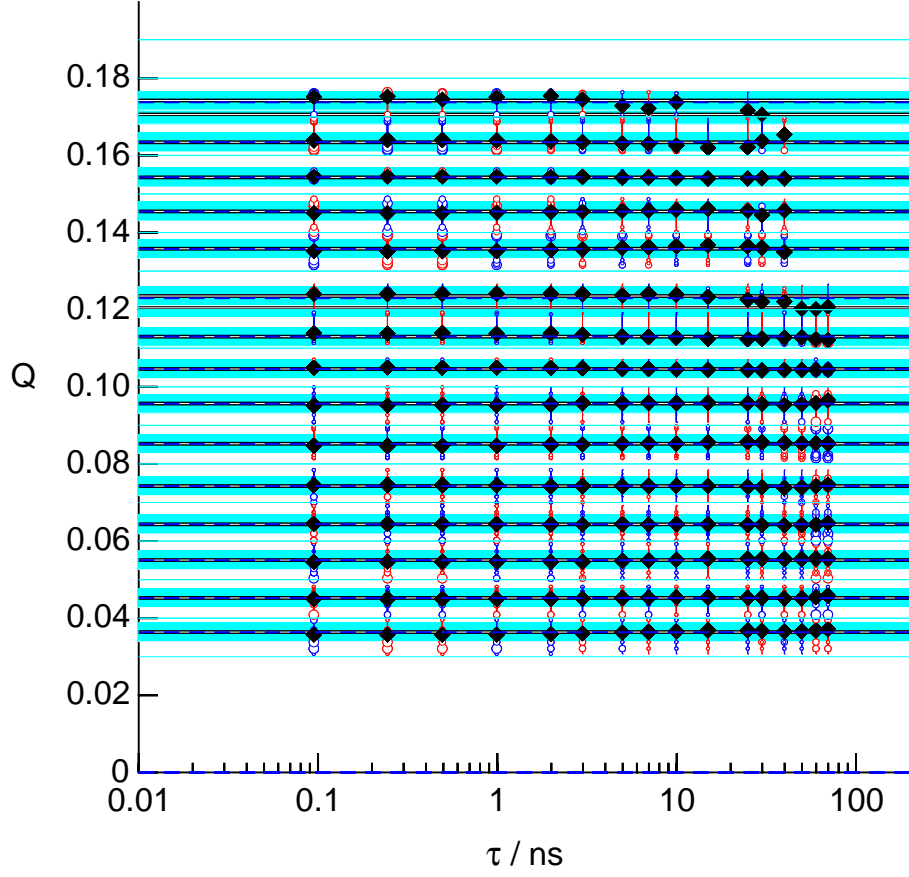

Figure 26: Mapping of single pixel contributions to  $S(q, t)$  points: black diamonds. Dashed lines indicate the average  $q$  values in the  $q$ -binning zones. Size of star rays end symbols (circles) indicate the weight of the contribution from the end symbol  $(q, t)$ . Cyan stripes indicate the catch zone for postcollection used in order to yield curves with consistent  $q$ -labels (controlled by parameter  $r.postcoll\_qcat$ ).

All underlying data of this plot group are preset as ASCII tables in file report20670\_707.tex The corresponding sections start with a comment line: %%+++DRSPINE-PLOT:8: ...  
Data in datreat format are copied to: report20670\_707.9.dtr .

**SDS5wD2O\_”SDS\_with\_NaCl\_in\_D2O [ 24, 800]**  
**Without background subtraction**

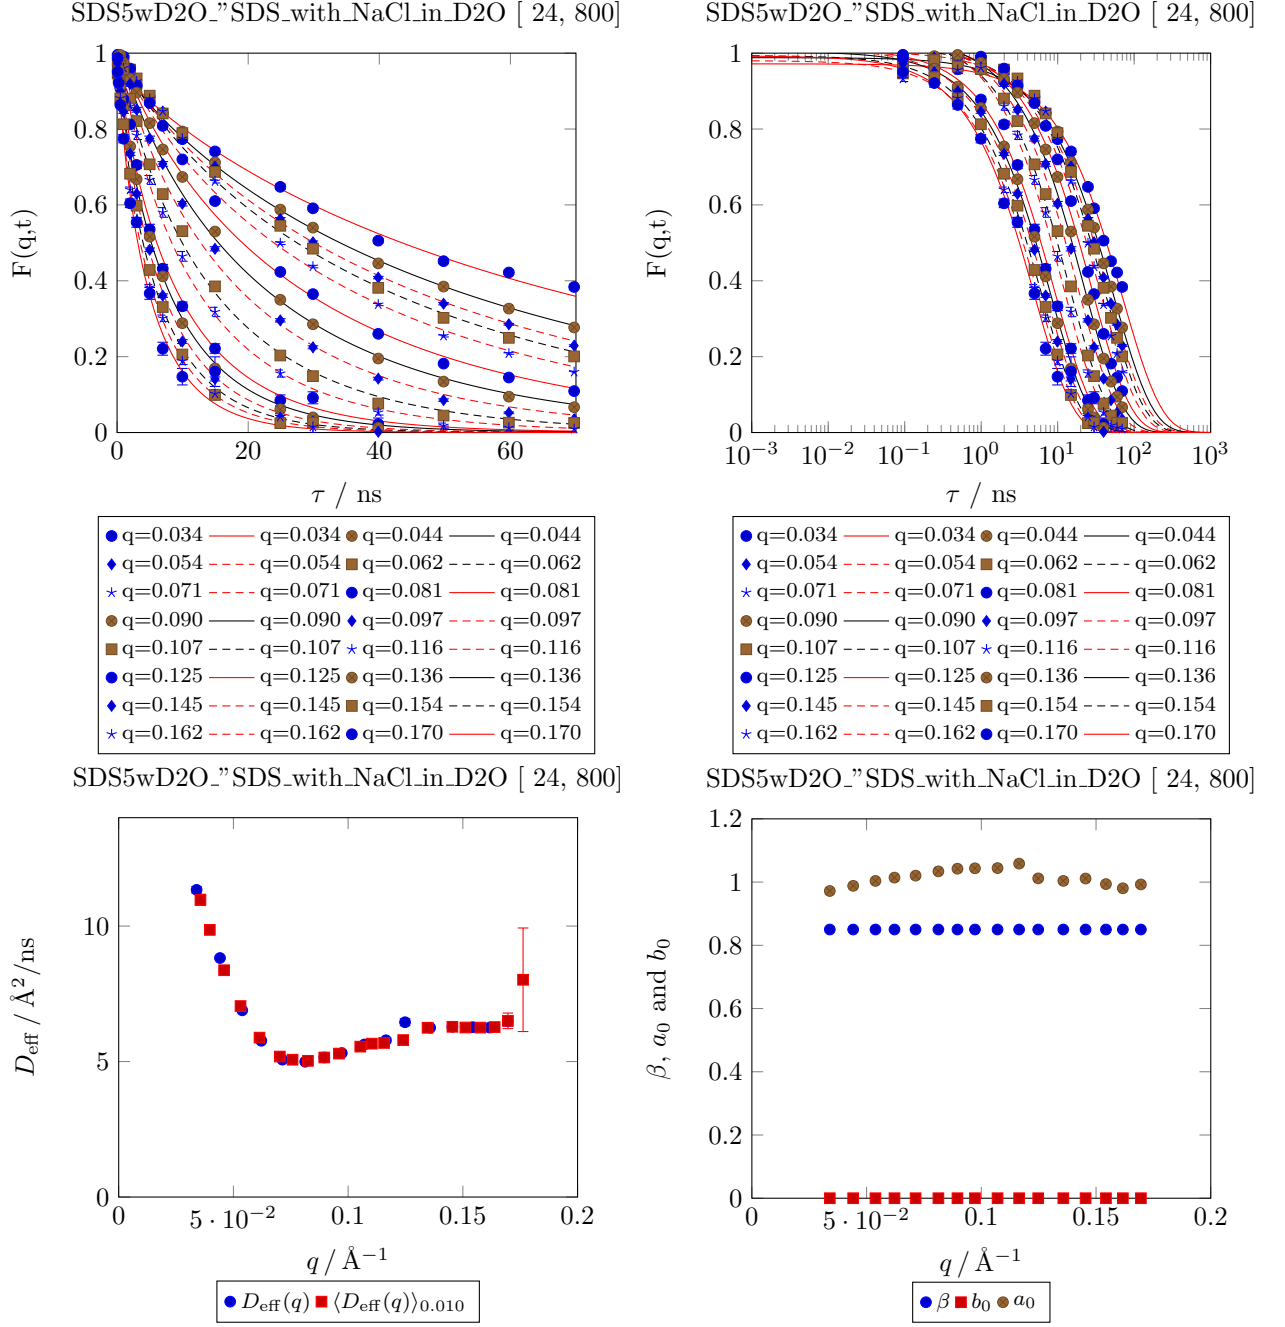

**Fitting model:**

$$F(q, t) = a_0 \left[ \exp\{-(t/\tau)^\beta\} \right] + b_0 \quad (19)$$

**Expression for the effective diffusion constant:**

$$D_{\text{eff}}(q) = \frac{1}{(\tau_0/\beta)\Gamma(1/\beta) q^2} \quad (20)$$

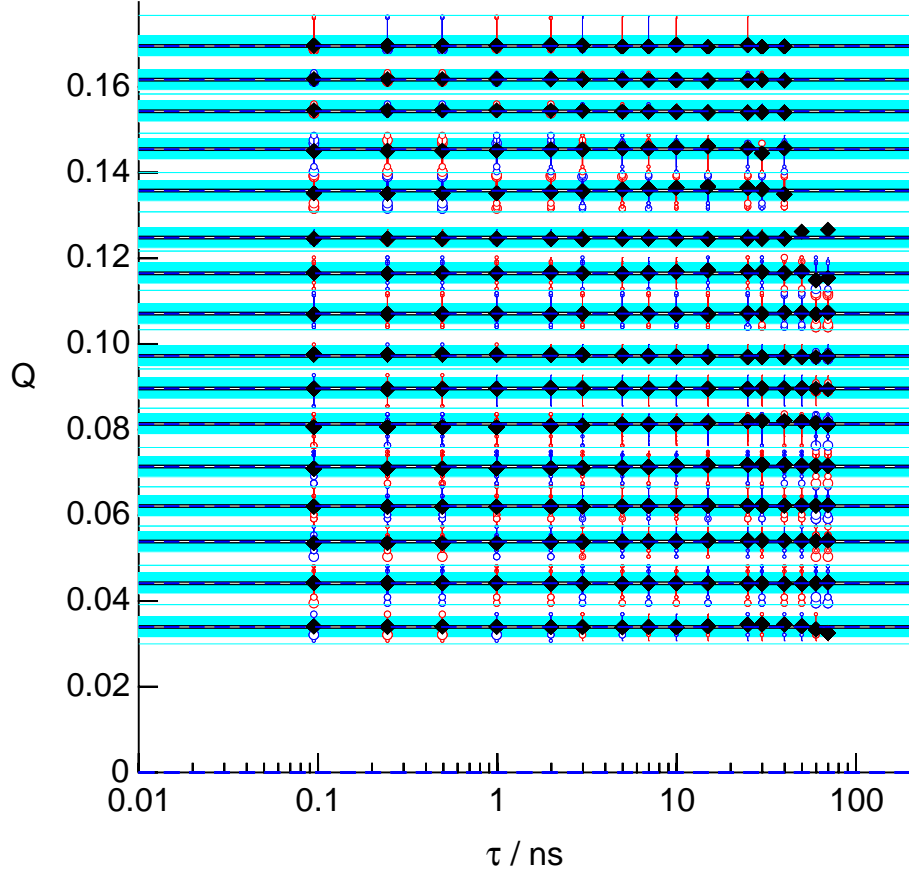

Figure 27: Mapping of single pixel contributions to  $S(q, t)$  points: black diamonds. Dashed lines indicate the average  $q$  values in the  $q$ -binning zones. Size of star rays end symbols (circles) indicate the weight of the contribution from the end symbol  $(q, t)$ . Cyan stripes indicate the catch zone for postcollection used in order to yield curves with consistent  $q$ -labels (controlled by parameter  $r.postcoll\_qcat$ ).

All underlying data of this plot group are preset as ASCII tables in file `report20670_707.tex`. The corresponding sections start with a comment line: `%%+++DRSPINE-PLOT:9: ...`.  
Data in datreat format are copied to: `report20670_707.10.dtr`.

SDS5wD2O\_”SDS\_with\_NaCl\_in\_D2O [ 26, 800]  
Without background subtraction

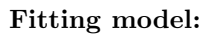

$$F(q, t) = a_0 \left[ \exp\{-(t/\tau)^\beta\} \right] + b_0 \quad (21)$$

**Expression for the effective diffusion constant:**

$$D_{\text{eff}}(q) = \frac{1}{(\tau_0/\beta)\Gamma(1/\beta)q^2} \quad (22)$$

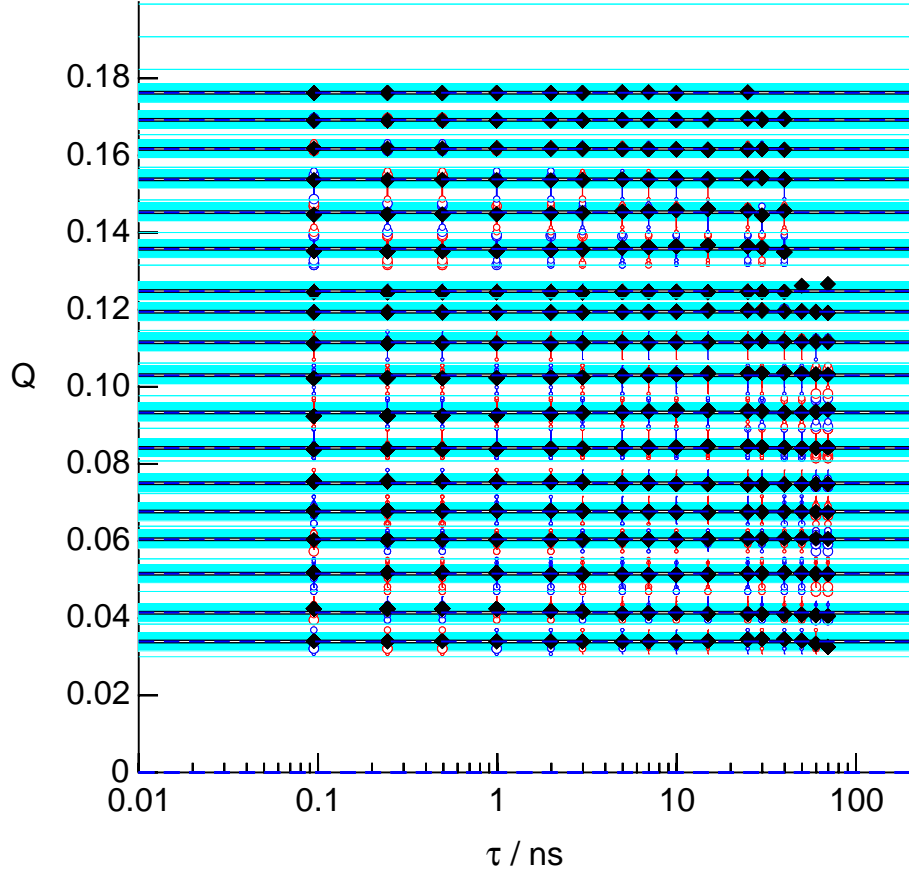

Figure 28: Mapping of single pixel contributions to  $S(q, t)$  points: black diamonds. Dashed lines indicate the average  $q$  values in the  $q$ -binning zones. Size of star rays end symbols (circles) indicate the weight of the contribution from the end symbol  $(q, t)$ . Cyan stripes indicate the catch zone for postcollection used in order to yield curves with consistent  $q$ -labels (controlled by parameter  $r.postcoll\_qcat$ ).

All underlying data of this plot group are preset as ASCII tables in file `report20670_707.tex`. The corresponding sections start with a comment line: `%%+++DRSPINE-PLOT:10: ...`. Data in datreat format are copied to: `report20670_707.11.dtr`.

**SDS5wD2O\_”SDS\_with\_NaCl\_in\_D2O [ 30, 800]**  
**Without background subtraction**

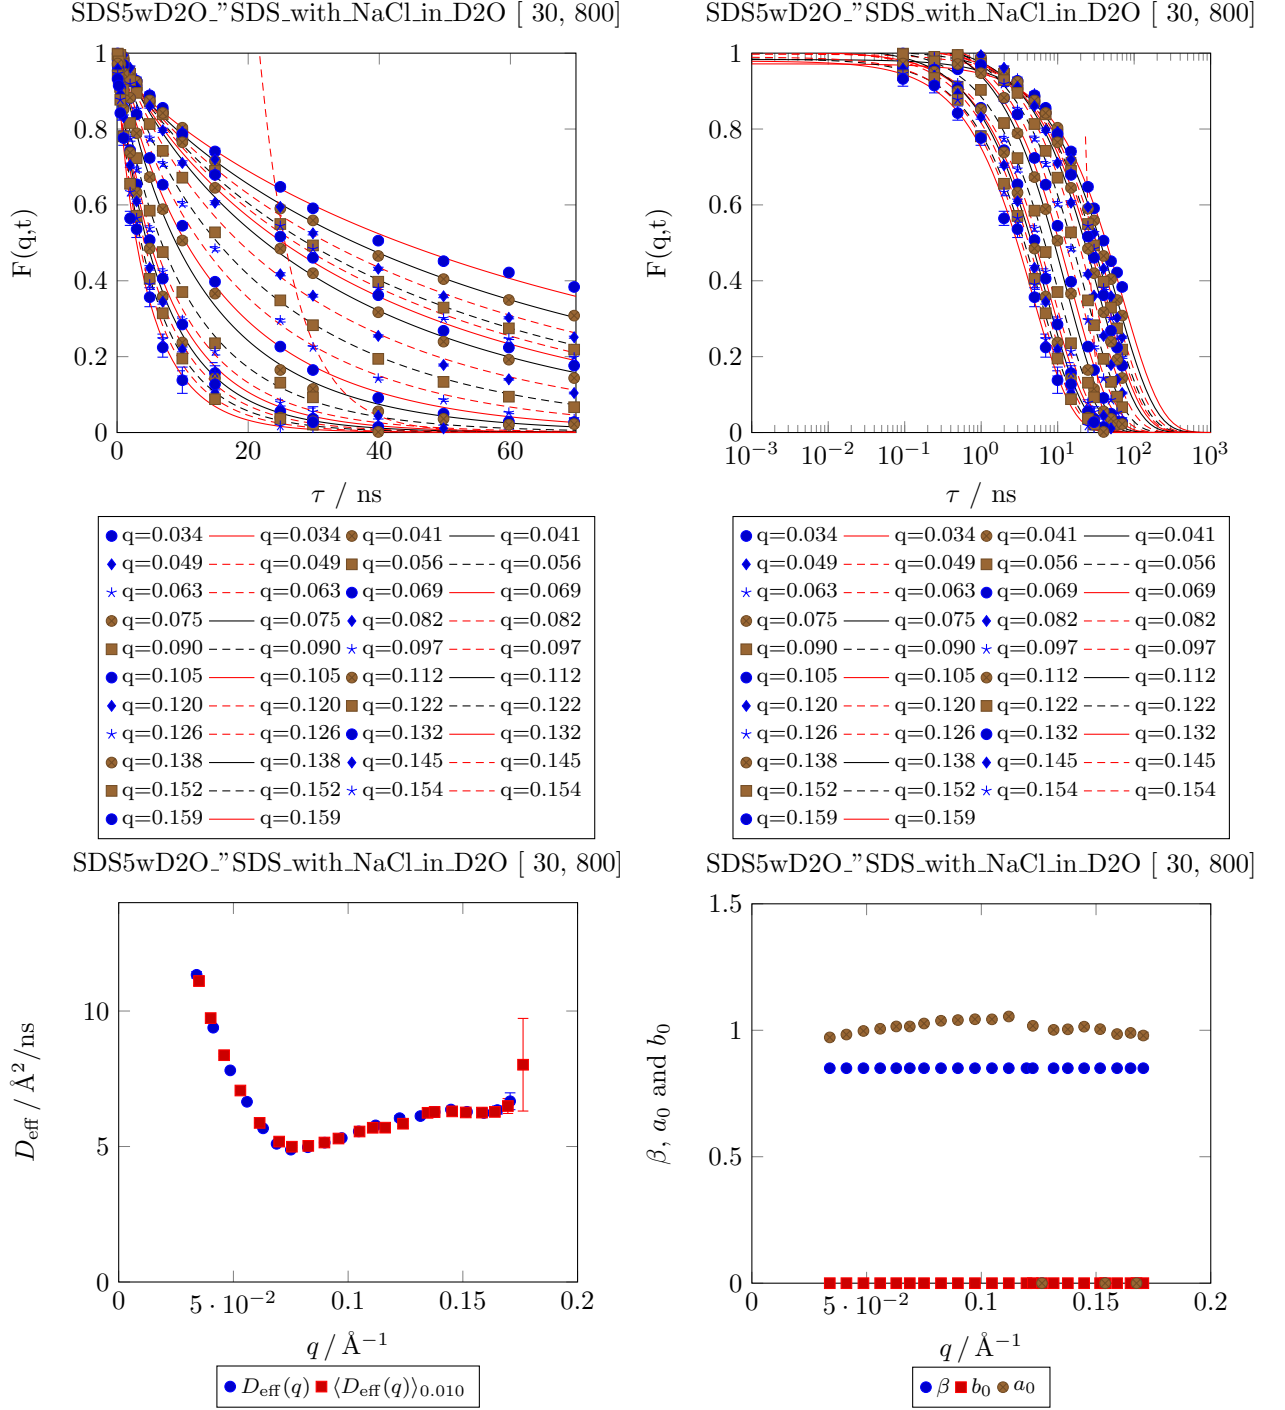

**Fitting model:**

$$F(q, t) = a_0 \left[ \exp\{-(t/\tau)^\beta\} \right] + b_0 \quad (23)$$

**Expression for the effective diffusion constant:**

$$D_{\text{eff}}(q) = \frac{1}{(\tau_0/\beta)\Gamma(1/\beta) q^2} \quad (24)$$

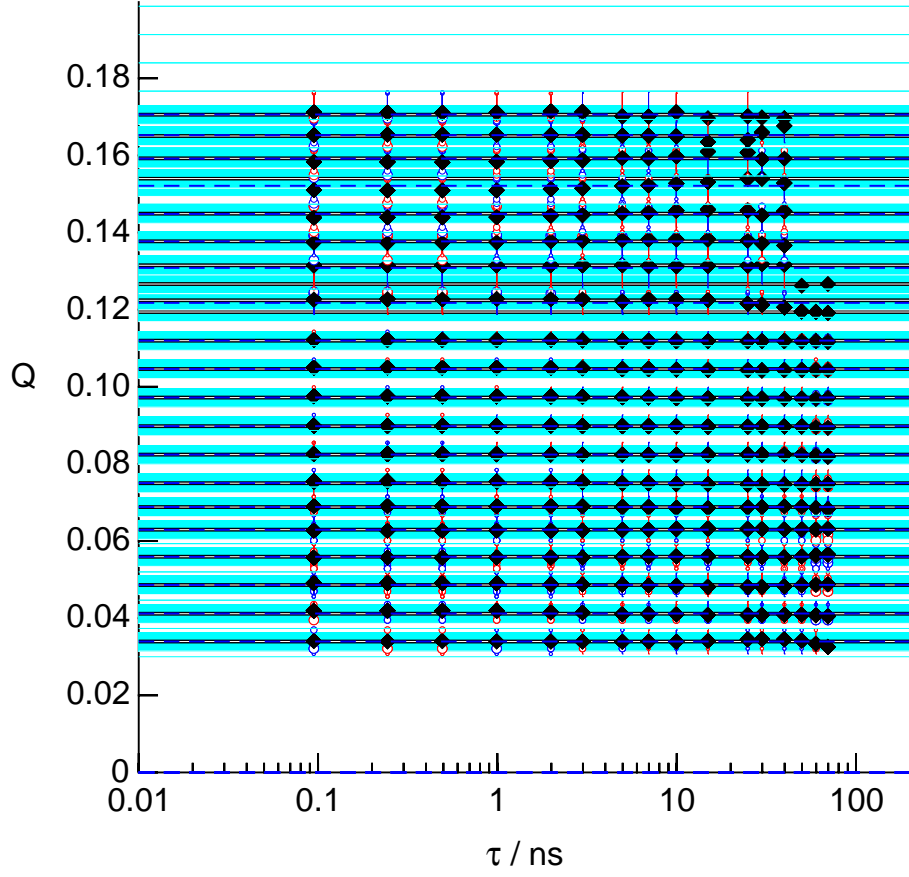

Figure 29: Mapping of single pixel contributions to  $S(q, t)$  points: black diamonds. Dashed lines indicate the average  $q$  values in the  $q$ -binning zones. Size of star rays end symbols (circles) indicate the weight of the contribution from the end symbol  $(q, t)$ . Cyan stripes indicate the catch zone for postcollection used in order to yield curves with consistent  $q$ -labels (controlled by parameter  $r.postcoll\_qcat$ ).

All underlying data of this plot group are preset as ASCII tables in file `report20670_707.tex`. The corresponding sections start with a comment line: `%%+++DRSPINE-PLOT:11: ...`.  
Data in datreat format are copied to: `report20670_707.12.dtr`.

**SDS5wD2O\_”SDS\_with\_NaCl\_in\_D2O [ 32, 800]**  
**Without background subtraction**

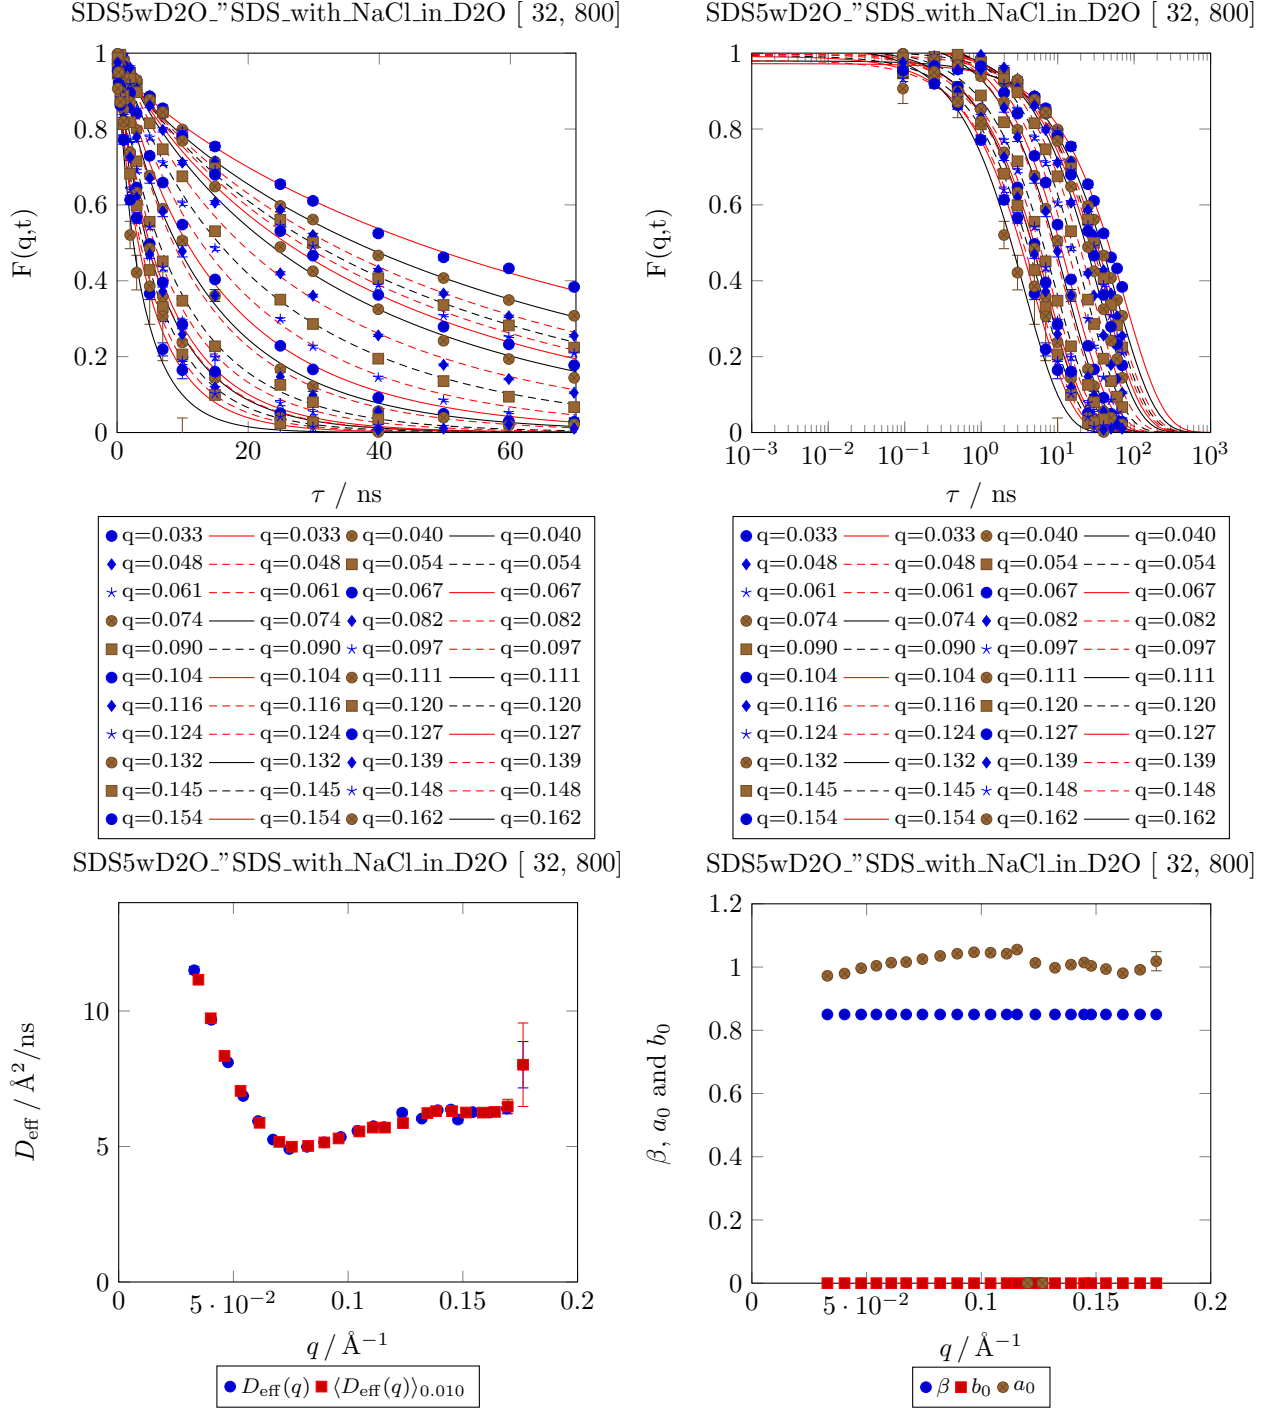

**Fitting model:**

$$F(q, t) = a_0 \left[ \exp\{-(t/\tau)^\beta\} \right] + b_0 \quad (25)$$

**Expression for the effective diffusion constant:**

$$D_{\text{eff}}(q) = \frac{1}{(\tau_0/\beta)\Gamma(1/\beta) q^2} \quad (26)$$

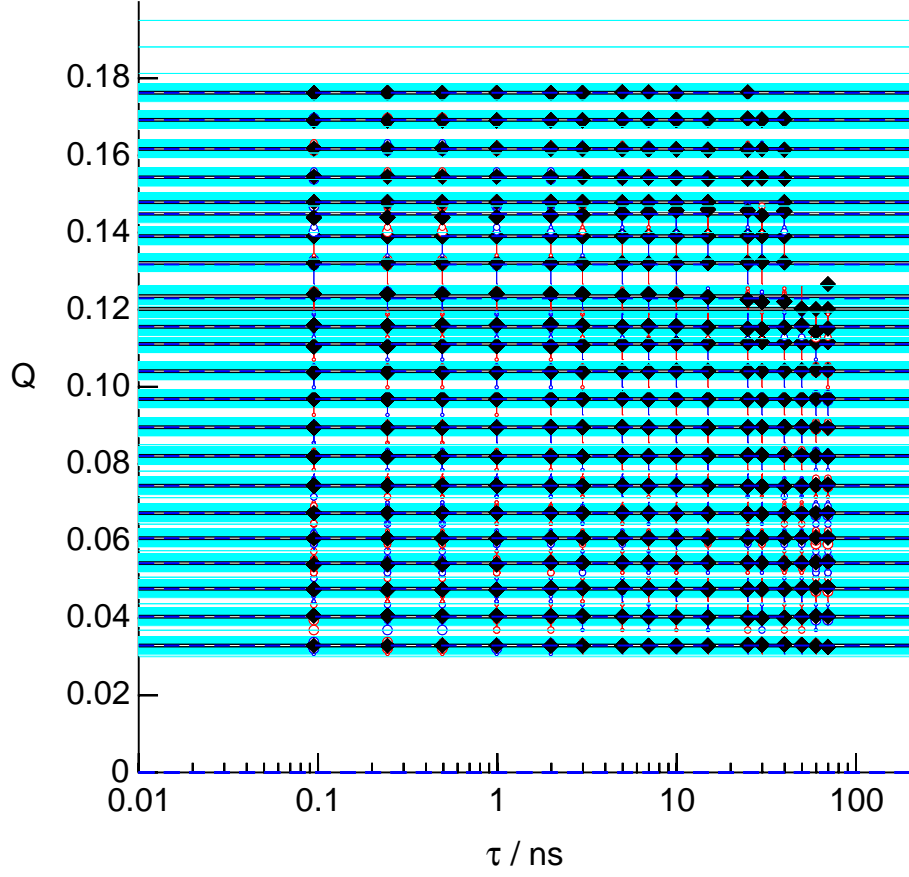

Figure 30: Mapping of single pixel contributions to  $S(q, t)$  points: black diamonds. Dashed lines indicate the average  $q$  values in the  $q$ -binning zones. Size of star rays end symbols (circles) indicate the weight of the contribution from the end symbol  $(q, t)$ . Cyan stripes indicate the catch zone for postcollection used in order to yield curves with consistent  $q$ -labels (controlled by parameter  $r.postcoll\_qcat$ ).

All underlying data of this plot group are preset as ASCII tables in file `report20670_707.tex` The corresponding sections start with a comment line: `%%+++DRSPINE-PLOT:12: ...`  
 Data in datreat format are copied to: `report20670_707.13.dtr` .

**SDS5wD2O\_”SDS\_with\_NaCl\_in\_D2O [ 34, 800]**  
**Without background subtraction**

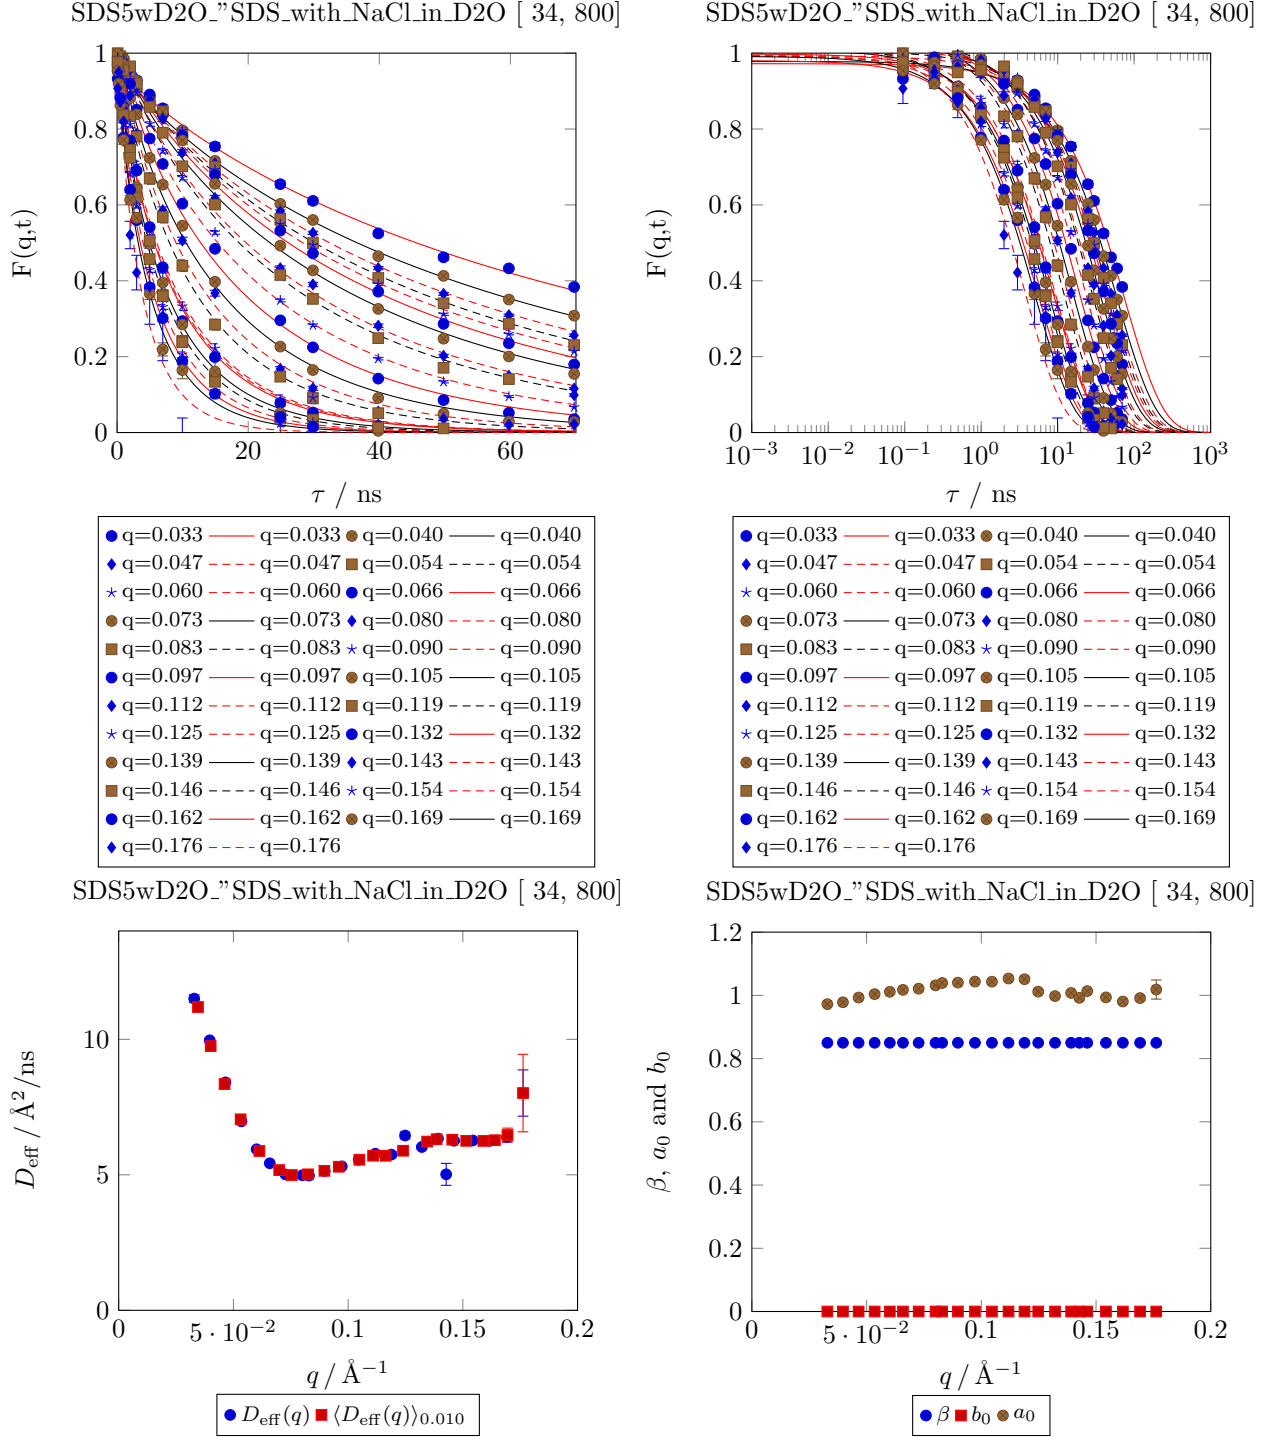

**Fitting model:**

$$F(q, t) = a_0 \left[ \exp\{-(t/\tau)^\beta\} \right] + b_0 \quad (27)$$

**Expression for the effective diffusion constant:**

$$D_{\text{eff}}(q) = \frac{1}{(\tau_0/\beta)\Gamma(1/\beta) q^2} \quad (28)$$

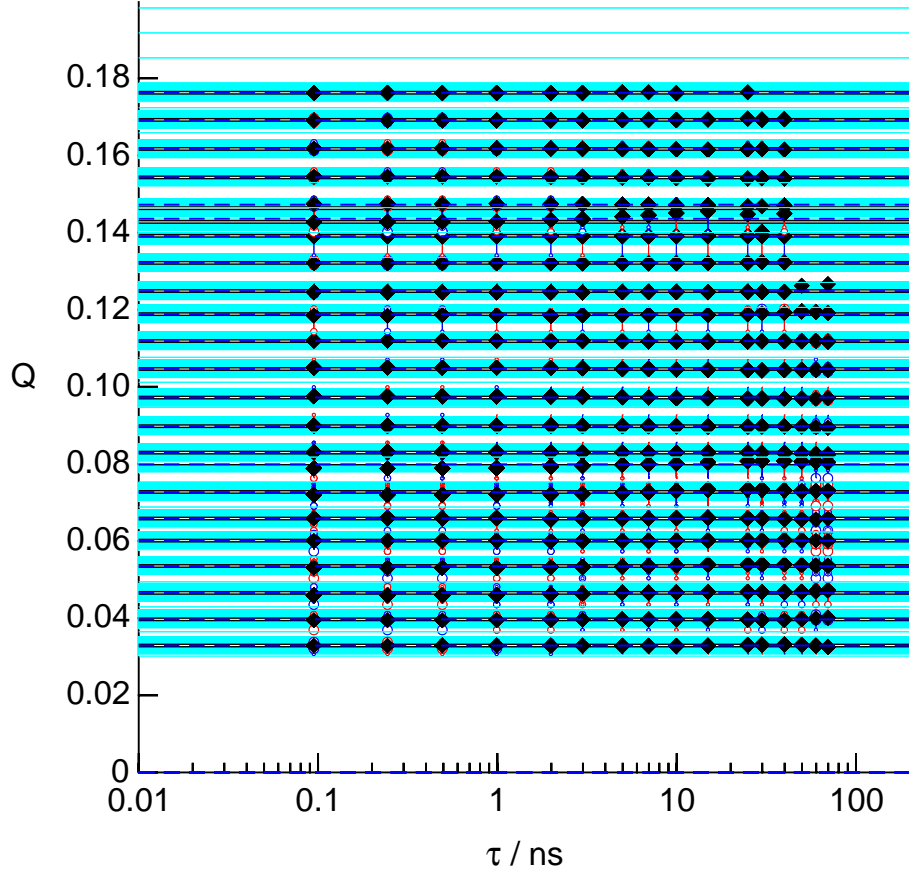

Figure 31: Mapping of single pixel contributions to  $S(q, t)$  points: black diamonds. Dashed lines indicate the average  $q$  values in the  $q$ -binning zones. Size of star rays end symbols (circles) indicate the weight of the contribution from the end symbol  $(q, t)$ . Cyan stripes indicate the catch zone for postcollection used in order to yield curves with consistent  $q$ -labels (controlled by parameter  $r.postcoll\_qcat$ ).

All underlying data of this plot group are preset as ASCII tables in file `report20670_707.tex`. The corresponding sections start with a comment line: `%%+++DRSPINE-PLOT:13: ...`.  
Data in datreat format are copied to: `report20670_707.14.dtr`.

**SDS5wD2O\_”SDS\_with\_NaCl\_in\_D2O [ 36, 800]**  
**Without background subtraction**

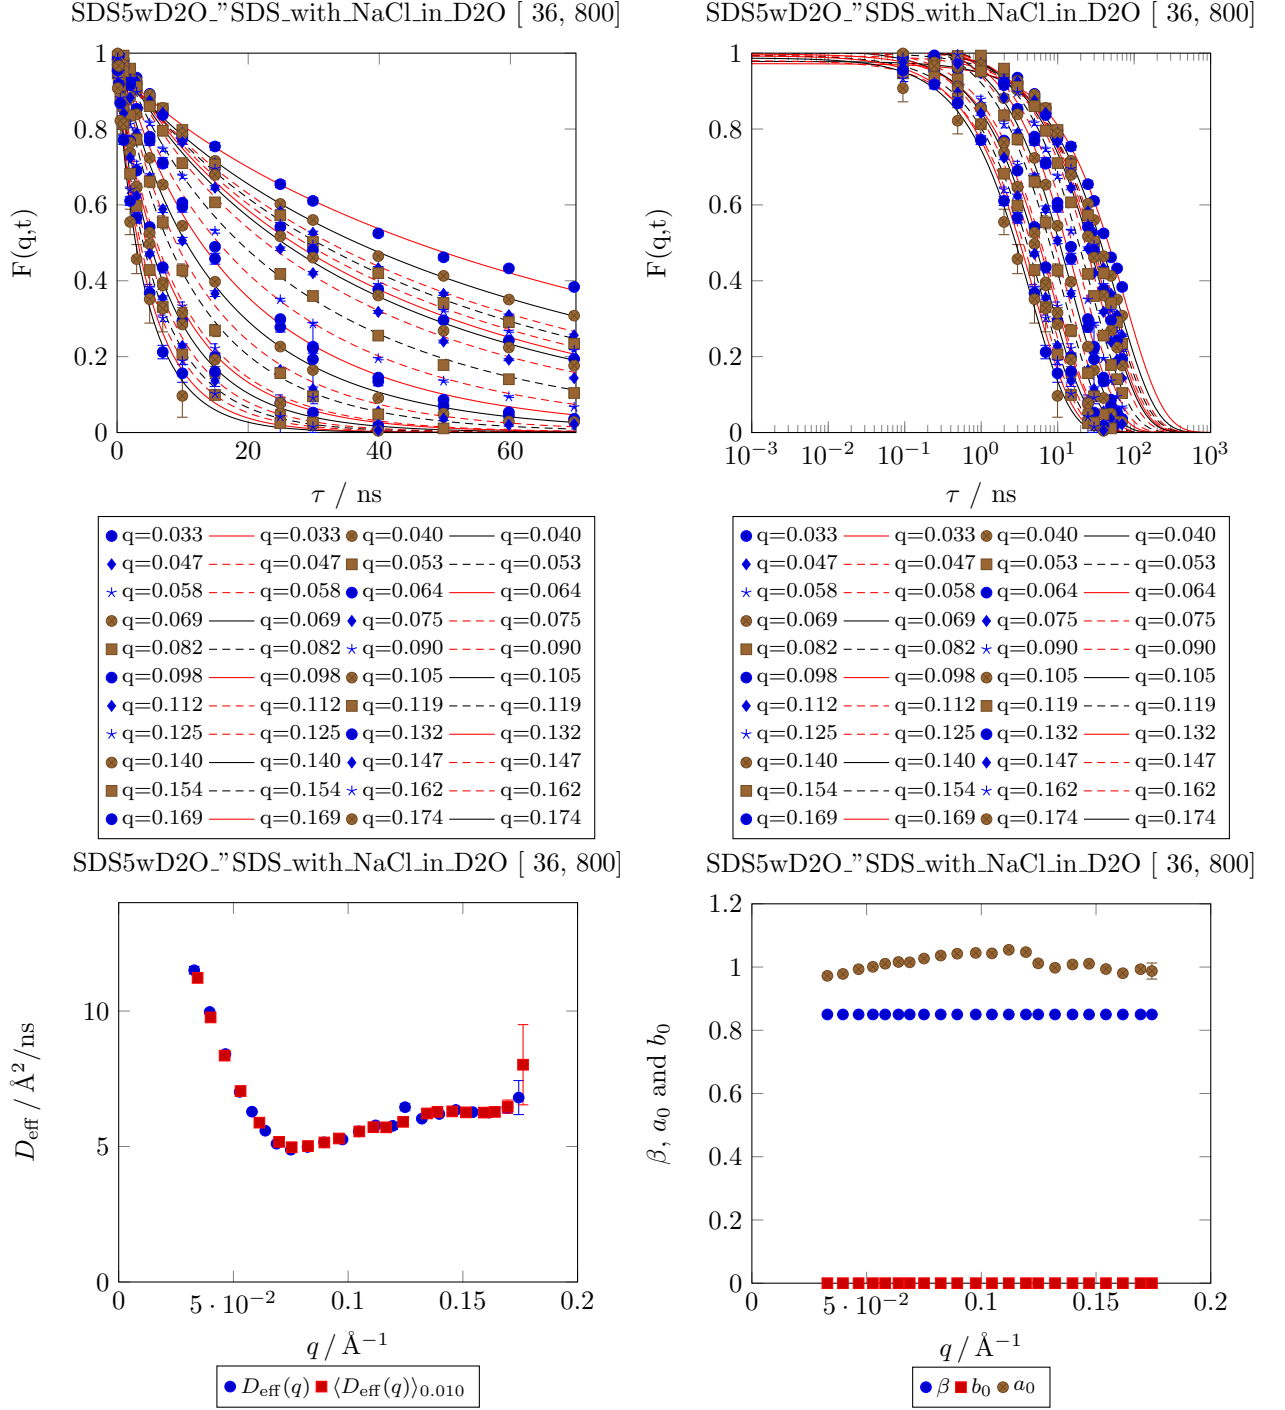

**Fitting model:**

$$F(q, t) = a_0 \left[ \exp\{-(t/\tau)^\beta\} \right] + b_0 \quad (29)$$

**Expression for the effective diffusion constant:**

$$D_{\text{eff}}(q) = \frac{1}{(\tau_0/\beta)\Gamma(1/\beta) q^2} \quad (30)$$

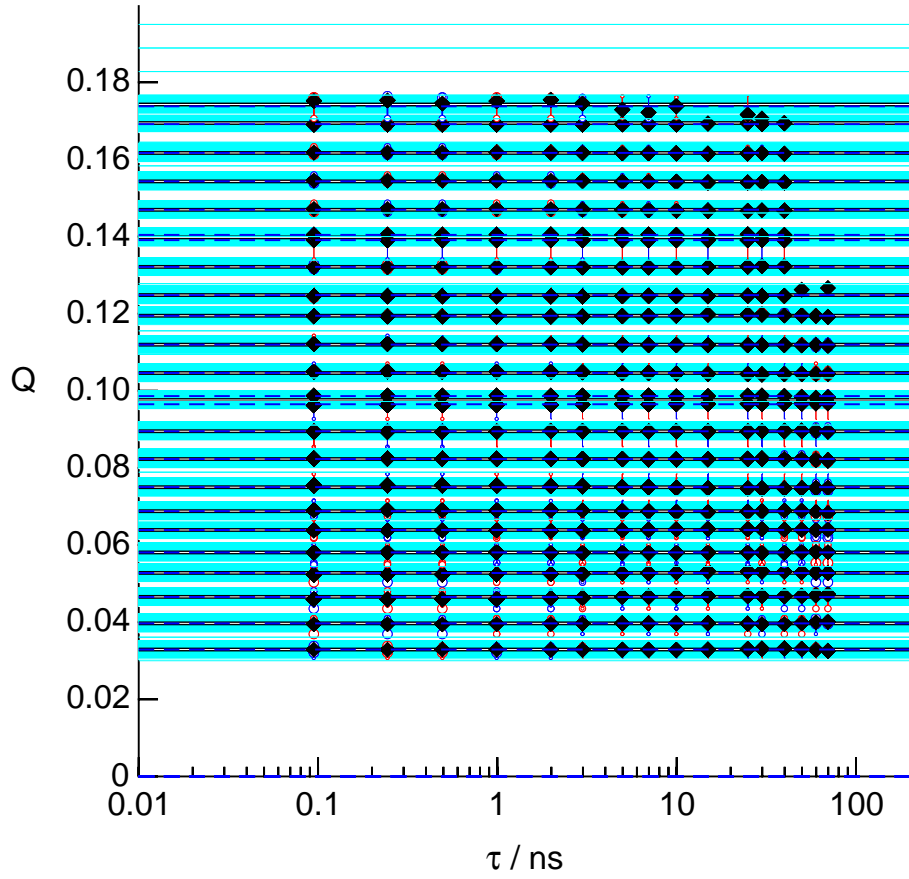

Figure 32: Mapping of single pixel contributions to  $S(q, t)$  points: black diamonds. Dashed lines indicate the average  $q$  values in the  $q$ -binning zones. Size of star rays end symbols (circles) indicate the weight of the contribution from the end symbol  $(q, t)$ . Cyan stripes indicate the catch zone for postcollection used in order to yield curves with consistent  $q$ -labels (controlled by parameter  $r.postcoll\_qcat$ ).

All underlying data of this plot group are preset as ASCII tables in file report20670\_707.tex The corresponding sections start with a comment line: %%+++DRSPINE-PLOT:14: ...  
Data in datreat format are copied to: report20670\_707.15.dtr .

---

Consolidated  $D_{eff}$  [ $\text{\AA}^2/\text{ns}$ ] of all evaluation variants (q-catch = 0.0100)

| q        | Deff      | Error(Deff) |
|----------|-----------|-------------|
| 0.034391 | 11.223007 | 0.167066    |
| 0.040064 | 9.764242  | 0.068115    |
| 0.046175 | 8.354549  | 0.049222    |
| 0.053127 | 7.047848  | 0.027779    |
| 0.061324 | 5.880940  | 0.019613    |
| 0.069916 | 5.172527  | 0.019917    |
| 0.075401 | 4.973699  | 0.036969    |
| 0.082509 | 5.016945  | 0.018727    |
| 0.089633 | 5.149308  | 0.038132    |
| 0.095990 | 5.296648  | 0.027169    |
| 0.104864 | 5.556490  | 0.045656    |
| 0.110993 | 5.713891  | 0.071990    |
| 0.116582 | 5.708161  | 0.140037    |
| 0.123972 | 5.911729  | 0.098616    |
| 0.134355 | 6.220042  | 0.052083    |
| 0.138914 | 6.280648  | 0.116270    |
| 0.145369 | 6.296748  | 0.071616    |
| 0.151339 | 6.260067  | 0.054831    |
| 0.159186 | 6.252230  | 0.108996    |
| 0.163958 | 6.277693  | 0.160739    |
| 0.169552 | 6.468785  | 0.246960    |
| 0.176244 | 8.018276  | 1.480188    |

---

## Macro: makroSDS

```
1  makro
2  clear all
3  verbose info
4  version
5  ! ==== set paths ====
6  datapath ../nse_data
7  savepath ./
8  path
9  eshape triangular
10 ! ==== set some control parameters (otherwise defaults are in effect) ====
11 set r.min_counts 100
12 set r.min_sigma 0.05
13 set r.ave_min 0.0
14 set r.ave_maxdev 0.25
15 set r.fqt_min 0.2
16 set r.fqt_maxsigma 0.8
17 set r.phase_tol 1e-9
18 set r.phase_maxdev 1.27
19 set r.phase_minoff 0.0001
20 set r.phase_cstep 1.57
21 set r.max_chisq 1000
22 set r.postcoll_qcat 0.0025e10
23 ! ==== set binning
24 bins pix nbins 8 ! possible choices 4 8 16 32
25 bins tof custom 1 2
26 ! read data:
27 ! read <rawfile> as resolution|sample|background [transmission <value>] [check all|critical --
28 !
29 read m20666.echo as resolution
30 read m20668.echo as resolution
31 read m20669.echo as resolution
32 read m20676.echo as resolution
33 read m20670.echo as sample
34 read m20672.echo as sample
35 read m20673.echo as sample
36 read m20674.echo as sample
37 read m20675.echo as sample
38 dir
39 !
40 match all ! associate reference (end background) runs with sample runs
41 fit res ! fit the resolution only
42 fit sam flag offset ! get the phase offset and fit sample
43 ! set some variables for later use
44 set bgr 0
45 set tf 1
46 set beta_ave 0.85
47 ! == post processing and output =====
48 report start
49 report dir details more normalize max_bvar 0 max_bdiff 0
50 ! show details
51 !
52 ! and all phasescans irrespective of
53 ! magnetic fluctuations in the environment
54 !
55 ! set up the collection binning scheme
56 ! for the reactor instrument NSE
57 ! the matching of chosen taus into proper corresponding bins is enforced by nbins LARGE
58 ! histo tau nbins 800 min 0.02E-9 max 400E-9 log
59 ! by default create an number of different q-binnig granularity for a posteriorfi choice
60 ! respectively comparison
61 histo q nbins 6 min 0.030E10 max 0.25E10
62 collect bgr (bgr) tfac (tf)
63 report sqtplot fix_beta (beta_ave)
64 histo q nbins 8 min 0.030E10 max 0.25E10
65 collect bgr (bgr) tfac (tf)
66 report sqtplot fix_beta (beta_ave)
67 histo q nbins 10 min 0.030E10 max 0.25E10
68 collect bgr (bgr) tfac (tf)
69 report sqtplot fix_beta (beta_ave)
70 histo q nbins 12 min 0.030E10 max 0.25E10
71 collect bgr (bgr) tfac (tf)
72 report sqtplot fix_beta (beta_ave)
73 histo q nbins 14 min 0.030E10 max 0.25E10
74 collect bgr (bgr) tfac (tf)
75 report sqtplot fix_beta (beta_ave)
76 histo q nbins 16 min 0.030E10 max 0.25E10
77 collect bgr (bgr) tfac (tf)
78 report sqtplot fix_beta (beta_ave)
79 histo q nbins 18 min 0.030E10 max 0.25E10
80 collect bgr (bgr) tfac (tf)
81 report sqtplot fix_beta (beta_ave)
82 histo q nbins 20 min 0.030E10 max 0.25E10
83 collect bgr (bgr) tfac (tf)
84 report sqtplot fix_beta (beta_ave)
85 histo q nbins 22 min 0.030E10 max 0.25E10
86 collect bgr (bgr) tfac (tf)
87 report sqtplot fix_beta (beta_ave)
88 histo q nbins 24 min 0.030E10 max 0.25E10
89 collect bgr (bgr) tfac (tf)
90 report sqtplot fix_beta (beta_ave)
91 histo q nbins 26 min 0.030E10 max 0.25E10
92 collect bgr (bgr) tfac (tf)
93 report sqtplot fix_beta (beta_ave)
94 histo q nbins 30 min 0.030E10 max 0.25E10
95 collect bgr (bgr) tfac (tf)
96 report sqtplot fix_beta (beta_ave)
97 histo q nbins 32 min 0.030E10 max 0.25E10
98 collect bgr (bgr) tfac (tf)
99 report sqtplot fix_beta (beta_ave)
100 histo q nbins 34 min 0.030E10 max 0.25E10
101 collect bgr (bgr) tfac (tf)
102 report sqtplot fix_beta (beta_ave)
103 histo q nbins 36 min 0.030E10 max 0.25E10
104 collect bgr (bgr) tfac (tf)
105 report sqtplot fix_beta (beta_ave)
106 report end ! finish tex report file and create pdf
107 clean_logs
108 quit
```
